# Supplementary material
Source: PubMed Central journal article supplement (PMC3489029)

## Supporting Information

### **Endolysins of *Bacillus anthracis* Bacteriophages Recognize Unique Carbohydrate Epitopes of Vegetative Cell Wall Polysaccharides with High Affinity and Selectivity**

Kai-For Mo,<sup>[a]</sup> Xiuru Li,<sup>[a]</sup> Huiqing Li,<sup>[a]</sup> Lih Yoon Low,<sup>[b]</sup> Conrad P. Quinn,<sup>[c]</sup> and Geert-Jan Boons<sup>[a]\*</sup>

[a] Complex Carbohydrate Research Center, University of Georgia, 315 Riverbend Road, Athens, GA 30602 (USA)

[b] Shire Human Genetic Therapies, Inc., 300 Shire Way, Lexington, MA 02421 (USA)

[c] Centers for Disease Control and Prevention<sup>§</sup>, Microbial Pathogenesis and Immune Response Laboratory, Meningitis and Vaccine Preventable Diseases Branch, NCIRD, DBD, 1600 Clifton Road, MS D-11, Atlanta, GA 30333 (USA)

**Scheme S1.** Preparation of building blocks

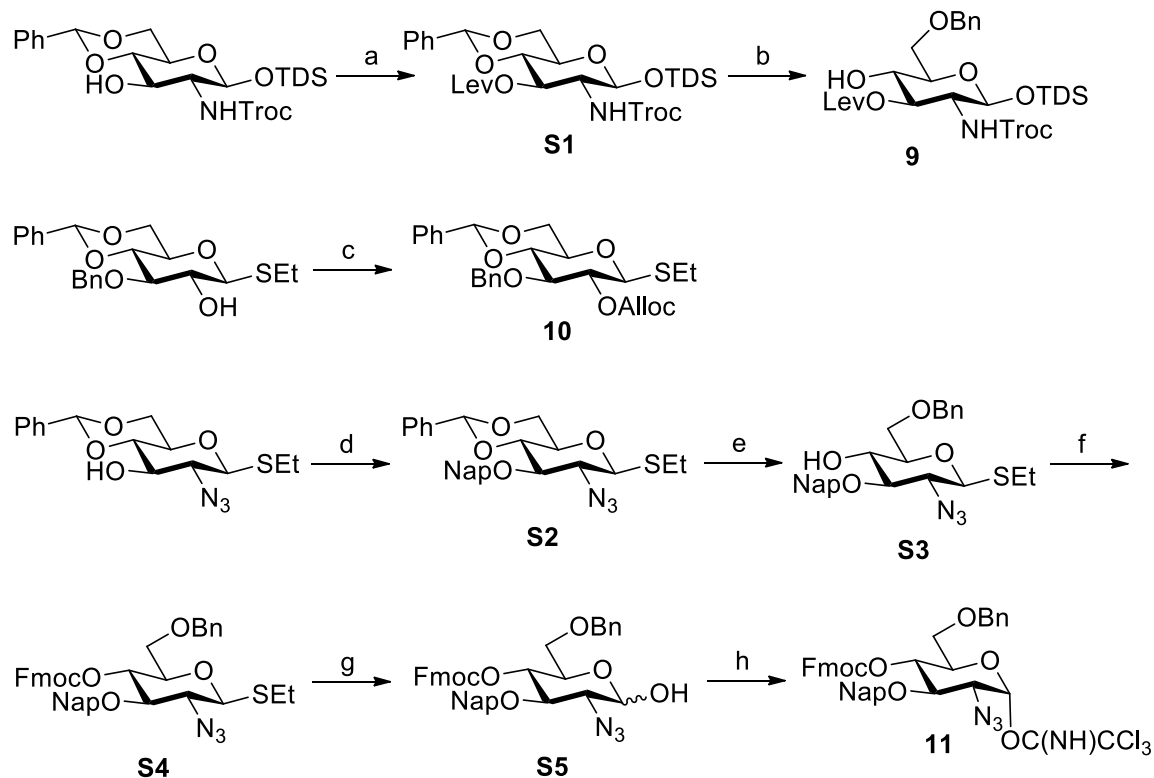

<sup>a</sup>Reagents and conditions: (a) levulinic acid, DCC, DMAP, DCM (95%); (b) Et<sub>3</sub>SiH, TfOH, DCM, -78 °C (81%); (c) allyl chloroformate, TMEDA, DMAP, DCM (86%); (d) NapBr, NaH, DMF, 0 °C (94%); (e) Et<sub>3</sub>SiH, TfOH, DCM, -78° C (85%); (f) FmocCl, Py/DCM, (82%); (g) NBS, acetone/water (88%); (h) Cl<sub>3</sub>CCN, NaH, DCM (91%).

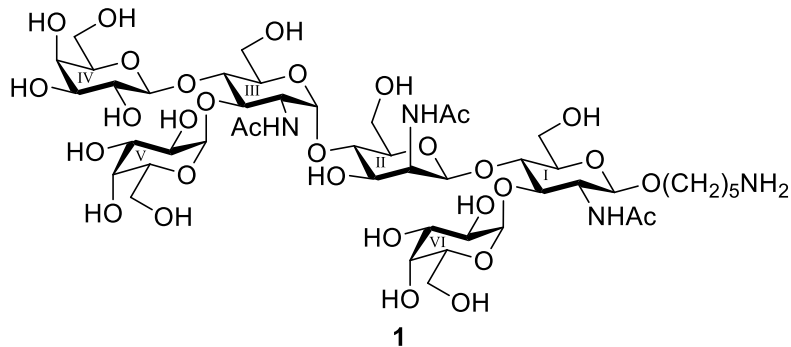

**Figure S1.** Target 1: sugar ring marked with Roman numeral I-VI were used as superscript notations in NMR analysis.

**Dimethylthexylsilyl****4,6-*O*-benzylidene-2-deoxy-3-*O*-levulinoyl-2-(2,2,2-**

**trichloroethoxy)carbonylamino- $\beta$ -D-glucopyranoside (S1).** To a stirred and cooled (0 °C) solution of dimethylthexylsilyl 4,6-*O*-benzylidene-2-deoxy-2-(2,2,2-trichloroethoxy)carbonylamino- $\beta$ -D-glucopyranoside<sup>1</sup> (5.02 g, 8.61 mmol), 4-dimethylaminopyridine (53 mg, 0.43 mmol) and *N,N'*-dicyclohexylcarbodiimide (5.32 g, 25.8 mmol) in DCM (120 mL) were added levulinic acid (2.64 mL, 25.8 mmol). The reaction mixture turned into cloudy immediately. After stirring for 2 h, the precipitated urea was filtered off and the filtrate (400 mL) was washed with saturated NaHCO<sub>3</sub> (2 × 300 mL) brine (300 mL). The organic phase was dried (MgSO<sub>4</sub>), filtered and the filtrate was concentrated under reduced pressure. The resulting yellow oil was purified by flash chromatography over silica gel (EtOAc/hexanes, 1/4, v/v) to give **S1** (5.57 g, 95%) as an amorphous white solid:  $R_f$  = 0.25 (EtOAc/hexanes, 1/4, v/v). <sup>1</sup>H NMR (500 MHz, CDCl<sub>3</sub>):  $\delta$  7.44-7.32 (m, 5H), 5.48 (s, 1H, >CHPh), 5.30 (t, 1H,  $J$  = 10 Hz, H-3), 5.18 (d,  $J$  = 9.5 Hz, 1H, NHTroc), 4.84 (d, 1H,  $J$  = 8 Hz, H-1), 4.74-4.66 (m, 2H, OCH<sub>2</sub>CCl<sub>3</sub>), 4.27 (dd, 1H,  $J$  = 5 Hz and 10.5 Hz, H-6e), 3.77 (t, 1H,  $J$  = 10.3 Hz, H-6a), 3.68 (t, 1H,  $J$  = 9.5 Hz, H-4), 3.64-3.58 (m, 1H, H-2), 3.50-3.45 (m, 1H, H-5), 2.77-2.51 (m, 4H), 2.11 (s, 3H), 1.62-1.56 (m, 1H), 0.85-0.81 (m, 12H), 0.13 (s, 3H), 0.11 (s, 3H); <sup>13</sup>C NMR (75 MHz, CDCl<sub>3</sub>):  $\delta$  206.13, 172.97, 154.45, 137.23, 129.11, 128.31, 126.28, 101.33, 96.76 (C-1), 95.64, 79.02 (C-4), 74.86, 71.97 (C-3), 68.67 (C-6), 66.25 (C-5), 58.88 (C-2), 38.07, 34.03, 29.85, 28.14, 24.86, 20.07, 18.64, -1.79, -3.25. HR MALDI-TOF MS:  $m/z$ : calcd for C<sub>29</sub>H<sub>42</sub>Cl<sub>3</sub>NO<sub>9</sub>Si [M+Na]<sup>+</sup>: 704.1592; found: 704.1616.

**Dimethylthexylsilyl****6-*O*-benzyl-2-deoxy-3-*O*-levulinoyl-2-(2,2,2-**

**trichloroethoxy)carbonylamino- $\beta$ -D-glucopyranoside (9).** According to general procedure for reductive opening of a 4,6-benzylidene, compound **9** was prepared from a mixture of the compound **S1** (1.00 g, 1.47 mmol) and 4 Å molecular sieves (380 mg) in DCM (49 mL) with

triethylsilane (0.59 mL, 3.7 mmol) and triflic acid (0.29 mL, 3.3 mmol). The reaction was kept at -78 °C over a period of 1 h. The resulting yellow oil was purified by flash chromatography over silica gel (EtOAc/hexanes, 2/3, v/v) to give **9** (0.81 g, 81%) as an amorphous white solid:  $R_f = 0.21$  (EtOAc/hexanes, 2/3, v/v).  $^1\text{H NMR}$  (500 MHz,  $\text{CDCl}_3$ ):  $\delta$  7.34-7.25 (m, 5H), 5.04-5.00 (m, 2H, H-3 and *NHTroc*), 4.74-4.55 (m, 4H,  $\text{OCH}_2\text{Ph}$  and  $\text{OCH}_2\text{CCl}_3$ ), 4.71 (d, 1H,  $J = 8$  Hz, H-1), 3.78-3.70 (m, 3H, H-4, H-6a and H-6e), 3.61-3.55 (m, 1H, H-2), 3.53-3.50 (m, 1H, H-5), 3.19 (s, 1H, *OH*), 2.78-2.49 (m, 4H), 2.15 (s, 3H), 1.62-1.56 (m, 1H), 0.84-0.78 (m, 12H), 0.16 (s, 3H), 0.11 (s, 3H);  $^{13}\text{C NMR}$  (75 MHz,  $\text{CDCl}_3$ ):  $\delta$  207.57, 173.58, 154.43, 138.20, 128.56, 127.83, 127.73, 96.36 (C-1), 95.67, 75.93 (C-3), 74.81, 74.67 (C-5), 73.77, 70.51 (C-4), 70.16 (C-6), 57.95 (C-2), 38.42, 34.13, 29.92, 28.41, 24.96, 20.16, 18.69, -1.71, -3.26. HR MALDI-TOF MS:  $m/z$ : calcd for  $\text{C}_{29}\text{H}_{44}\text{Cl}_3\text{NO}_9\text{Si}$   $[\text{M}+\text{Na}]^+$ : 706.1749; found: 706.1777.

**Ethyl 2-*O*-allyloxycarbonyl-3-*O*-benzyl-4,6-*O*-benzylidene-1-thio- $\beta$ -D-glucopyranoside (**10**).**

To a stirred and cooled (0 °C) solution of ethyl 3-*O*-benzyl-4,6-*O*-benzylidene-1-thio- $\beta$ -D-glucopyranoside<sup>2</sup> (3.15 g, 7.84 mmol), *N,N,N',N'*-tetramethylethylenediamine (1.76 mL, 11.8 mmol) and 4-dimethylaminopyridine (286 mg, 2.34 mmol) in DCM (45 mL) were added allyl chloroformate (2.09 mL, 19.6 mmol). After stirring at room temperature for 16 h, the reaction mixture was diluted with DCM (300 mL) and was washed with saturated  $\text{NaHCO}_3$  (2  $\times$  250 mL) brine (250 mL). The organic phase was dried ( $\text{MgSO}_4$ ), filtered and the filtrate was concentrated under reduced pressure. The resulting yellow oil was purified by flash chromatography over silica gel (EtOAc/hexanes, 1/8, v/v) to give **10** (3.16 g, 86%) as an amorphous white solid:  $R_f = 0.35$  (EtOAc/hexanes, 1/6, v/v).  $^1\text{H NMR}$  (500 MHz,  $\text{CDCl}_3$ ):  $\delta$  7.48-7.25 (m, 10H), 5.96-5.88 (m, 1H,  $\text{OCH}_2\text{CH}=\text{CH}_2$ ), 5.56 (s, 1H,  $>\text{CHPh}$ ), 5.38-5.25 (m, 2H,  $\text{OCH}_2\text{CH}=\text{CH}_2$ ), 4.88 (d, 1H,  $J = 11.5$  Hz,  $\text{OCHHPh}$ ), 4.83 (dd, 1H,  $J = 8.5$  Hz and 10 Hz, H-2), 4.70 (d, 1H,  $J = 12$  Hz,

OCHHPH), 4.65 (d,  $J = 6$  Hz, 2H,  $\text{OCH}_2\text{CH}=\text{CH}_2$ ), 4.51 (d, 1H,  $J = 8$  Hz, H-1), 4.36 (dd, 1H,  $J = 5$  Hz and 10.5 Hz, H-6e), 3.81-3.72 (m, 3H, H-3, H-4 and H-6a), 3.50-3.45 (m, 1H, H-5), 2.74-2.69 (m, 2H), 1.25 (t, 1H,  $J = 7.3$  Hz);  $^{13}\text{C}$  NMR (75 MHz,  $\text{CDCl}_3$ ):  $\delta$  154.30, 138.19, 137.25, 131.49, 129.19, 128.41, 127.90, 127.81, 126.15, 119.13, 101.36, 84.24 (C-1), 81.44 (C-4), 80.05 (C-3), 75.77 (C-2), 74.76, 70.74 (C-5), 69.02, 68.67 (C-6), 24.37, 14.97. HR MALDI-TOF MS:  $m/z$ : calcd for  $\text{C}_{26}\text{H}_{30}\text{O}_7\text{S}$   $[\text{M}+\text{Na}]^+$ : 509.1610; found: 509.1645.

**Ethyl 2-azido-4,6-*O*-benzylidene-2-deoxy-3-*O*-(2-methylnaphthyl)-1-thio- $\beta$ -D-glucopyranoside (S2).** To a stirred and cooled (0 °C) solution of ethyl 2-azido-4,6-*O*-benzylidene-2-deoxy-1-thio- $\beta$ -D-glucopyranoside<sup>3</sup> (3.78 g, 11.2 mmol) and 2-(bromomethyl)naphthalene (3.72 g, 16.8 mmol) in DMF (50 mL) under an atmosphere of Ar were added sodium hydride (896 mg, 22.4 mmol, 60% in oil) in small portion. After stirring for 1 h at room temperature, the reaction was quenched by the addition of MeOH (50 mL). The organic solution was diluted with DCM (300 mL) and was washed with water (2  $\times$  250 mL) and brine (250 mL). The organic phase was dried ( $\text{MgSO}_4$ ), filtered and the filtrate was concentrated under reduced pressure. The resulting yellow oil was purified by flash chromatography over silica gel (EtOAc/hexanes, 1/12, v/v) to give **S2** (5.03 g, 94%) as an amorphous white solid:  $R_f = 0.26$  (EtOAc/hexanes, 1/10, v/v).  $^1\text{H}$  NMR (500 MHz,  $\text{CDCl}_3$ ):  $\delta$  7.82-7.38 (m, 12H), 5.60 (s, 1H,  $>\text{CHPh}$ ), 5.10-4.97 (m, 2H,  $\text{OCH}_2\text{Nap}$ ), 4.37-4.32 (m, 2H, H-1 and H-6e), 3.79-3.73 (m, 2H, H-4 and H-6a), 3.68 (t, 1H,  $J = 9$  Hz, H-3) 3.49 (dd, 1H,  $J = 9$  Hz and 10 Hz, H-2), 3.45-3.41 (m, 1H, H-5) 2.79-2.71 (m, 2H), 1.31 (t, 1H,  $J = 7.5$  Hz);  $^{13}\text{C}$  NMR (75 MHz,  $\text{CDCl}_3$ ):  $\delta$  137.28, 135.32, 133.39, 133.25, 129.28, 128.48, 128.34, 128.14, 127.85, 127.27, 126.30, 126.22, 126.20, 126.12, 101.51, 85.10 (C-1), 81.63 (C-4), 80.88 (C-3), 75.16 (C-2), 70.55 (C-5), 68.65 (C-6),

65.99 (C-2), 25.08, 15.18. HR MALDI-TOF MS:  $m/z$ : calcd for  $C_{26}H_{27}N_3O_4S$   $[M+Na]^+$ : 500.1620; found: 500.1649.

**Ethyl 2-azido-6-*O*-benzyl-2-deoxy-3-*O*-(2-methylnaphthyl)-1-thio- $\beta$ -D-glucopyranoside (S3).**

According to general procedure for reductive opening of a 4,6-benzylidene, compound **S3** was prepared from a mixture of compound **S2** (1.00 g, 2.10 mmol), and 4 Å molecular sieves (1.5 g) in DCM (70 mL) with triethylsilane (0.84 mL, 5.2 mmol) and triflic acid (0.41 mL, 4.6 mmol). The reaction was kept at -78 °C over a period of 1 h. The resulting yellow oil was purified by flash chromatography over silica gel (EtOAc/hexanes, 1/4, v/v) to give **S3** (850 mg, 85%) as an amorphous white solid:  $R_f$  = 0.31 (EtOAc/hexanes, 1/3, v/v).  $^1H$  NMR (500 MHz,  $CDCl_3$ ):  $\delta$  7.85-7.28 (m, 12H), 5.08-5.00 (m, 2H,  $OCH_2$ Nap), 4.58-4.52 (m, 2H,  $OCH_2$ Ph), 4.30 (d, 1H,  $J$  = 10 Hz, H-1), 3.75-3.68 (m, 3H, H-4, H-6a and H-6e), 3.44-3.39 (m, 3H, H-2, H-3 and H-5), 2.77 (s, 1H, OH), 2.76-2.68 (m, 2H), 1.30 (t, 3H,  $J$  = 7.5 Hz);  $^{13}C$  NMR (75 MHz,  $CDCl_3$ ):  $\delta$  137.70, 135.53, 133.42, 133.21, 128.60, 128.51, 128.12, 128.01, 127.87, 127.11, 126.30, 126.16, 126.09, 84.54 (C-3), 84.40 (C-1), 77.96 (C-5), 75.44, 73.83, 72.51 (C-4), 70.52 (C-6), 65.60 (C-2), 24.78, 15.19. HR MALDI-TOF MS:  $m/z$ : calcd for  $C_{26}H_{29}N_3O_4S$   $[M+Na]^+$ : 502.1776; found: 502.1825.

**Ethyl 2-azido-6-*O*-benzyl-2-deoxy-4-*O*-(9-fluorenylmethyloxycarbonyl)-3-*O*-(2-methylnaphthyl)-1-thio- $\beta$ -D-glucopyranoside (S4).** To a stirred solution of **S3** (1.52 g, 3.17 mmol) in DCM (30 mL) and pyridine (15 mL) under an atmosphere of Ar were added fluorenylmethyloxycarbonyl chloride (2.46 g in 10 mL DCM, 9.51 mmol) slowly. After stirring for 16 h, the reaction mixture was diluted with DCM (300 mL) and was washed with water (250 mL), 1M HCl (2  $\times$  250 mL) and brine (250 mL). The organic phase was dried ( $MgSO_4$ ), filtered and the filtrate was concentrated under reduced pressure. The resulting yellow oil was purified by flash chromatography over silica gel (EtOAc/hexanes, 10/1 $\rightarrow$ 8/1, v/v) to give **S4** (1.82 g,

82%) as an amorphous white solid:  $R_f = 0.22$  (EtOAc/hexanes, 1/6, v/v).  $^1\text{H}$  NMR (500 MHz,  $\text{CDCl}_3$ ):  $\delta$  7.75-7.19 (m, 20H), 4.96 (d, 1H,  $J = 11.5$  Hz, OCHHNap), 4.89 (t, 1H,  $J = 9.3$  Hz, H-4), 4.83 (d, 1H,  $J = 11.5$  Hz, OCHHNap), 4.48 (s, 2H,  $\text{CH}_2\text{CHFmoc}$ ), 4.31 (d, 1H,  $J = 10.5$  Hz, H-1), 4.25-4.15 (m, 2H,  $\text{OCH}_2\text{Ph}$ ), 3.99 (t, 1H,  $J = 7.3$  Hz,  $\text{CH}_2\text{CHFmoc}$ ), 3.63-3.57 (m, 4H, H-3, H-5 and H-6a and H-6e), 3.49 (t, 1H,  $J = 9.8$  Hz, H-2), 2.81-2.69 (m, 2H), 1.31 (t, 3H,  $J = 7.5$  Hz);  $^{13}\text{C}$  NMR (75 MHz,  $\text{CDCl}_3$ ):  $\delta$  154.37, 143.28, 143.23, 141.40, 141.38, 137.96, 134.99, 133.31, 133.15, 128.44, 128.28, 128.08, 128.03, 127.78, 127.77, 127.70, 127.27, 126.90, 126.21, 126.10, 125.91, 125.18, 125.09, 120.20, 84.46 (C-1), 82.49 (C-3), 77.31(C-5), 75.52 (C-4), 75.50, 73.67, 70.12, 69.64 (C-6), 65.84 (C-2), 46.72, 24.89, 15.23. HR MALDI-TOF MS: m/z: calcd for  $\text{C}_{41}\text{H}_{39}\text{N}_3\text{O}_6\text{S}$   $[\text{M}+\text{Na}]^+$ : 724.2457; found: 724.2479.

***O*-[2-Azido-6-*O*-benzyl-2-deoxy-4-*O*-(9-fluorenylmethyloxycarbonyl)-3-*O*-(2-**

**methylnaphthyl)]- $\alpha$ -D-glucopyranosyl Trichloroacetimidate (11).** To a stirred solution of **S4** (1.02 g, 1.46 mmol) in a mixture of acetone and water (4/1, v/v, 15 mL) was added *N*-bromosuccinimide (1.30 g, 7.30 mmol). After stirring for 40 min, the reaction mixture was diluted with DCM (150 mL) and washed with saturated  $\text{NaHCO}_3$  ( $2 \times 150$  mL), brine (150 mL). The organic layer was dried ( $\text{MgSO}_4$ ), filtered and the filtrate was concentrated under reduced pressure. The resulting yellow oil was purified by flash chromatography over silica gel (EtOAc/hexanes, 1/3, v/v) to give **S5** as an inseparable mixture of  $\alpha$ - and  $\beta$ -anomer (803 mg, 88%) as an amorphous white solid:  $R_f = 0.20$  (EtOAc/hexanes, 1/4, v/v). HR MALDI-TOF MS: m/z: calcd for  $\text{C}_{39}\text{H}_{35}\text{N}_3\text{O}_7$   $[\text{M}+\text{Na}]^+$ : 680.2373; found: 680.2411. To a stirred solution of  $\alpha$ - and  $\beta$ -hemiacetals **S5** (310 mg, 0.472 mmol) in DCM (5.5 mL) was added trichloroacetonitrile (0.472 mL, 4.72 mmol) followed by sodium hydride (10 mg, 0.236 mmol, 60% in oil) under an atmosphere of Ar. After stirring at room temperature for 30 min, the reaction mixture was

filtered, and the filtrate was concentrated under reduced pressure. The resulting yellow oil was purified by flash chromatography over silica gel (EtOAc/hexanes, 1/4, v/v) to give **11** (344 mg, 91%) as an amorphous white solid:  $R_f = 0.36$  (EtOAc/hexanes, 1/4, v/v).  $^1\text{H}$  NMR (300 MHz,  $\text{CDCl}_3$ ):  $\delta$  8.74 (s, 1H), 7.76-7.19 (m, 20H), 6.45 (d, 1H,  $J = 3.6$  Hz, H-1), 5.17 (t, 1H,  $J = 9.9$  Hz, H-4), 5.00-4.85 (m, 2H,  $\text{OCH}_2\text{Nap}$ ), 4.48 (d, 2H,  $J = 2.7$  Hz,  $\text{OCH}_2\text{Ph}$ ), 4.31-4.11 (m, 4H, H-3, H-5 and  $\text{CH}_2\text{CHFmoc}$ ), 4.01 (t, 1H,  $J = 6.9$  Hz,  $\text{CH}_2\text{CHFmoc}$ ), 3.78 (dd, 1H,  $J = 3.6$  Hz and 10.2 Hz, H-2), 3.64-3.55 (m, 2H, H-6a and H-6e);  $^{13}\text{C}$  NMR (75 MHz,  $\text{CDCl}_3$ ):  $\delta$  160.76, 154.31, 143.30, 143.28, 141.46, 141.45, 137.82, 134.87, 133.37, 133.22, 128.49, 128.36, 128.15, 128.11, 127.93, 127.88, 127.85, 127.83, 127.36, 127.05, 126.29, 126.18, 125.99, 125.22, 125.13, 120.26, 120.25, 94.60 (C-1), 90.98, 77.93 (C-3), 75.40, 74.95 (C-4), 73.79, 71.77 (C-5), 70.33, 68.45 (C-6), 62.80 (C-2), 46.79.

**Dimethylthexylsilyl** ***O*-(2-*O*-allyloxycarbonyl-3-*O*-benzyl-4,6-*O*-benzylidene- $\beta$ -D-glucopyranosyl)-(1 $\rightarrow$ 4)-6-*O*-benzyl-2-deoxy-3-*O*-levulinoyl-2-(2,2,2-**

**trichloroethoxy)carbonylamino- $\beta$ -D-glucopyranoside (15).** A mixture of the glucosyl acceptor **9** (450 mg, 0.657 mmol) and glucosyl donor **10** (415 mg, 0.853 mmol), 4 Å molecular sieves (1.3 g) in DCM (15 mL) was stirred under an atmosphere of Ar for 1 h. The reaction was cooled (-20 °C) and NIS (230 mg, 1.02 mmol) was added followed by the addition of TMSOTf (30  $\mu\text{L}$ , 0.17 mmol). After stirring for 1 h, the reaction was quenched by the addition of  $\text{Et}_3\text{N}$  (0.5 mL). The mixture was filtered, and the filtrate (180 mL) was washed with 10%  $\text{Na}_2\text{S}_2\text{O}_3$  (160 mL) and brine (160 mL). The organic phase was dried ( $\text{MgSO}_4$ ), filtered and the filtrate was concentrated under reduced pressure. The resulting yellow oil was purified by flash chromatography over silica gel (EtOAc/hexanes, 1/3, v/v) to give **15** (614 mg, 86%) as an amorphous white solid:  $R_f = 0.33$  (EtOAc/hexanes, 1/3, v/v).  $^1\text{H}$  NMR (500 MHz,  $\text{CDCl}_3$ ):  $\delta$  7.46-7.25 (m, 15H), 5.91-5.83



(m, 1H, OCH<sub>2</sub>CH=CH<sub>2</sub>), 5.53 (s, 1H, >CHPh), 5.34-5.22 (m, 2H, OCH<sub>2</sub>CH=CH<sub>2</sub>), 5.08 (t, 1H, *J* = 10 Hz, H-3<sup>I</sup>), 4.98 (d, 1H, *J* = 9 Hz, H-1, NHTroc), 4.87-4.50 (m, 11H, H-1<sup>I</sup>, H-1<sup>II</sup>, H-2<sup>II</sup>, OCH<sub>2</sub>CH=CH<sub>2</sub>, OCH<sub>2</sub>CCl<sub>3</sub> and two OCH<sub>2</sub>Ph), 4.30 (dd, 1H, *J* = 5 Hz and 10 Hz, H-6e<sup>II</sup>), 3.91 (t, 1H, *J* = 9.3 Hz, H-4<sup>I</sup>), 3.78-3.62 (m, 5H, H-6a<sup>I</sup>, H-6e<sup>I</sup>, H-3<sup>II</sup>, H-4<sup>II</sup> and H-6a<sup>II</sup>), 3.58-3.52 (m, 1H, H-2<sup>I</sup>), 3.40 (d, 1H, *J* = 8.5 Hz, H-5<sup>I</sup>), 3.27-3.22 (m, 1H, H-5<sup>II</sup>), 2.72-2.49 (m, 4H), 2.16 (s, 3H), 1.60-1.56 (m, 1H), 0.85-0.81 (m, 12H), 0.15 (s, 3H), 0.09 (s, 3H); <sup>13</sup>C NMR (75 MHz, CDCl<sub>3</sub>): δ 206.29, 172.45, 154.28, 154.18, 138.32, 137.29, 131.58, 129.22, 128.60, 128.45, 128.40, 127.90, 127.79, 127.75, 126.19, 119.27, 101.35, 101.18 (C-1<sup>I</sup>), 96.26 (C-1<sup>II</sup>), 95.67, 81.31 (C-4<sup>II</sup>), 78.94 (C-3<sup>II</sup>), 77.40 (C-2<sup>II</sup>), 75.96 (C-4<sup>I</sup>), 74.84 (C-5<sup>I</sup>), 74.42, 73.49, 72.83 (C-3<sup>I</sup>), 68.92, 68.68 (C-6<sup>II</sup>), 67.95 (C-6<sup>I</sup>), 66.25 (C-5<sup>II</sup>), 58.48 (C-2<sup>I</sup>), 38.04, 34.16, 30.09, 28.19, 24.99, 20.19, 20.16, 18.69, -1.74, -3.19. HR MALDI-TOF MS: *m/z*: calcd for C<sub>53</sub>H<sub>68</sub>Cl<sub>3</sub>NO<sub>16</sub>Si [M+Na]<sup>+</sup>: 1130.3271; found: 1130.3321.

**Dimethylthexylsilyl *O*-(3-*O*-benzyl-4,6-*O*-benzylidene-β-D-glucopyranosyl)-(1→4)-6-*O*-benzyl-2-deoxy-3-*O*-levulinoyl-2-(2,2,2-trichloroethoxy)carbonylamino-β-D-**

**glucopyranoside (16).** To a stirred solution of **15** (565 mg, 0.509 mmol) in THF (10 mL) and water (1 mL) was added tetrakis(triphenylphosphine)palladium(0) (295 mg, 0.255 mmol) under an atmosphere of Ar. After stirring for 3 h, the reaction mixture was filtered through a short pad of silica gel and the filtrate was concentrated under reduced pressure. The resulting yellow oil was purified by flash chromatography over silica gel (EtOAc/hexanes, 2/5→1/2, v/v) to give **16** (475 mg, 91%) as an amorphous white solid: *R<sub>f</sub>* = 0.29 (EtOAc/hexanes, 2/5, v/v). <sup>1</sup>H NMR (500 MHz, CDCl<sub>3</sub>): δ 7.46-7.23 (m, 15H), 5.52 (s, 1H, >CHPh), 5.36 (br s, 1H, NHTroc), 5.17 (t, 1H, *J* = 10 Hz, H-3<sup>I</sup>), 4.92-4.55 (m, 7H, H-1<sup>I</sup>, OCH<sub>2</sub>CCl<sub>3</sub> and two OCH<sub>2</sub>Ph), 4.36 (d, 1H, *J* = 6.5 Hz, H-1<sup>II</sup>), 4.28 (dd, 1H, *J* = 5 Hz and 10.5 Hz, H-6e<sup>II</sup>), 3.82 (br s, 3H, H-4<sup>I</sup>, H-6a<sup>I</sup> and H-6e<sup>I</sup>), 3.73 (t,

1H,  $J = 10.3$  Hz, H-6a<sup>II</sup>), 3.62-3.59 (m, 3H, H-2<sup>I</sup>, H-5<sup>I</sup> and H-4<sup>II</sup>), 3.53 (t, 1H,  $J = 8.8$  Hz, H-3<sup>II</sup>), 3.41-3.38 (m, 1H, H-2<sup>II</sup>), 3.32-3.27 (m, 1H, H-5<sup>II</sup>), 2.71-2.51 (m, 4H), 2.15 (s, 3H), 1.62-1.57 (m, 1H), 0.85-0.82 (m, 12H), 0.16 (s, 3H), 0.11 (s, 3H); <sup>13</sup>C NMR (75 MHz, CDCl<sub>3</sub>):  $\delta$  205.88, 173.25, 154.58, 138.85, 137.76, 137.40, 129.12, 128.58, 128.37, 128.33, 127.92, 127.86, 127.59, 126.19, 104.35 (C-1<sup>I</sup>), 101.28, 96.07 (C-1<sup>II</sup>), 95.86, 81.43 (C-4<sup>II</sup>), 80.80 (C-3<sup>II</sup>), 77.52 (C-4<sup>I</sup>), 74.82, 74.64 (C-5<sup>I</sup>), 74.29 (C-2<sup>II</sup>), 73.80, 73.58 (C-3<sup>I</sup>), 68.80 (C-6<sup>II</sup>), 68.41 (C-6<sup>I</sup>), 66.46 (C-5<sup>II</sup>), 58.12, (C-2<sup>I</sup>), 37.94, 34.17, 30.04, 28.15, 24.90, 20.24, 20.17, 18.74, 18.70 -1.58, -2.89. HR MALDI-TOF MS:  $m/z$ : calcd for C<sub>49</sub>H<sub>64</sub>Cl<sub>3</sub>NO<sub>14</sub>Si [M+Na]<sup>+</sup>: 1046.3059; found: 1046.3082.

**Dimethylhexylsilyl** ***O*-(2-azido-3-*O*-benzyl-4,6-*O*-benzylidene-2-deoxy- $\beta$ -D-mannopyranosyl)-(1 $\rightarrow$ 4)-6-*O*-benzyl-2-deoxy-3-*O*-levulinoyl-2-(2,2,2-trichloroethoxy)carbonylamino- $\beta$ -D-glucopyranoside (17)**. To a stirred and cooled (0 °C) solution of **16** (455 mg, 0.444 mmol) and 4-dimethylaminopyridine (6.5 mg, 0.053 mmol) in DCM (6 mL) and pyridine (1.5 mL) under an atmosphere of Ar were added triflic anhydride (0.38 mL, 2.3 mmol) slowly. After stirring for 3 h, the reaction mixture was diluted with DCM (180 mL) and washed with saturated NaHCO<sub>3</sub> (2  $\times$  150 mL), brine (150 mL). The organic layer was dried (MgSO<sub>4</sub>), filtered and the filtrate was concentrated under reduced pressure to afford an amorphous yellow solid. To a stirred solution of the crude product in DMF (8 mL) was added sodium azide (175 mg, 2.69 mmol). After stirring at 55 °C for 18 h, the reaction mixture was diluted with DCM (180 mL) and was washed with water (150 mL) and brine (150 mL). The organic phase was dried (MgSO<sub>4</sub>), filtered and the filtrate was concentrated under reduced pressure. The resulting yellow oil was purified by flash chromatography over silica gel (EtOAc/hexanes, 1/4, v/v) to give **17** (401 mg, 86% over 2 steps) as an amorphous white solid:  $R_f = 0.20$  (EtOAc/hexanes, 1/4, v/v). <sup>1</sup>H NMR (500 MHz, CDCl<sub>3</sub>):  $\delta$  7.47-7.23 (m, 15H), 5.54 (s,

1H, >CHPh), 5.15 (t, 1H,  $J = 10$  Hz, H-3<sup>I</sup>), 5.04 (d, 1H,  $J = 8.5$  Hz, NHTroc), 4.79-4.46 (m, 7H, H-1<sup>I</sup>, OCH<sub>2</sub>CCl<sub>3</sub> and two OCH<sub>2</sub>Ph), 4.55 (s, 1H, H-1<sup>II</sup>), 4.25 (dd, 1H,  $J = 4.8$  Hz and 10.3 Hz, H-6e<sup>II</sup>), 3.97 (t, 1H,  $J = 9.5$  Hz, H-4<sup>I</sup>), 3.87 (t, 1H,  $J = 9.5$  Hz, H-4<sup>II</sup>), 3.79-3.66 (m, 4H, H-6a<sup>I</sup>, H-6e<sup>I</sup>, H-2<sup>II</sup> and H-6a<sup>II</sup>), 3.63-3.50 (m, 3H, H-2<sup>I</sup>, H-5<sup>I</sup> and H-3<sup>II</sup>), 3.18-3.14 (m, 1H, H-5<sup>II</sup>), 2.80-2.49 (m, 4H), 2.15 (s, 3H), 1.62-1.57 (m, 1H), 0.85-0.81 (m, 12H), 0.16 (s, 3H), 0.11 (s, 3H); <sup>13</sup>C NMR (75 MHz, CDCl<sub>3</sub>):  $\delta$  206.44, 172.53, 154.35, 138.02, 137.92, 137.40, 129.15, 128.71, 128.63, 128.39, 128.16, 128.01, 127.97, 127.72, 126.19, 101.69, 99.82 (C-1<sup>II</sup>), 96.40 (C-1<sup>I</sup>), 95.64, 78.48 (C-4<sup>II</sup>), 76.58 (C-3<sup>II</sup>), 75.55 (C-4<sup>I</sup>), 74.82, 74.35 (C-5<sup>I</sup>), 73.86, 72.95, 72.62 (C-3<sup>I</sup>), 68.75 (C-6<sup>I</sup>), 68.51 (C-6<sup>II</sup>), 67.41 (C-5<sup>II</sup>), 63.58 (C-2<sup>II</sup>), 58.36 (C-2<sup>I</sup>), 38.12, 34.14, 30.03, 28.31, 24.95, 20.16, 20.13, 18.68, -1.75, -3.15. HR MALDI-TOF MS:  $m/z$ : calcd for C<sub>49</sub>H<sub>63</sub>Cl<sub>3</sub>N<sub>4</sub>O<sub>13</sub>Si [M+Na]<sup>+</sup>: 1071.3124; found: 1071.3166.

**Dimethylthexylsilyl *O*-(2-azido-3,6-di-*O*-benzyl-2-deoxy- $\beta$ -D-mannopyranosyl)-(1 $\rightarrow$ 4)-6-*O*-benzyl-2-deoxy-3-*O*-levulinoyl-2-(2,2,2-trichloroethoxy)carbonylamino- $\beta$ -D-**

**glucopyranoside (18).** According to general procedure for reductive opening of a 4,6-benzylidene, compound **18** was prepared from a mixture of the compound **17** (250 mg, 0.24 mmol) and 4 Å molecular sieves (380 mg) in DCM (8 mL) with triethylsilane (96  $\mu$ L, 0.60 mmol) and triflic acid (47  $\mu$ L, 0.53 mmol). The reaction was warmed to -40 °C over a period of 1 h. The resulting yellow oil was purified by flash chromatography over silica gel (EtOAc/hexanes, 1/2, v/v) to give **18** (163 mg, 65%) as an amorphous white solid:  $R_f = 0.31$  (EtOAc/hexanes, 1/2, v/v).

<sup>1</sup>H NMR (500 MHz, CDCl<sub>3</sub>):  $\delta$  7.36-7.23 (m, 15H), 5.15 (t, 1H,  $J = 10$  Hz, H-3<sup>I</sup>), 4.97 (d, 1H,  $J = 8.5$  Hz, NHTroc), 4.72-4.48 (m, 10H, H-1<sup>I</sup>, H-1<sup>II</sup>, three OCH<sub>2</sub>Ph and OCH<sub>2</sub>CCl<sub>3</sub>), 3.98 (t, 1H,  $J = 9.5$  Hz, H-4<sup>I</sup>), 3.77-3.66 (m, 6H, H-6a<sup>I</sup>, H-6e<sup>I</sup>, H-2<sup>II</sup>, H-4<sup>II</sup>, H-6a<sup>II</sup> and H-6e<sup>II</sup>), 3.63-3.54 (m, 2H, H-2<sup>I</sup> and H-5<sup>I</sup>), 3.31-3.24 (m, 1H, H-3<sup>II</sup> and H-5<sup>II</sup>), 2.65-2.46 (m, 4H), 2.04 (s, 3H), 1.61-

1.56 (m, 1H), 0.85-0.81 (m, 12H), 0.15 (s, 3H), 0.09 (s, 3H);  $^{13}\text{C}$  NMR (75 MHz,  $\text{CDCl}_3$ ):  $\delta$  206.74, 172.91, 154.33, 138.10, 138.06, 137.69, 128.80, 128.67, 128.66, 128.29, 128.04, 128.02, 127.94, 127.73, 98.84 (C-1<sup>II</sup>), 96.51 (C-1<sup>I</sup>), 95.66, 80.64 (C-3<sup>II</sup>), 74.92, 74.87 (C-4<sup>I</sup>), 74.84 (C-5<sup>I</sup> and C-5<sup>II</sup>), 74.48, 73.83, 73.60, 72.08 (C-3<sup>I</sup>), 70.30 (C-6<sup>II</sup>), 68.94 (C-6<sup>I</sup>), 67.98 (C-4<sup>II</sup>), 61.23 (C-2<sup>II</sup>), 58.47 (C-2<sup>I</sup>), 38.05, 34.15, 29.85, 28.10, 24.96, 20.16, 18.69, -1.73, -3.18. HR MALDI-TOF MS:  $m/z$ : calcd for  $\text{C}_{49}\text{H}_{65}\text{Cl}_3\text{N}_4\text{O}_{13}\text{Si}$   $[\text{M}+\text{Na}]^+$ : 1073.3281; found: 1073.3255.

**Dimethylhexylsilyl *O*-[2-azido-6-*O*-benzyl-2-deoxy-4-*O*-(9-fluorenylmethyloxycarbonyl)-3-*O*-(2-methylnaphthyl)- $\alpha$ -D-glucopyranosyl]-(1 $\rightarrow$ 4)-*O*-(2-azido-3,6-di-*O*-benzyl-2-deoxy- $\beta$ -D-mannopyranosyl)-(1 $\rightarrow$ 4)-6-*O*-benzyl-2-deoxy-3-*O*-levulinoyl-2-(2,2,2-trichloroethoxy)carbonylamino- $\beta$ -D-glucopyranoside (**8**).** According to general procedure of TMSOTf-mediated glycosylation for synthesis of  $\alpha$ -anomers, compound **8** was prepared from a mixture of the acceptor **18** (0.100 g, 0.0950 mmol) and trichloroacetimidate **11** (152 mg, 0.190 mmol), 4 Å molecular sieves (380 g) in a mixture  $\text{Et}_2\text{O}/\text{DCM}$  (6 mL) with catalytic TMSOTf (6.5  $\mu\text{L}$ , 0.036 mmol). The reaction time was 1.5 h. The resulting yellow oil, a separable mixture of  $\alpha$ - and  $\beta$ -anomer ( $\alpha/\beta = 8/1$ ), was purified by flash chromatography over silica gel twice (1<sup>st</sup> time:  $\text{EtOAc}/\text{hexanes}$ , 1/3, v/v; 2<sup>nd</sup> time:  $\text{acetone}/\text{toluene}$ , 0/1 $\rightarrow$ 1/40) to give **8** (87 mg, 54% of  $\alpha$ -anomer after purification) as an amorphous white solid:  $R_f = 0.28$  ( $\text{acetone}/\text{toluene}$ , 1/15, v/v).  $^1\text{H}$  NMR (500 MHz,  $\text{CDCl}_3$ ):  $\delta$  7.73-7.13 (m, 35H), 5.67 (d, 1H,  $J = 4$  Hz, H-1<sup>III</sup>), 5.18 (t, 1H,  $J = 10$  Hz, H-3<sup>I</sup>), 5.01 (d, 1H,  $J = 9.0$  Hz, *NHTroc*), 4.98 (t, 1H,  $J = 9.8$  Hz, H-4<sup>III</sup>), 4.92-4.77 (m, 2H,  $\text{OCH}_2\text{Nap}$ ), 4.69-4.65 (m, 4H, H-1<sup>I</sup>, H-1<sup>II</sup> and  $\text{OCH}_2\text{CCl}_3$ ), 4.55-4.50 (m, 6H, three  $\text{OCH}_2\text{Ph}$ ), 4.36-4.14 (m, 4H,  $\text{OCH}_2\text{Ph}$  and  $\text{CH}_2\text{CHFmoc}$ ), 4.03-3.91 (m, 4H, H-4<sup>I</sup>, H-4<sup>II</sup>, H-3<sup>III</sup> and  $\text{CH}_2\text{CHFmoc}$ ), 3.81-3.79 (m, 2H, H-2<sup>II</sup> and H-5<sup>III</sup>), 3.72-3.57 (m, 7H, H-2<sup>I</sup>, H-5<sup>I</sup>, H-6a<sup>I</sup>, H-6e<sup>I</sup>, H-3<sup>II</sup>, H-6a<sup>II</sup> and H-6e<sup>II</sup>), 3.35-3.26 (m, 4H, H-5<sup>II</sup>, H-2<sup>III</sup>, H-6a<sup>III</sup> and H-6e<sup>III</sup>), 2.60-2.33 (m, 4H),

2.00 (s, 3H), 1.62-1.56 (m, 1H), 0.85-0.81 (m, 12H), 0.16 (s, 3H), 0.10 (s, 3H); <sup>13</sup>C NMR (75 MHz, CDCl<sub>3</sub>): δ 206.72, 173.08, 154.34, 154.31, 143.40, 143.32, 141.46, 138.26 138.11, 137.94, 137.15, 135.19, 133.40, 133.18, 128.79, 128.76, 128.64, 128.40, 128.35, 128.30, 128.24, 128.12, 128.10, 128.07, 128.02, 127.84, 127.80, 127.72, 127.38, 127.32, 126.76, 126.24, 126.10, 125.88, 125.20, 125.11, 120.23, 98.45 (C-1<sup>II</sup>), 97.75 (C-1<sup>III</sup>), 96.56 (C-1<sup>I</sup>), 95.66, 82.29 (C-3<sup>II</sup>), 77.78 (C-3<sup>III</sup>), 75.50 (C-4<sup>III</sup>), 75.03, 74.93 (C-4<sup>I</sup> and C-5<sup>II</sup>), 74.79 (C-5<sup>I</sup>), 74.54, 73.92, 73.72, 73.23, 71.93 (C-3<sup>I</sup>), 71.63, 70.91 (C-4<sup>II</sup>), 70.11, 69.65 (C-5<sup>III</sup>), 69.01 (C-6<sup>I and II</sup>), 68.50 (C-6<sup>III</sup>), 62.95 (C-2<sup>III</sup>), 60.87 (C-2<sup>II</sup>), 58.59 (C-2<sup>I</sup>), 46.80, 37.93, 34.19, 29.82, 27.99, 25.01, 20.20, 18.72, -1.68, -3.18. HR MALDI-TOF MS: m/z: calcd for C<sub>88</sub>H<sub>98</sub>Cl<sub>3</sub>N<sub>7</sub>O<sub>19</sub>Si [M+Na]<sup>+</sup>: 1712.5650; found: 1712.5682.

***O*-[2-Azido-6-*O*-benzyl-2-deoxy-4-*O*-(9-fluorenylmethyloxycarbonyl)-3-*O*-(2-methylnaphthyl)- $\alpha$ -D-glucopyranosyl]-(1 $\rightarrow$ 4)-*O*-(2-azido-3,6-di-*O*-benzyl-2-deoxy- $\beta$ -D-mannopyranosyl)-(1 $\rightarrow$ 4)-6-*O*-benzyl-2-deoxy-3-*O*-levulinoyl-2-(2,2,2-**

**trichloroethoxy)carbonylamino- $\beta$ -D-glucopyranosyl Trichloroacetimidate (20).** To a stirred and cooled (0° C) solution of **8** (185 mg, 0.109 mmol) in THF (5 mL) was added HF·Py (1 mL) under an atmosphere of Ar. After stirring at room temperature for 12 h, the mixture was diluted with DCM (150 mL) and washed with saturated NaHCO<sub>3</sub> (2  $\times$  120 mL), brine (120 mL). The organic layer was dried (MgSO<sub>4</sub>), filtered and the filtrate was concentrated under reduced pressure. The resulting yellow oil was purified by flash chromatography over silica gel (EtOAc/hexanes, 1/2 $\rightarrow$ 2/3, v/v) to give **19** (156 mg, 92%) as an inseparable mixture of  $\alpha$ - and  $\beta$ -anomer as an amorphous white solid: *R<sub>f</sub>* = 0.24 (EtOAc/hexanes, 2/3, v/v). HR MALDI-TOF MS: m/z: calcd for C<sub>80</sub>H<sub>80</sub>Cl<sub>3</sub>N<sub>7</sub>O<sub>19</sub> [M+Na]<sup>+</sup>: 1570.4472; found: 1570.4521. To a stirred solution of  $\alpha$ - and  $\beta$ -hemiacetals **19** (156 mg, 0.100 mmol) in DCM (3.9 mL) was added trichloroacetonitrile (0.10 mL, 1.0 mmol) followed by potassium carbonate (69 mg, 0.50 mmol) under an atmosphere

of Ar. After stirring for 2 h, the reaction mixture was filtered, and the filtrate was concentrated under reduced pressure. The resulting yellow oil was purified by flash chromatography over silica gel (EtOAc/hexanes, 1/2, v/v) to give **20** (155 mg, 91%) as an amorphous white solid:  $R_f = 0.35$  (EtOAc/hexanes, 1/2, v/v).  $^1\text{H NMR}$  (500 MHz,  $\text{CDCl}_3$ ):  $\delta$  8.74 (s, 1H), 7.75-7.15 (m, 35H), 6.42 (d, 1H,  $J = 3$  Hz, H-1<sup>I</sup>), 5.69 (d, 1H,  $J = 3.5$  Hz, H-1<sup>III</sup>), 5.39 (t, 1H,  $J = 10.3$  Hz, H-3<sup>I</sup>), 5.21 (d, 1H,  $J = 9$  Hz, *NHTroc*), 5.01 (t, 1H,  $J = 9.8$  Hz, H-4<sup>III</sup>), 4.93 (d, 1H,  $J = 11$  Hz, *OCHHNap*), 4.86-4.80 (m, 2H, *OCH<sub>2</sub>CCl<sub>3</sub>*), 4.71 (d, 1H,  $J = 12$  Hz, *OCHHPh*), 4.65 (d, 1H,  $J = 12$  Hz, *OCHHNap*), 4.53-4.18 (m, 12H, H-2<sup>I</sup>, H-4<sup>I</sup>, H-1<sup>II</sup>, *CH<sub>2</sub>CHFmoc* and seven protons from *OCH<sub>2</sub>Ph*), 4.08-3.94 (m, 4H, H-5<sup>I</sup>, H-4<sup>II</sup>, H-3<sup>III</sup> and *CH<sub>2</sub>CHFmoc*), 3.83-3.68 (m, 6H, H-6a<sup>I</sup>, H-6e<sup>I</sup>, H-2<sup>II</sup>, H-6a<sup>II</sup>, H-6e<sup>II</sup> and H-5<sup>III</sup>), 3.60 (dd, 1H,  $J = 3.3$  Hz and 8.8 Hz, H-3<sup>II</sup>), 3.38-3.29 (m, 4H, H-5<sup>II</sup>, H-2<sup>III</sup>, H-6a<sup>III</sup> and H-6e<sup>III</sup>), 2.62-2.26 (m, 4H), 2.00 (s, 3H);  $^{13}\text{C NMR}$  (HSQC, 125 MHz,  $\text{CDCl}_3$ ):  $\delta$  128.88, 128.56, 128.28, 128.22, 127.96, 127.85, 127.78, 127.37, 126.87, 126.11, 125.18, 120.23, 98.60 (C-1<sup>II</sup>), 97.74 (C-1<sup>III</sup>), 95.32 (C-1<sup>I</sup>), 82.39 (C-3<sup>II</sup>), 77.76 (C-3<sup>III</sup>), 75.59 (C-4<sup>III</sup>), 75.17 (C-5<sup>II</sup>), 75.04, 74.49, 74.14, 73.84, 73.48 (C-4<sup>I</sup>), 73.27, 72.85 (C-5<sup>I</sup>), 71.64, 70.80 (C-4<sup>II</sup>), 70.28 (C-3<sup>I</sup>), 70.18, 69.95 (C-6<sup>II</sup>), 69.70 (C-5<sup>III</sup>), 68.60 (C-6<sup>III</sup>), 68.13 (C-6<sup>I</sup>), 63.01 (C-2<sup>III</sup>), 60.66 (C-2<sup>II</sup>), 54.38 (C-2<sup>I</sup>), 46.89, 37.77, 29.80, 27.87.

***N*-Benzyl-*N*-benzyloxycarbonyl-5-aminopentyl**      ***O*-[2-azido-6-*O*-benzyl-2-deoxy-4-*O*-(9-fluorenylmethyloxycarbonyl)-3-*O*-(2-methylnaphthyl)- $\alpha$ -D-glucopyranosyl]-(1 $\rightarrow$ 4)-*O*-(2-azido-3,6-di-*O*-benzyl-2-deoxy- $\beta$ -D-mannopyranosyl)-(1 $\rightarrow$ 4)-6-*O*-benzyl-2-deoxy-3-*O*-levulinoyl-2-(2,2,2-trichloroethoxy)carbonylamino- $\beta$ -D-glucopyranoside (**21**). According to general procedure of TMSOTf-mediated glycosylation for synthesis of  $\beta$ -anomers, compound **21** was prepared from a mixture of *N*-benzyl-*N*-benzyloxycarbonyl-5-aminopentanol<sup>4</sup> (81 mg, 0.25 mmol) and donor **20** (140 mg, 0.083 mmol), 4 Å molecular sieves (330 mg) in DCM (4 mL) with**

catalytic TMSOTf (3.5  $\mu$ L, 0.019 mmol). The resulting yellow oil was purified by flash chromatography over silica gel (EtOAc/hexanes, 0/1 $\rightarrow$ 1/2, v/v) to give **21** (131 mg, 85%) as an amorphous white solid:  $R_f$  = 0.37 (EtOAc/hexanes, 1/2, v/v).  $^1\text{H}$  NMR (500 MHz,  $\text{CDCl}_3$ ):  $\delta$  7.68-7.09 (m, 45H), 5.61 (d, 1H,  $J$  = 3.5 Hz, H-1<sup>III</sup>), 5.34-5.07 (m, 4H, H-3<sup>I</sup>, *NHTroc* and *NC[=O]CH<sub>2</sub>Ph*), 4.93 (t, 1H,  $J$  = 9.5 Hz, H-4<sup>III</sup>), 4.87-4.72 (m, 2H, *OCH<sub>2</sub>Nap*), 4.66-4.59 (m, 2H, *OCH<sub>2</sub>CCl<sub>3</sub>*), 4.48-4.09 (m, 14H, H-1<sup>I</sup>, H-1<sup>II</sup>, *NCH<sub>2</sub>Ph*, *CH<sub>2</sub>CHFmoc* and four *OCH<sub>2</sub>Ph*), 3.95-3.87 (m, 4H, H-4<sup>I</sup>, H-4<sup>II</sup>, H-3<sup>III</sup> and *CH<sub>2</sub>CHFmoc*), 3.76-3.51 (m, 9H, H-2<sup>I</sup>, H-5<sup>I</sup>, H-6a<sup>I</sup>, H-6e<sup>I</sup>, H-2<sup>II</sup>, H-3<sup>II</sup>, H-6a<sup>II</sup> and H-6e<sup>II</sup> and H-5<sup>III</sup>), 3.29-3.10 (m, 8H, H-5<sup>II</sup>, H-2<sup>III</sup>, H-6a<sup>III</sup> and H-6e<sup>III</sup> and two *CH<sub>2</sub>-Linker*), 2.55-2.28 (m, 4H), 1.94 (s, 3H), 1.477-1.42 (m, 4H, two *CH<sub>2</sub>-Linker*), 1.24-1.17 (m, 2H, *CH<sub>2</sub>-Linker*);  $^{13}\text{C}$  NMR (75 MHz,  $\text{CDCl}_3$ ):  $\delta$  206.69, 172.86, 156.86, 156.41, 154.39, 154.26, 143.35, 143.27, 141.40, 138.26, 138.05, 137.99, 137.88, 137.12, 136.98, 135.13, 133.34, 133.13, 128.73, 128.71, 128.58, 128.35, 128.26, 128.17, 128.07, 128.00, 127.79, 127.74, 127.68, 127.46, 127.35, 127.26, 126.71, 126.19, 126.05, 125.83, 125.14, 125.05, 120.18, 101.29 (C-1<sup>I</sup>), 98.15 (C-1<sup>II</sup>), 97.70 (C-1<sup>III</sup>), 95.83, 82.21 (C-3<sup>II</sup>), 77.66 (C-3<sup>III</sup>), 75.47 (C-4<sup>III</sup>), 74.95, 74.77 (C-4<sup>I</sup> and C-5<sup>II</sup>), 74.63, 74.42 (C-5<sup>I</sup>), 73.83, 73.67, 73.15, 71.70 (C-3<sup>I</sup>), 71.53, 70.88 (C-4<sup>II</sup>), 70.05, 69.66, 69.60 (C-5<sup>III</sup>), 68.81 (C-6<sup>I</sup> and <sup>II</sup>), 68.48 (C-6<sup>III</sup>), 67.33, 62.90 (C-2<sup>III</sup>), 60.81 (C-2<sup>II</sup>), 56.59 (C-2<sup>I</sup>), 50.68, 50.47, 47.30, 46.75, 46.32, 37.89, 29.83, 29.76, 29.22, 29.00, 27.91, 27.36, 23.19. HR MALDI-TOF MS:  $m/z$ : calcd for  $\text{C}_{100}\text{H}_{103}\text{Cl}_3\text{N}_8\text{O}_{21}$   $[\text{M}+\text{Na}]^+$ : 1879.6201; found: 1879.6189.

***N*-Benzyl-*N*-benzyloxycarbonyl-5-aminopentyl *O*-[2-azido-6-*O*-benzyl-2-deoxy-3-*O*-(2-methylnaphthyl)- $\alpha$ -D-glucopyranosyl]-(1 $\rightarrow$ 4)-*O*-(2-azido-3,6-di-*O*-benzyl-2-deoxy- $\beta$ -D-mannopyranosyl)-(1 $\rightarrow$ 4)-6-*O*-benzyl-2-deoxy-3-*O*-levulinoyl-2-(2,2,2-trichloroethoxy)carbonylamino- $\beta$ -D-glucopyranoside (**22**).** To a stirred solution of **21** (164

mg, 0.0882 mmol) in DCM (8 mL) was added triethylamine (2 mL). After stirring for 2 h, the reaction mixture was concentrated under reduced pressure. The resulting yellow oil was purified by flash chromatography over silica gel (EtOAc/hexanes, 2/5→1/2, v/v) to give **22** (142 mg, 98%) as an amorphous white solid:  $R_f = 0.25$  (EtOAc/hexanes, 1/2, v/v).  $^1\text{H}$  NMR (500 MHz,  $\text{CDCl}_3$ ):  $\delta$  7.89-7.20 (m, 37H), 5.68 (d, 1H,  $J = 3.5$  Hz, H-1<sup>III</sup>), 5.41-5.00 (m, 6H, H-3<sup>I</sup>, *NHTroc*,  $\text{NC}=\text{O}]\text{CH}_2\text{Ph}$  and  $\text{OCH}_2\text{Nap}$ ), 4.81-4.28 (m, 14H, H-1<sup>I</sup>, H-1<sup>II</sup>,  $\text{OCH}_2\text{CCl}_3$ ,  $\text{NCH}_2\text{Ph}$  and four  $\text{OCH}_2\text{Ph}$ ), 4.10-4.01 (m, 2H, H-4<sup>I</sup>, H-4<sup>II</sup>), 3.85-3.61 (m, 11H, H-2<sup>I</sup>, H-5<sup>I</sup>, H-6a<sup>I</sup>, H-6e<sup>I</sup>, H-2<sup>II</sup>, H-3<sup>II</sup>, H-6a<sup>II</sup> and H-6e<sup>II</sup>, H-3<sup>III</sup>, H-4<sup>III</sup> and H-5<sup>III</sup>), 3.43-3.21 (m, 8H, H-5<sup>II</sup>, H-2<sup>III</sup>, H-6a<sup>III</sup> and H-6e<sup>III</sup> and two  $\text{CH}_2$ -Linker), 2.76-2.36 (m, 4H), 2.03 (s, 3H), 1.64-1.42 (m, 4H, two  $\text{CH}_2$ -Linker), 1.41-1.20 (m, 2H,  $\text{CH}_2$ -Linker);  $^{13}\text{C}$  NMR (75 MHz,  $\text{CDCl}_3$ ):  $\delta$  206.74, 172.93, 156.89, 156.45, 154.39, 138.40, 138.05, 137.98, 137.71, 137.17, 135.75, 133.49, 133.24, 128.72, 128.59, 128.56, 128.51, 128.27, 128.14, 128.10, 128.01, 127.99, 127.86, 127.83, 127.65, 127.47, 127.19, 126.95, 126.29, 126.14, 126.09, 101.32 (C-1<sup>I</sup>), 98.18 (C-1<sup>II</sup>), 97.84 (C-1<sup>III</sup>), 95.83, 82.34 (C-3<sup>II</sup>), 79.39 (C-3<sup>III</sup>), 75.20, 74.79 (C-4<sup>I</sup>), 74.65 (C-5<sup>I</sup> and C-5<sup>II</sup>), 74.45, 73.83, 73.22, 73.01 (C-4<sup>III</sup>), 71.67, 71.59 (C-3<sup>I</sup>), 70.57 (C-5<sup>III</sup>), 70.26, 70.17 (C-4<sup>II</sup>), 69.65, 69.53 (C-6<sup>III</sup>), 68.81 (C-6<sup>I</sup> and <sup>II</sup>), 67.34, 62.81 (C-2<sup>III</sup>), 60.87 (C-2<sup>II</sup>), 56.57 (C-2<sup>I</sup>), 50.70, 50.47, 47.31, 46.33, 37.85, 29.85, 29.74, 29.23, 29.02, 27.87, 27.37, 23.20. HR MALDI-TOF MS:  $m/z$ : calcd for  $\text{C}_{85}\text{H}_{93}\text{Cl}_3\text{N}_8\text{O}_{19}$   $[\text{M}+\text{Na}]^+$ : 1657.5520; found: 1657.5539.

***N*-Benzyl-*N*-benzyloxycarbonyl-5-aminopentyl *O*-(2-*O*-acetyl-3,4,6-tri-*O*-benzyl- $\beta$ -D-galactopyranosyl)-(1→4)-*O*-[2-azido-6-*O*-benzyl-2-deoxy-3-*O*-(2-methylnaphthyl)- $\alpha$ -D-glucopyranosyl]-(1→4)-*O*-(2-azido-3,6-di-*O*-benzyl-2-deoxy- $\beta$ -D-mannopyranosyl)-(1→4)-6-*O*-benzyl-2-deoxy-3-*O*-levulinoyl-2-(2,2,2-trichloroethoxy)carbonylamino- $\beta$ -D-glucopyranoside (**23**).** According to general procedure of TMSOTf-mediated glycosylation for



synthesis of  $\beta$ -anomers, compound **23** was prepared from a mixture of the acceptor **22** (131 mg, 0.0800 mmol) and trichloroacetimidate **13** (127 mg, 0.200 mmol), 4 Å molecular sieves (400 mg) in DCM (5 mL) with catalytic TMSOTf (7.2  $\mu$ L, 0.040 mmol). The resulting yellow oil was purified by flash chromatography over silica gel (EtOAc/hexanes, 1/2, v/v) to give **23** (149 mg, 88%) as an amorphous white solid:  $R_f$  = 0.28 (EtOAc/hexanes, 1/2, v/v).  $^1\text{H}$  NMR (500 MHz,  $\text{CDCl}_3$ ):  $\delta$  7.81-7.03 (m, 52H), 5.70 (d, 1H,  $J$  = 4 Hz, H-1<sup>III</sup>), 5.42-5.12 (m, 6H, H-3<sup>I</sup>, H-2<sup>IV</sup>, NHTroc, NC[=O]CH<sub>2</sub>Ph and OCHHNap), 4.96 (d, 1H,  $J$  = 11 Hz, OCHHPH), 4.83 (d, 1H,  $J$  = 11 Hz, OCHHNap), 4.75-4.42 (m, 17H, H-1<sup>I</sup>, H-1<sup>II</sup>, NCH<sub>2</sub>Ph, OCH<sub>2</sub>CCl<sub>3</sub> and eleven protons from OCH<sub>2</sub>Ph), 4.28 (d, 1H,  $J$  = 8 Hz, H-1<sup>IV</sup>), 4.14-4.11 (m, 2H, H-4<sup>II</sup> and OCHHPH), 4.05-3.56 (m, 16H, H-2<sup>I</sup>, H-4<sup>I</sup>, H-5<sup>I</sup>, H-6a<sup>I</sup>, H-6e<sup>I</sup>, H-2<sup>II</sup>, H-3<sup>II</sup>, H-6a<sup>II</sup>, H-6e<sup>II</sup>, H-3<sup>III</sup>, H-4<sup>III</sup>, H-4<sup>IV</sup>, H-5<sup>IV</sup>, H-6a<sup>IV</sup>, OCHHPH and CHH-Linker), 3.30-3.21 (m, 9H, H-5<sup>II</sup>, H-2<sup>III</sup>, H-5<sup>III</sup>, H-6a<sup>III</sup>, H-3<sup>IV</sup>, H-6e<sup>IV</sup> and three protons from CH<sub>2</sub>-Linker), 3.11 (dd, 1H,  $J$  = 5 Hz and 8.2 Hz, H-6e<sup>III</sup>), 2.57-2.30 (m, 4H), 2.03 (s, 3H), 1.88 (s, 3H), 1.64-1.41 (m, 4H, two CH<sub>2</sub>-Linker), 1.40-1.19 (m, 2H, CH<sub>2</sub>-Linker);  $^{13}\text{C}$  NMR (150 MHz,  $\text{CDCl}_3$ ):  $\delta$  206.74, 172.94, 172.85, 169.37, 156.89, 156.42, 154.47, 154.34, 138.89, 138.35, 138.17, 138.09, 138.03, 137.87, 137.15, 136.40, 133.43, 132.99, 128.74, 128.70, 128.60, 128.57, 128.50, 128.43, 128.38, 128.36, 128.33, 128.25, 128.19, 128.11, 128.08, 128.01, 128.00, 127.95, 127.87, 127.79, 127.77, 127.71, 127.65, 127.62, 127.50, 127.42, 127.38, 126.47, 126.41, 125.77, 125.58, 101.25 (C-1<sup>I</sup>), 100.79 (C-1<sup>IV</sup>), 98.09 (C-1<sup>II</sup>), 97.44 (C-1<sup>III</sup>), 95.82, 82.44, 80.56, 77.79, 76.75, 75.14, 74.97, 74.72, 74.59, 74.47, 73.83, 73.67, 73.41, 73.23, 72.72, 72.03, 71.85, 71.72, 71.40, 69.67, 69.25, 68.79, 67.93, 67.32, 67.10, 63.02, 61.01, 56.51, 50.68, 50.44, 47.29, 46.30, 37.82, 29.83, 29.76, 29.23, 28.95, 27.94, 27.87, 27.33, 23.18, 21.08. HR MALDI-TOF MS:  $m/z$ : calcd for C<sub>114</sub>H<sub>123</sub>Cl<sub>3</sub>N<sub>8</sub>O<sub>25</sub> [M+Na]<sup>+</sup>: 2131.7563; found: 2131.7597.

***N*-Benzyl-*N*-benzyloxycarbonyl-5-aminopentyl *O*-(2-*O*-acetyl-3,4,6-tri-*O*-benzyl- $\beta$ -D-galactopyranosyl)-(1 $\rightarrow$ 4)-*O*-(2-azido-6-*O*-benzyl-2-deoxy- $\alpha$ -D-glucopyranosyl)-(1 $\rightarrow$ 4)-*O*-(2-azido-3,6-di-*O*-benzyl-2-deoxy- $\beta$ -D-mannopyranosyl)-(1 $\rightarrow$ 4)-6-*O*-benzyl-2-deoxy-3-*O*-levulinoyl-2-(2,2,2-trichloroethoxy)carbonylamino- $\beta$ -D-glucopyranoside (**24**).** According to general procedure for deprotection of Nap ethers, compound **24** was prepared from **23** (124 mg, 0.0587 mmol) with DDQ (40 mg, 0.18 mmol) in a mixture of DCM/water (6 mL). The resulting yellow oil was purified by flash chromatography over silica gel (EtOAc/hexanes, 1/2, v/v) to give **24** (90.3 mg, 78%) as an amorphous white solid:  $R_f$  = 0.22 (EtOAc/hexanes, 1/2, v/v).  $^1\text{H}$  NMR (500 MHz,  $\text{CDCl}_3$ ):  $\delta$  7.42-7.19 (m, 45H), 5.67 (d, 1H,  $J$  = 3.5 Hz, H-1<sup>III</sup>), 5.32 and 4.91 (two br s, 1H, *NHTroc*), 5.37 (dd, 1H,  $J$  = 8 Hz and 10 Hz, H-2<sup>IV</sup>), 5.28-5.14 (m, 3H, H-3<sup>I</sup> and NC[=O]*CH*<sub>2</sub>Ph), 4.94 (d, 1H,  $J$  = 11.5 Hz, *OCHHP*h), 4.76-4.42 (m, 18H, H-1<sup>I</sup>, H-1<sup>II</sup>, *NCH*<sub>2</sub>Ph, *OCH*<sub>2</sub>*CCl*<sub>3</sub> and twelve protons from *OCH*<sub>2</sub>Ph.), 4.28 (d, 1H,  $J$  = 8 Hz, H-1<sup>IV</sup>), 4.22 (d, 1H,  $J$  = 12 Hz, *OCHHP*h), 4.11 (t, 1H,  $J$  = 9.3 Hz, H-4<sup>II</sup>), 4.02 (t, 2H,  $J$  = 9 Hz, H-4<sup>I</sup> and H-3<sup>III</sup>), 3.89 (d, 1H,  $J$  = 2.5 Hz, H-4<sup>IV</sup>), 3.86-3.59 (m, 13 H, H-2<sup>I</sup>, H-5<sup>I</sup>, H-6a<sup>I</sup>, H-6e<sup>I</sup>, H-2<sup>II</sup>, H-3<sup>II</sup>, H-6a<sup>II</sup> and H-6e<sup>II</sup>, H-4<sup>III</sup>, H-6a<sup>IV</sup>, H-6e<sup>IV</sup>, H-5<sup>IV</sup> and *CHH-Linker*), 3.48-3.22 (m, 8H, H-5<sup>II</sup>, H-5<sup>III</sup>, H-6a<sup>III</sup> and H-6e<sup>III</sup>, H-3<sup>IV</sup> and three protons from *CH*<sub>2</sub>-Linker), 3.13 (dd, 1H,  $J$  = 3.5 Hz and 10.5 Hz, H-2<sup>III</sup>), 2.57-2.29 (m, 4H), 2.01 (s, 3H), 1.81 (s, 3H), 1.73-1.45 (m, 4H, two *CH*<sub>2</sub>-Linker), 1.41-1.20 (m, 2H, *CH*<sub>2</sub>-Linker);  $^{13}\text{C}$  NMR (150 MHz,  $\text{CDCl}_3$ ):  $\delta$  206.83, 173.07, 172.97, 169.29, 156.93, 156.46, 154.47, 154.35, 138.40, 138.35, 138.12, 138.09, 137.91, 137.81, 137.52, 137.18, 137.12, 136.99, 128.80, 128.74, 128.72, 128.70, 128.60, 128.54, 128.52, 128.44, 128.41, 128.30, 128.27, 128.19, 128.16, 128.10, 128.04, 127.93, 127.81, 127.68, 127.58, 127.52, 127.47, 127.40, 127.20, 101.75 (C-1<sup>IV</sup>), 101.36 (C-1<sup>I</sup>), 98.26 (C-1<sup>II</sup>), 97.45 (C-1<sup>III</sup>), 95.86, 82.50, 80.93, 80.38, 74.80, 74.74, 74.66, 74.50, 74.11, 73.96, 73.89, 73.73, 72.75, 72.38, 72.31, 71.70, 71.21, 70.27, 69.70,

69.36, 68.92, 68.80, 68.63, 67.65, 67.36, 62.63, 61.02, 56.53, 50.72, 50.48, 47.33, 46.36, 37.83, 29.89, 29.85, 29.76, 29.55, 29.27, 29.01, 28.00, 27.86, 27.39, 23.22, 20.99. HR MALDI-TOF MS: m/z: calcd for C<sub>103</sub>H<sub>115</sub>Cl<sub>3</sub>N<sub>8</sub>O<sub>25</sub> [M+Na]<sup>+</sup>: 1991.6937; found: 1991.6949.

***N*-Benzyl-*N*-benzyloxycarbonyl-5-aminopentyl *O*-(2-*O*-acetyl-3,4,6-tri-*O*-benzyl- $\beta$ -D-galactopyranosyl)-(1 $\rightarrow$ 4)-[*O*-(2,3,4,6-tetra-*O*-benzyl- $\alpha$ -D-galactopyranosyl)-(1 $\rightarrow$ 3)]-*O*-(2-azido-6-*O*-benzyl-2-deoxy- $\alpha$ -D-glucopyranosyl)-(1 $\rightarrow$ 4)-*O*-(2-azido-3,6-di-*O*-benzyl-2-deoxy- $\beta$ -D-mannopyranosyl)-(1 $\rightarrow$ 4)-6-*O*-benzyl-2-deoxy-3-*O*-levulinoyl-2-(2,2,2-**

**trichloroethoxy)carbonylamino- $\beta$ -D-glucopyranoside (25).** According to general procedure of TMSOTf-mediated glycosylation for synthesis of  $\alpha$ -anomers, compound **25** was prepared from a mixture of the acceptor **24** (60.0 mg, 0.0304 mmol) and trichloroacetimidate **14** (52.1 mg, 0.0760 mmol), 4 Å molecular sieves (170 mg) in a mixture of Et<sub>2</sub>O/DCM (3mL) with catalytic TMSOTf (3.7  $\mu$ L, 0.0206 mmol). The reaction time was 2 h. The resulting yellow oil was purified by flash chromatography over silica gel (EtOAc/hexanes, 1/2, v/v) to give **25** (54.7 mg, 72%) as an amorphous white solid:  $R_f$  = 0.25 (EtOAc/hexanes, 1/2, v/v). <sup>1</sup>H NMR (600 MHz, CDCl<sub>3</sub>):  $\delta$  7.43-7.13 (m, 65H), 5.73 (s, 1H, H-1<sup>V</sup>), 5.65 (d, 1H,  $J$  = 3.6 Hz, H-1<sup>III</sup>), 5.55-5.15 (m, 5H, H-3<sup>I</sup>, H-2<sup>IV</sup>, NHTroc and NC[=O]CH<sub>2</sub>Ph), 4.85-4.35 (m, 27H, H-1<sup>I</sup>, H-1<sup>II</sup>, H-1<sup>IV</sup>, NCH<sub>2</sub>Ph, OCH<sub>2</sub>CCl<sub>3</sub> and twenty protons from OCH<sub>2</sub>Ph), 4.23 (t, 1H,  $J$  = 8.1 Hz, H-3<sup>III</sup>), 4.13-3.97 (m, 8H, H-4<sup>I</sup>, H-4<sup>II</sup>, H-4<sup>III</sup>, H-5<sup>IV</sup>, H-2<sup>V</sup>, H-3<sup>V</sup> and OCH<sub>2</sub>Ph), 3.90 (s, 1H, H-4<sup>V</sup>), 3.83 (s, 1H, H-4<sup>IV</sup>), 3.61-3.38 (m, 18H, H-2<sup>I</sup>, H-5<sup>I</sup>, H-6a<sup>I</sup>, H-6e<sup>I</sup>, H-2<sup>II</sup>, H-3<sup>II</sup>, H-6a<sup>II</sup>, H-6e<sup>II</sup>, H-2<sup>III</sup>, H-5<sup>III</sup>, H-6a<sup>III</sup>, H-6e<sup>III</sup>, H-6a<sup>IV</sup>, H-6e<sup>IV</sup>, H-6a<sup>V</sup>, H-6e<sup>V</sup> and CH<sub>2</sub>-Linker), 3.30-3.10 (m, 5H, H-5<sup>II</sup>, H-3<sup>IV</sup>, H-5<sup>V</sup> and CH<sub>2</sub>-Linker), 2.56-2.31 (m, 4H), 1.98 (s, 3H), 1.88 (s, 3H), 1.71-1.41 (m, 4H, two CH<sub>2</sub>-Linker), 1.42-1.22 (m, 2H, CH<sub>2</sub>-Linker); <sup>13</sup>C NMR (150 MHz, CDCl<sub>3</sub>):  $\delta$  206.68, 172.90, 172.81, 168.99, 156.88, 156.42, 154.46, 154.33, 139.28, 139.18, 139.01, 138.58, 138.55, 138.47, 138.20, 138.03, 138.00,

137.99, 137.87, 137.83, 137.30, 137.07, 136.93, 128.77, 128.70, 128.56, 128.51, 128.49, 128.33, 128.28, 128.27, 128.23, 128.21, 128.18, 128.14, 128.05, 127.99, 127.98, 127.94, 127.89, 127.85, 127.77, 127.72, 127.62, 127.57, 127.48, 127.31, 127.24, 127.20, 101.24 (C-1<sup>IV</sup>), 100.48 (C-1<sup>I</sup>), 98.16 (C-1<sup>II</sup>), 97.36 (C-1<sup>III</sup>), 96.43 (C-1<sup>V</sup>), 95.83, 82.04, 80.72, 78.42, 76.36, 75.85, 75.52, 75.10, 74.80, 74.65, 74.59, 74.49, 73.86, 73.64, 73.50, 73.29, 73.19, 72.45, 72.38, 71.93, 71.80, 71.72, 71.67, 71.45, 71.26, 70.42, 69.98, 69.47, 69.23, 68.78, 68.08, 68.03, 67.32, 62.64, 60.90, 56.48, 50.68, 50.44, 47.29, 46.31, 37.79, 29.84, 29.80, 29.73, 29.24, 28.96, 27.96, 27.85, 27.34, 23.19, 21.05. HR MALDI-TOF MS: m/z: calcd for C<sub>137</sub>H<sub>149</sub>Cl<sub>3</sub>N<sub>8</sub>O<sub>30</sub> [M+Na]<sup>+</sup>: 2513.9343; found: 2513.9377.

***N*-Benzyl-*N*-benzyloxycarbonyl-5-aminopentyl *O*-(2-*O*-acetyl-3,4,6-tri-*O*-benzyl- $\beta$ -D-galactopyranosyl)-(1 $\rightarrow$ 4)-[*O*-(2,3,4,6-tetra-*O*-benzyl- $\alpha$ -D-galactopyranosyl)-(1 $\rightarrow$ 3)]-*O*-(2-azido-6-*O*-benzyl-2-deoxy- $\alpha$ -D-glucopyranosyl)-(1 $\rightarrow$ 4)-*O*-(2-azido-3,6-di-*O*-benzyl-2-deoxy- $\beta$ -D-mannopyranosyl)-(1 $\rightarrow$ 4)-6-*O*-benzyl-2-deoxy-2-(2,2,2-trichloroethoxy)carbonylamino- $\beta$ -D-glucopyranoside (26).** According to general procedure for deprotection of Lev esters, compound **26** was prepared from **25** (50.2 mg, 0.0201 mmol) with hydrazine acetate (3.7 mg, 0.0402 mmol) in a mixture of MeOH/DCM (2 mL). The resulting yellow oil was purified by flash chromatography over silica gel (EtOAc/hexanes, 1/2, v/v) to give **26** (44.8 mg, 93%) as an amorphous white solid:  $R_f$  = 0.25 (EtOAc/hexanes, 1/2, v/v). <sup>1</sup>H NMR (600 MHz, CDCl<sub>3</sub>):  $\delta$  7.47-7.23 (m, 65H), 5.74 (s, 1H, H-1<sup>V</sup>), 5.61 (d, 1H,  $J$  = 3.6 Hz, H-1<sup>III</sup>), 5.54 (br s, 1H, NHTroc), 5.36 (t, 1H,  $J$  = 9 Hz, H-2<sup>IV</sup>), 5.30-5.26 (m, 2H, NC[=O]CH<sub>2</sub>Ph), 4.95-4.41 (m, 27H, H-1<sup>I</sup>, H-1<sup>II</sup>, H-1<sup>IV</sup>, NCH<sub>2</sub>Ph, OCH<sub>2</sub>CCl<sub>3</sub> and ten OCH<sub>2</sub>Ph), 4.33-3.21 (m, 35H, H-2<sup>I</sup>, H-3<sup>I</sup>, H-4<sup>I</sup>, H-5<sup>I</sup>, H-6a<sup>I</sup>, H-6e<sup>I</sup>, H-2<sup>II</sup>, H-3<sup>II</sup>, H-4<sup>II</sup>, H-5<sup>II</sup>, H-6a<sup>II</sup>, H-6e<sup>II</sup>, H-2<sup>III</sup>, H-3<sup>III</sup>, H-4<sup>III</sup>, H-5<sup>III</sup>, H-6a<sup>III</sup>, H-6e<sup>III</sup>, H-3<sup>IV</sup>, H-4<sup>IV</sup>, H-5<sup>IV</sup>, H-6a<sup>IV</sup>, H-6e<sup>IV</sup>, H-2<sup>V</sup>, H-3<sup>V</sup>, H-4<sup>V</sup>, H-5<sup>V</sup>, H-6a<sup>V</sup>, H-6e<sup>V</sup>, OCH<sub>2</sub>Ph and two CH<sub>2</sub>-

Linker), 1.98 (s, 3H), 1.74-1.43 (m, 4H, two  $CH_2$ -Linker), 1.40-1.22 (m, 2H,  $CH_2$ -Linker);  $^{13}C$  NMR (150 MHz,  $CDCl_3$ ):  $\delta$  169.14, 168.92, 156.89, 156.36, 154.30, 154.17, 139.22, 139.16, 138.98, 138.57, 138.56, 138.19, 138.06, 138.04, 138.03, 137.84, 137.23, 137.09, 137.05, 136.91, 128.77, 128.74, 128.71, 128.56, 128.54, 128.53, 128.35, 128.32, 128.25, 127.99, 127.94, 127.92, 127.86, 127.85, 127.82, 127.67, 127.57, 127.49, 127.38, 127.33, 127.28, 100.70 (C-1<sup>II</sup> and C-1<sup>IV</sup>), 100.01 (C-1<sup>I</sup>), 97.71 (C-1<sup>III</sup>), 96.67 (C-1<sup>V</sup>), 95.78, 82.02, 81.52, 80.64, 78.56, 76.36, 76.16, 75.00, 74.86, 74.71, 74.65, 74.62, 74.59, 73.97, 73.74, 73.71, 73.59, 73.53, 73.44, 73.32, 72.60, 72.39, 71.90, 71.84, 71.75, 71.38, 70.58, 69.76, 69.38, 68.63, 68.18, 67.33, 62.12, 61.27, 58.05, 50.68, 50.45, 47.39, 46.30, 29.86, 29.82, 29.52, 29.29, 29.10, 28.00, 27.37, 23.26, 21.09. HR MALDI-TOF MS: m/z: calcd for  $C_{132}H_{143}Cl_3N_8O_{28}$   $[M+Na]^+$ : 2415.8975; found: 2415.9011.

***N*-Benzyl-*N*-benzyloxycarbonyl-5-aminopentyl *O*-(2-*O*-acetyl-3,4,6-tri-*O*-benzyl- $\beta$ -D-galactopyranosyl)-(1 $\rightarrow$ 4)-[*O*-(2,3,4,6-tetra-*O*-benzyl- $\alpha$ -D-galactopyranosyl)-(1 $\rightarrow$ 3)]-*O*-(2-azido-6-*O*-benzyl-2-deoxy- $\alpha$ -D-glucopyranosyl)-(1 $\rightarrow$ 4)-*O*-(2-azido-3,6-di-*O*-benzyl-2-deoxy- $\beta$ -D-mannopyranosyl)-(1 $\rightarrow$ 4)-[*O*-(2,3,4,6-tetra-*O*-benzyl- $\alpha$ -D-galactopyranosyl)-(1 $\rightarrow$ 3)]-6-*O*-benzyl-2-deoxy-2-(2,2,2-trichloroethoxy)carbonylamino- $\beta$ -D-glucopyranoside (27).**

According to general procedure of TMSOTf-mediated glycosylation for synthesis of  $\alpha$ -anomers, compound **27** was prepared from a mixture of the acceptor **26** (40.0 mg, 0.0167 mmol) and trichloroacetimidate **14** (34.3 mg, 0.0501 mmol), 4 Å molecular sieves (130 mg) in a mixture of  $Et_2O/DCM$  (2mL) with catalytic TMSOTf (2.3  $\mu$ L, 0.0206 mmol). The reaction time was 2 h. The resulting yellow oil, a separable mixture of  $\alpha$ - and  $\beta$ -anomer ( $\alpha/\beta > 20/1$ ), was purified by flash chromatography over silica gel ( $EtOAc/hexanes$ , 2/5, v/v) to give **27** (31.7 mg, 65% of  $\alpha$ -anomer after purification) as an amorphous white solid:  $R_f = 0.30$  ( $EtOAc/hexanes$ , 1/2, v/v).  $^1H$  NMR (600 MHz,  $CDCl_3$ ):  $\delta$  7.42-7.11 (m, 85H), 6.26 (br s, 1H, *NHTroc*), 5.72 (s, 1H, H-1<sup>V</sup>),

5.61 (d, 1H,  $J = 4.2$  Hz, H-1<sup>III</sup>), 5.23 (dd, 1H,  $J = 8.4$  and  $9.6$  Hz, H-2<sup>IV</sup>), 5.17-5.14 (m, 3H, H-1<sup>VI</sup> and NC[=O]CH<sub>2</sub>Ph), 4.90-4.43 (m, 33H, H-1<sup>II</sup>, NCH<sub>2</sub>Ph, OCH<sub>2</sub>CCl<sub>3</sub> and fourteen OCH<sub>2</sub>Ph), 4.39-3.05 (m, 42H, H-1<sup>I</sup>, H-2<sup>I</sup>, H-3<sup>I</sup>, H-4<sup>I</sup>, H-5<sup>I</sup>, H-6a<sup>I</sup>, H-6e<sup>I</sup>, H-2<sup>II</sup>, H-3<sup>II</sup>, H-4<sup>II</sup>, H-5<sup>II</sup>, H-6a<sup>II</sup>, H-6e<sup>II</sup>, H-2<sup>III</sup>, H-3<sup>III</sup>, H-4<sup>III</sup>, H-5<sup>III</sup>, H-6a<sup>III</sup>, H-6e<sup>III</sup>, H-1<sup>IV</sup>, H-3<sup>IV</sup>, H-4<sup>IV</sup>, H-5<sup>IV</sup>, H-6a<sup>IV</sup>, H-6e<sup>IV</sup>, H-2<sup>V</sup>, H-3<sup>V</sup>, H-4<sup>V</sup>, H-5<sup>V</sup>, H-6a<sup>V</sup>, H-6e<sup>V</sup>, H-2<sup>VI</sup>, H-3<sup>VI</sup>, H-4<sup>VI</sup>, H-5<sup>VI</sup>, H-6a<sup>VI</sup>, H-6e<sup>VI</sup>, OCH<sub>2</sub>Ph and two CH<sub>2</sub>-Linker), 1.85 (s, 3H), 1.69-1.60 (m, 4H, two CH<sub>2</sub>-Linker), 1.40-1.22 (m, 2H, CH<sub>2</sub>-Linker); <sup>13</sup>C NMR (150 MHz, CDCl<sub>3</sub>):  $\delta$  168.97, 156.87, 156.31, 154.19, 139.39, 139.24, 139.11, 138.99, 138.79, 138.68, 138.66, 138.48, 138.32, 138.25, 138.11, 138.09, 137.04, 128.76, 128.73, 128.60, 128.56, 128.55, 128.51, 128.45, 128.40, 128.37, 128.33, 128.31, 128.29, 128.28, 128.25, 128.20, 128.19, 128.14, 128.10, 128.03, 128.01, 127.99, 127.95, 127.89, 127.86, 127.82, 127.79, 127.77, 127.75, 127.70, 127.63, 127.53, 127.35, 127.25, 127.19, 101.01 (C-1<sup>IV</sup>), 100.58 (C-1<sup>I</sup>), 98.68 (C-1<sup>VI</sup>), 97.93 (C-1<sup>II</sup>), 97.37 (C-1<sup>III</sup>), 96.54 (C-1<sup>V</sup>), 96.08, 92.15, 82.63, 80.77, 79.36, 78.92, 78.44, 76.30, 76.07, 75.89, 75.73, 75.63, 75.29, 74.85, 74.79, 74.75, 74.70, 74.37, 74.18, 73.73, 73.70, 73.57, 73.53, 73.47, 73.33, 73.26, 72.87, 72.43, 71.91, 71.85, 71.83, 71.13, 70.43, 70.27, 69.88, 69.56, 69.26, 69.08, 68.02, 67.31, 62.74, 60.87, 54.80, 50.67, 50.38, 47.35, 46.37, 32.13, 29.85, 29.42, 29.30, 29.10, 28.00, 27.37, 23.26, 21.09. HR MALDI-TOF MS:  $m/z$ : calcd for C<sub>166</sub>H<sub>177</sub>Cl<sub>3</sub>N<sub>8</sub>O<sub>33</sub> [M+Na]<sup>+</sup>: 2938.1381; found: 2938.1432.

**5-Aminopentyl O-( $\beta$ -D-galactopyranosyl)-(1 $\rightarrow$ 4)-[O-( $\alpha$ -D-galactopyranosyl)-(1 $\rightarrow$ 3)]-O-(2-acetamido-2-deoxy- $\alpha$ -D-glucopyranosyl)-(1 $\rightarrow$ 4)-O-(2-acetamido-2-deoxy- $\beta$ -D-mannopyranosyl)-(1 $\rightarrow$ 4)-[O-( $\alpha$ -D-galactopyranosyl)-(1 $\rightarrow$ 3)]-2-acetamido-2-deoxy- $\beta$ -D-glucopyranoside (1).** According to general procedure for reduction of azido and Troc groups, compound **28** was prepared from **27** (31.7 mg, 0.0109 mmol) with zinc metal powder (35 mg, 0.54 mmol) in AcOH/Ac<sub>2</sub>O/THF (4 mL) and saturated CuSO<sub>4(aq)</sub> (0.2 mL). The resulting yellow oil

was purified by flash chromatography over silica gel (MeOH/DCM, 1/30, v/v) to give **28** (22.0 mg, 72%) as an amorphous white solid:  $R_f = 0.29$  (MeOH/DCM, 1/15, v/v). HR MALDI-TOF MS:  $m/z$ : calcd for  $C_{169}H_{186}N_4O_{34} [M+Na]^+$ : 2838.2846; found: 2838.2864. According to general procedure for ester and carbamate deprotection, deprotected compound was prepared from **28** (22.0 mg, 7.81  $\mu$ mol) with NaOMe in a methanolic solution (0.10 mL, 1.0 M, 0.10 mmol) in a mixture of MeOH/DCM (3 mL). According to general procedure for hydrogenolysis, compound **1** was prepared from the crude product of previous step with Pd(OH)<sub>2</sub>/C (50 mg, 20 wt.%, Degussa type) in a mixture of <sup>t</sup>BuOH/AcOH/H<sub>2</sub>O (4 mL). Compound **1** (6.5 mg, 69% over 2 steps) was obtained as an amorphous white solid. <sup>1</sup>H NMR (500 MHz, D<sub>2</sub>O):  $\delta$  5.63 (d, 1H,  $J = 3.5$  Hz, H-1<sup>VI</sup>), 5.52 (d, 1H,  $J = 3.5$  Hz, H-1<sup>V</sup>), 5.30 (d, 1H,  $J = 3.5$  Hz, H-1<sup>III</sup>), 4.94 (s, 1H, H-1<sup>II</sup>), 4.58-4.53 (m, 3H, H-1<sup>I</sup>, H-2<sup>II</sup> and H-1<sup>IV</sup>), 4.16-3.72 (m, 34H), 3.71-3.53 (m, 3H), 3.06-3.00 (m, 2H), 2.11 (s, 3H), 2.06 (s, 6H), 1.78-1.53 (m, 4H), 1.48-1.35 (m, 2H); <sup>13</sup>C NMR (HSQC, 150 MHz, D<sub>2</sub>O):  $\delta$  102.62 (C-1<sup>IV</sup>), 101.00 (C-1<sup>I</sup>), 99.29 (C-1<sup>V</sup>), 98.63 (C-1<sup>II</sup>), 98.46 (C-1<sup>III</sup>), 97.74 (C-1<sup>VI</sup>), 76.93, 75.97, 75.73, 75.46, 75.43, 75.25, 74.75, 73.48, 72.78, 72.77, 72.19, 71.33, 71.17, 71.11, 70.37, 69.98, 69.57, 69.47, 69.17, 69.02, 68.89, 68.82, 65.33, 61.18, 60.86, 60.47, 60.18, 59.60, 58.96, 54.79, 53.89, 53.04, 49.08, 39.54, 28.24, 26.57, 22.46, 22.33, 22.31. HR MALDI-TOF MS:  $m/z$ : calcd for  $C_{47}H_{82}N_4O_{31} [M+Na]^+$ : 1221.4861; found: 1221.4888.

**Scheme S2. Synthesis of trisaccharide 2**

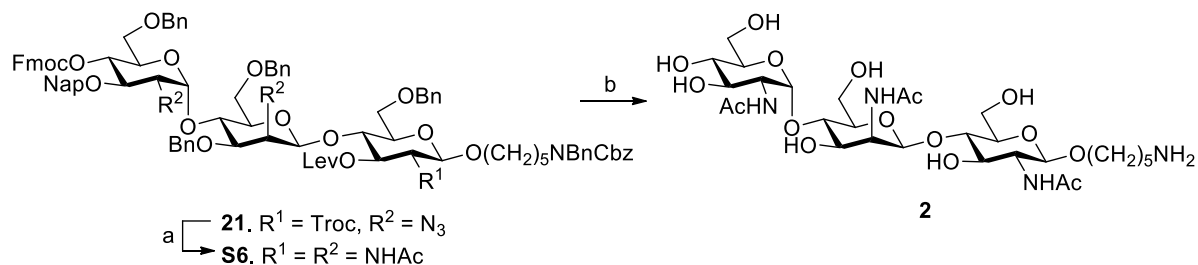

<sup>a</sup>Reagents and conditions: (a) Zn, AcOH/Ac<sub>2</sub>O/THF, CuSO<sub>4(aq)</sub> (64%); (b) NaOMe, MeOH/DCM followed by Pd(OH)<sub>2</sub>/C, H<sub>2</sub>, <sup>t</sup>BuOH/AcOH/H<sub>2</sub>O (72%, 2 steps).

**5-Aminopentyl O-(2-acetamido-2-deoxy- $\alpha$ -D-glucopyranosyl)-(1 $\rightarrow$ 4)-O-(2-acetamido-2-deoxy- $\beta$ -D-mannopyranosyl)-(1 $\rightarrow$ 4)-2-acetamido-2-deoxy- $\beta$ -D-glucopyranoside (2).**

According to general procedure for reduction of azido and Troc groups, compound **S6** was prepared from **21** (33.4 mg, 0.0180 mmol) with zinc metal powder (59 mg, 0.91 mmol) in AcOH/Ac<sub>2</sub>O/THF (6 mL) and saturated CuSO<sub>4(aq)</sub> (0.2 mL). The resulting yellow oil was purified by flash chromatography over silica gel (MeOH/DCM, 1/30, v/v) to give **S6** (20.2 mg, 64%) as an amorphous white solid:  $R_f = 0.31$  (MeOH/DCM, 1/15, v/v). HR MALDI-TOF MS:  $m/z$ : calcd for C<sub>103</sub>H<sub>112</sub>N<sub>4</sub>O<sub>22</sub> [M+Na]<sup>+</sup>: 1779.7666; found: 1779.7689. According to general procedure for ester and carbamate deprotection, deprotected compound was prepared from **S6** (20.2 mg, 0.0115 mmol) with NaOMe in a methanolic solution (0.12 mL, 1.0 M, 0.12 mmol) in a mixture of MeOH/DCM (4.5 mL). According to general procedure for hydrogenolysis, compound **2** was prepared from the crude product of previous step with Pd(OH)<sub>2</sub>/C (50 mg, 20 wt.%, Degussa type) in a mixture of <sup>t</sup>BuOH/AcOH/H<sub>2</sub>O (4 mL). Compound **2** (5.9 mg, 72% over 2 steps) was obtained as an amorphous white solid. <sup>1</sup>H NMR (500 MHz, D<sub>2</sub>O):  $\delta$  5.34 (d, 1H,  $J = 3.5$  Hz, H-1<sup>III</sup>), 4.95 (s, 1H, H-1<sup>II</sup>), 4.58-4.54 (m, 2H, H-1<sup>I</sup> and H-2<sup>II</sup>), 4.12 (dd, 1H,  $J = 4.5$  Hz and 9.5 Hz, H-3<sup>II</sup>), 3.98-3.88 (m, 6H, H-6a<sup>I</sup>, H-6e<sup>I</sup>, H-6a<sup>II</sup>, H-6e<sup>II</sup>, H-2<sup>III</sup> and CHH-Linker), 3.86-



3.73 (m, 8H, H-2<sup>I</sup>, H-3<sup>I</sup>, H-4<sup>I</sup>, H-4<sup>II</sup>, H-3<sup>III</sup>, H-4<sup>III</sup>, H-6a<sup>III</sup> and H-6e<sup>III</sup>), 3.69-3.62 (m, 2H, H-5<sup>I</sup> and CHH-Linker), 3.57-3.53 (m, 2H, H-5<sup>II</sup> and H-5<sup>III</sup>), 3.04 (t, 2H, *J* = 7.5 Hz, CH<sub>2</sub>-Linker), 2.12 (s, 3H), 2.08 (s, 6H), 1.75-1.69 (m, 2H, CH<sub>2</sub>-Linker), 1.67-1.62 (m, 2H, CH<sub>2</sub>-Linker), 1.48-1.43 (m, 2H, CH<sub>2</sub>-Linker); <sup>13</sup>C NMR (HSQC, 125 MHz, D<sub>2</sub>O): δ 101.35 (C-1<sup>I</sup>), 99.41 (C-1<sup>II</sup>), 98.32 (C-1<sup>III</sup>), 79.12 (C-4<sup>I</sup>), 75.35 (C-5<sup>I</sup>), 74.66 (C-5<sup>II</sup>), 73.17 (C-3<sup>I</sup> and C-4<sup>III</sup>), 72.96 (C-3<sup>II</sup>), 72.53 (C-3<sup>III</sup>), 70.89 (C-4<sup>II</sup>), 70.36, 69.99 (C-5<sup>III</sup>), 60.78 (C-6<sup>II</sup>), 60.66 (C-6<sup>I</sup>), 60.37 (C-6<sup>III</sup>), 55.43 (C-2<sup>I</sup>), 53.93 (C-2<sup>II</sup>), 53.90 (C-2<sup>III</sup>), 28.22, 26.58, 22.33, 22.22, 22.15. HR MALDI-TOF MS: *m/z*: calcd for C<sub>29</sub>H<sub>52</sub>N<sub>4</sub>O<sub>16</sub> [M+Na]<sup>+</sup>: 735.3276; found: 735.3304.

**<sup>a</sup>Scheme S3.** Synthesis of tetrasaccharide **3**

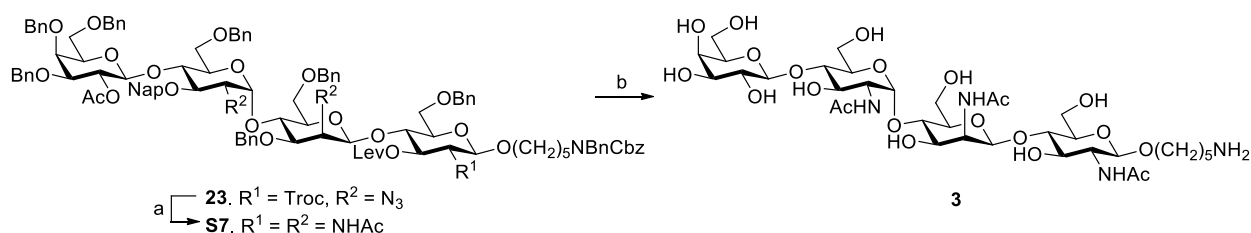

<sup>a</sup>Reagents and conditions: (a) Zn, AcOH/Ac<sub>2</sub>O/THF, CuSO<sub>4(aq)</sub> (66%); (b) NaOMe, MeOH/DCM followed by Pd(OH)<sub>2</sub>/C, H<sub>2</sub>, <sup>t</sup>BuOH/AcOH/H<sub>2</sub>O (75%, 2 steps).

**5-Aminopentyl** ***O*-(β-D-galactopyranosyl)-(1→4)-*O*-(2-acetamido-2-deoxy-α-D-glucopyranosyl)-(1→4)-*O*-(2-acetamido-2-deoxy-β-D-mannopyranosyl)-(1→4)-2-**

**acetamido-2-deoxy-β-D-glucopyranoside (3).** According to general procedure for reduction of azido and Troc groups, compound **S7** was prepared from **23** (32.6 mg, 0.0154 mmol) with zinc metal powder (50 mg, 0.77 mmol) in AcOH/Ac<sub>2</sub>O/THF (5 mL) and saturated CuSO<sub>4(aq)</sub> (0.2 mL). The resulting yellow oil was purified by flash chromatography over silica gel (MeOH/DCM, 1/30, v/v) to give **S7** (20.4 mg, 66%) as an amorphous white solid: *R<sub>f</sub>* = 0.30 (MeOH/DCM, 1/15, v/v). HR MALDI-TOF MS: *m/z*: calcd for C<sub>117</sub>H<sub>132</sub>N<sub>4</sub>O<sub>26</sub> [M+Na]<sup>+</sup>: 2031.9028; found:

2031.9056. According to general procedure for ester and carbamate deprotection, deprotected compound was prepared from **S7** (20.4 mg, 0.0102 mmol) with NaOMe in a methanolic solution (0.11 mL, 1.0 M, 0.11 mmol) in a mixture of MeOH/DCM (4 mL). According to general procedure for hydrogenolysis, compound **3** was prepared from the crude product of previous step with Pd(OH)<sub>2</sub>/C (50 mg, 20 wt.%, Degussa type) in a mixture of <sup>t</sup>BuOH/AcOH/H<sub>2</sub>O (3 mL). Compound **3** (6.7 mg, 75% over 2 steps) was obtained as an amorphous white solid. <sup>1</sup>H NMR (500 MHz, D<sub>2</sub>O): δ 5.32 (d, 1H, *J* = 4 Hz, H-1<sup>III</sup>), 4.92 (s, 1H, H-1<sup>II</sup>), 4.54-4.50 (m, 3H, H-1<sup>I</sup>, H-2<sup>II</sup> and H-1<sup>IV</sup>), 4.09 (dd, 1H, *J* = 4.5 Hz and 9.5 Hz), 3.99-3.85 (m, 9H), 3.84-3.68 (m, 10H), 3.64-3.52 (m, 5H), 3.01 (t, 2H, *J* = 7.5 Hz), 2.09 (s, 3H), 2.05 (s, 3H), 2.02 (s, 3H), 1.72-1.66 (m, 2H), 1.65-1.58 (m, 2H), 1.44-1.40 (m, 2H); <sup>13</sup>C NMR (HSQC, 125 MHz, D<sub>2</sub>O): δ 103.03 (C-1<sup>IV</sup>), 101.32 (C-1<sup>I</sup>), 99.48 (C-1<sup>II</sup>), 97.90 (C-1<sup>III</sup>), 79.07, 78.69, 78.63, 75.54, 75.21, 74.60, 73.24, 72.90, 72.72, 72.52, 71.65, 71.16, 70.30, 69.45, 68.74, 61.17, 60.73, 60.47, 59.96, 55.41, 53.88, 53.51, 39.48, 28.23, 25.72, 22.32, 22.23, 22.42. HR MALDI-TOF MS: *m/z*: calcd for C<sub>35</sub>H<sub>62</sub>N<sub>4</sub>O<sub>21</sub> [M+Na]<sup>+</sup>: 897.3804; found: 897.3835.

**Scheme S4.** Synthesis of tetrasaccharide **4**

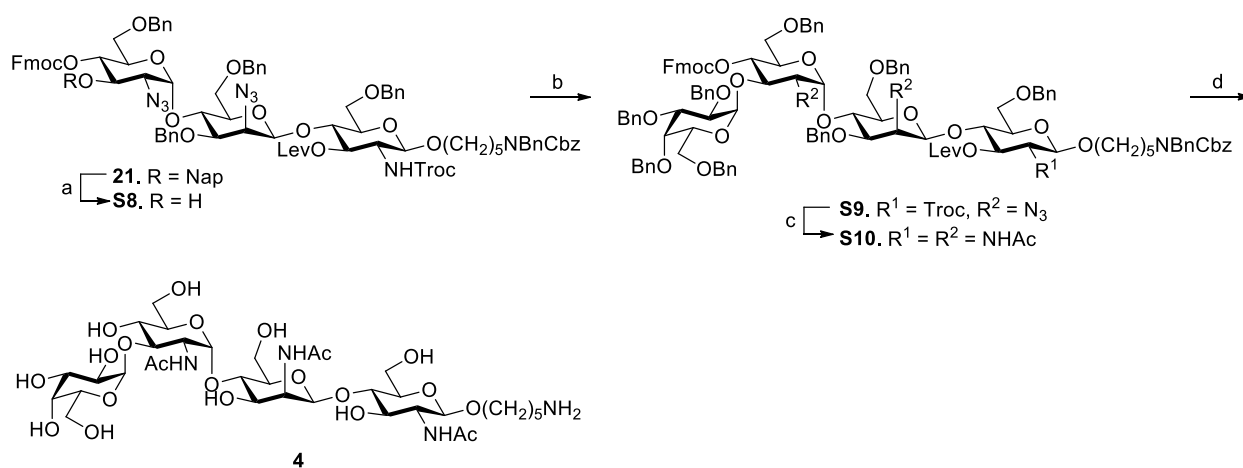

<sup>a</sup>Reagents and conditions: (a) DDQ, DCM/H<sub>2</sub>O (92%); (b) **14**, TMSOTf, Et<sub>2</sub>O/DCM, -55 °C to 0 °C (82%); (c) Zn, AcOH/Ac<sub>2</sub>O/THF, CuSO<sub>4(aq)</sub> (67%); (d) NaOMe, MeOH/DCM followed by Pd(OH)<sub>2</sub>/C, H<sub>2</sub>, <sup>t</sup>BuOH/AcOH/H<sub>2</sub>O (73%, 2 steps).

***N*-Benzyl-*N*-benzyloxycarbonyl-5-aminopentyl *O*-[2-azido-6-*O*-benzyl-2-deoxy-4-*O*-(9-fluorenylmethyloxycarbonyl)- $\alpha$ -D-glucopyranosyl]-(1 $\rightarrow$ 4)-*O*-(2-azido-3,6-di-*O*-benzyl-2-deoxy- $\beta$ -D-mannopyranosyl)-(1 $\rightarrow$ 4)-6-*O*-benzyl-2-deoxy-3-*O*-levulinoyl-2-(2,2,2-trichloroethoxy)carbonylamino- $\beta$ -D-glucopyranoside (S8).** According to general procedure for deprotection of Nap ether, compound **S8** was prepared from **21** (74.5 mg, 0.0401 mmol) with DDQ (27 mg, 0.12 mmol) in a mixture of DCM/water (3 mL). The resulting yellow oil was purified by flash chromatography over silica gel (EtOAc/hexanes, 1/2, v/v) to give **S8** (63.4 mg, 92%) as an amorphous white solid:  $R_f = 0.24$  (EtOAc/hexanes, 1/2, v/v).  $^1\text{H}$  NMR (500 MHz,  $\text{CDCl}_3$ ):  $\delta$  7.79-7.16 (m, 38H), 5.67 (d, 1H,  $J = 3.5$  Hz, H-1<sup>III</sup>), 5.40-4.92 (m, 4H, H-3<sup>I</sup>, *NHTroc* and  $\text{NC}[\text{=O}]\text{CH}_2\text{Ph}$ ), 4.81 (t, 1H,  $J = 9.5$  Hz, H-4<sup>III</sup>), 4.78-4.30 (m, 14H, H-1<sup>I</sup>, H-1<sup>II</sup>,  $\text{NCH}_2\text{Ph}$ ,  $\text{OCH}_2\text{CCl}_3$  and four  $\text{OCH}_2\text{Ph}$ ), 4.21-4.19 (m, 3H,  $\text{CH}_2\text{CHFmoc}$  and  $\text{CH}_2\text{CHFmoc}$ ), 4.05-3.99 (m, 3H, H-4<sup>I</sup>, H-4<sup>II</sup> and H-3<sup>III</sup>), 3.84-3.58 (m, 9H, H-2<sup>I</sup>, H-5<sup>I</sup>, H-6a<sup>I</sup>, H-6e<sup>I</sup>, H-2<sup>II</sup>, H-3<sup>II</sup>, H-6a<sup>II</sup> and H-6e<sup>II</sup> and H-5<sup>III</sup>), 3.42-3.17 (m, 8H, H-5<sup>II</sup>, H-2<sup>III</sup>, H-6a<sup>III</sup> and H-6e<sup>III</sup> and two  $\text{CH}_2\text{-Linker}$ ), 2.62-2.39 (m, 4H), 2.02 (s, 3H), 1.71-1.40 (m, 4H, two  $\text{CH}_2\text{-Linker}$ ), 1.32-1.18 (m, 2H,  $\text{CH}_2\text{-Linker}$ );  $^{13}\text{C}$  NMR (75 MHz,  $\text{CDCl}_3$ ):  $\delta$  206.75, 172.91, 156.92, 156.50, 155.32, 154.43, 143.34, 143.27, 141.54, 141.51, 138.23, 138.07, 138.01, 137.86, 137.13, 128.73, 128.76, 128.74, 128.62, 128.43, 128.33, 128.29, 128.17, 128.13, 128.04, 127.85, 127.78, 127.50, 127.39, 125.23, 125.18, 120.32, 101.34 (C-1<sup>I</sup>), 98.20 (C-1<sup>II</sup>), 97.63 (C-1<sup>III</sup>), 95.85, 82.30 (C-3<sup>II</sup>), 75.61 (C-4<sup>III</sup>), 74.84 (C-4<sup>I</sup> and C-5<sup>II</sup>), 74.69 (C-5<sup>I</sup>), 74.49, 73.88, 73.66, 73.20, 71.73 (C-3<sup>I</sup>), 71.55, 70.64 (C-4<sup>II</sup> and C-3<sup>III</sup>), 70.48, 70.39, 69.71 (C-5<sup>III</sup>), 69.54 (C-6<sup>I</sup> and <sup>II</sup>), 69.27, 68.89 (C-6<sup>III</sup>), 67.98, 67.38, 63.43 (C-2<sup>III</sup>), 60.83 (C-2<sup>II</sup>), 56.61 (C-2<sup>I</sup>), 50.72, 50.51, 47.33, 46.91, 46.34, 37.92, 29.89, 29.81, 29.55, 29.31,

27.93, 27.40, 23.23. HR MALDI-TOF MS: m/z: calcd for C<sub>89</sub>H<sub>95</sub>Cl<sub>3</sub>N<sub>8</sub>O<sub>21</sub> [M+Na]<sup>+</sup>: 1739.5575; found: 1739.5600.

***N*-Benzyl-*N*-benzyloxycarbonyl-5-aminopentyl *O*-(2,3,4,6-tetra-*O*-benzyl- $\alpha$ -D-galactopyranosyl)-(1 $\rightarrow$ 3)-*O*-[2-azido-6-*O*-benzyl-2-deoxy-4-*O*-(9-fluorenylmethyloxycarbonyl)- $\alpha$ -D-glucopyranosyl]-(1 $\rightarrow$ 4)-*O*-(2-azido-3,6-di-*O*-benzyl-2-deoxy- $\beta$ -D-mannopyranosyl)-(1 $\rightarrow$ 4)-6-*O*-benzyl-2-deoxy-3-*O*-levulinoyl-2-(2,2,2-trichloroethoxy)carbonylamino- $\beta$ -D-glucopyranoside (**S9**).** According to general procedure of TMSOTf-mediated glycosylation for synthesis of  $\alpha$ -anomers, compound **S9** was prepared from a mixture of the acceptor **S8** (68.2 mg, 0.0397 mmol) and trichloroacetimidate **14** (67.9 mg, 0.0994 mmol), 4 Å molecular sieves (200 mg) in a mixture of Et<sub>2</sub>O/DCM (3 mL) with catalytic TMSOTf (3.6  $\mu$ L, 0.0199 mmol). The reaction time was 1.5 h. The resulting yellow oil was purified by flash chromatography over silica gel (EtOAc/hexanes, 1/2, v/v) to give **S9** (72.9 mg, 82%) as an amorphous white solid:  $R_f$  = 0.29 (EtOAc/hexanes, 1/2, v/v). <sup>1</sup>H NMR (500 MHz, CDCl<sub>3</sub>):  $\delta$  7.73-7.11 (m, 58H), 5.76 (d, 1H,  $J$  = 4 Hz, H-1<sup>III</sup>), 5.37-5.14 (m, 5H, H-3<sup>I</sup>, H-1<sup>IV</sup>, NHTroc and NC[=O]CH<sub>2</sub>Ph), 4.99 (t, 1H,  $J$  = 9.3 Hz, H-4<sup>III</sup>), 4.91 (d, 1H,  $J$  = 11 Hz, OCHHNap), 4.74-4.29 (m, 23H, H-1<sup>I</sup>, H-1<sup>II</sup>, OCHHNap, NCH<sub>2</sub>Ph, OCH<sub>2</sub>CCl<sub>3</sub> and eight OCH<sub>2</sub>Ph), 4.26-4.87 (m, 11H, H-4<sup>I</sup>, H-4<sup>II</sup>, H-3<sup>III</sup>, H-5<sup>III</sup>, H-2<sup>IV</sup>, H-3<sup>IV</sup>, H-4<sup>IV</sup>, H-5<sup>IV</sup>, CH<sub>2</sub>CHFmoc and CH<sub>2</sub>CHFmoc), 3.82-3.56 (m, 10H, H-2<sup>I</sup>, H-5<sup>I</sup>, H-6a<sup>I</sup>, H-6e<sup>I</sup>, H-2<sup>II</sup>, H-3<sup>II</sup>, H-6a<sup>II</sup>, H-6e<sup>II</sup>, H-6a<sup>IV</sup> and H-6e<sup>IV</sup>), 3.42-3.16 (m, 8H, H-5<sup>II</sup>, H-2<sup>III</sup>, H-6a<sup>III</sup> and H-6e<sup>III</sup> and two CH<sub>2</sub>-Linker), 2.57-2.33 (m, 4H), 1.99 (s, 3H), 1.68-1.42 (m, 4H, two CH<sub>2</sub>-Linker), 1.36-1.18 (m, 2H, CH<sub>2</sub>-Linker); <sup>13</sup>C NMR (150 MHz, CDCl<sub>3</sub>):  $\delta$  206.76, 172.91, 156.92, 156.45, 154.48, 154.10, 143.59, 143.13, 141.44, 141.35, 139.01, 138.87, 138.61, 138.32, 138.07, 137.95, 137.11, 136.97, 128.79, 128.78, 128.74, 128.61, 128.56, 128.44, 128.35, 128.34, 128.31, 128.29, 128.24, 128.15, 128.04, 127.90,

127.86, 127.74, 127.66, 127.64, 127.51, 127.47, 127.40, 127.38, 127.30, 127.24, 125.42, 125.13, 120.17, 101.30 (C-1<sup>I</sup>), 99.37 (C-1<sup>IV</sup>), 98.19 (C-1<sup>II and III</sup>), 95.85, 82.23, 78.90, 76.24, 76.01, 75.11, 75.08, 74.81, 74.72, 74.66, 74.48, 73.89, 73.62, 73.59, 73.16, 73.11, 73.01, 71.76, 71.69, 71.50, 70.82, 70.29, 70.03, 69.62, 69.18, 69.04, 68.87, 68.79, 67.37, 62.30, 60.81, 56.59, 50.72, 50.47, 47.33, 46.53, 46.34, 37.87, 32.16, 29.89, 29.78, 29.29, 29.00, 27.90, 27.39, 23.23. HR MALDI-TOF MS: m/z: calcd for C<sub>123</sub>H<sub>129</sub>Cl<sub>3</sub>N<sub>8</sub>O<sub>26</sub> [M+Na]<sup>+</sup>: 2261.7981; found: 2261.7993.

**5-Aminopentyl** ***O*-( $\alpha$ -D-galactopyranosyl)-(1 $\rightarrow$ 3)-*O*-(2-acetamido-2-deoxy- $\alpha$ -D-glucopyranosyl)-(1 $\rightarrow$ 4)-*O*-(2-acetamido-2-deoxy- $\beta$ -D-mannopyranosyl)-(1 $\rightarrow$ 4)-2-acetamido-2-deoxy- $\beta$ -D-glucopyranoside (4).** According to general procedure for reduction of azido and Troc groups, compound **S10** was prepared from **S9** (36.7 mg, 0.0164 mmol) with zinc metal powder (53 mg, 0.82 mmol) in AcOH/Ac<sub>2</sub>O/THF (5.5 mL) and saturated CuSO<sub>4(aq)</sub> (0.2 mL). The resulting yellow oil was purified by flash chromatography over silica gel (MeOH/DCM, 1/30, v/v) to give **S10** (23.5 mg, 67%) as an amorphous white solid: *R<sub>f</sub>* = 0.33 (MeOH/DCM, 1/15, v/v). HR MALDI-TOF MS: m/z: calcd for C<sub>126</sub>H<sub>138</sub>N<sub>4</sub>O<sub>27</sub> [M+Na]<sup>+</sup>: 2161.9446; found: 2161.9469. According to general procedure for ester and carbamate deprotection, deprotected compound was prepared from **S10** (23.5 mg, 0.0110 mmol) with NaOMe in a methanolic solution (0.11 mL, 1.0 M, 0.11 mmol) in a mixture of MeOH/DCM (4.5 mL). According to general procedure for hydrogenolysis, compound **4** was prepared from the crude product of previous step with Pd(OH)<sub>2</sub>/C (50 mg, 20 wt.%, Degussa type) in a mixture of <sup>t</sup>BuOH/AcOH/H<sub>2</sub>O (5 mL). Compound **4** (7.0 mg, 73% over 2 steps) was obtained as an amorphous white solid. <sup>1</sup>H NMR (500 MHz, D<sub>2</sub>O):  $\delta$  5.43 (d, 1H, *J* = 4 Hz, H-1<sup>IV</sup>) 5.28 (d, 1H, *J* = 4 Hz, H-1<sup>III</sup>), 4.93 (s, 1H, H-1<sup>II</sup>), 4.56-4.50 (m, 2H, H-1<sup>I</sup>, H-2<sup>II</sup>), 4.11 (dd, 1H, *J* = 4.5 Hz and 9.5 Hz), 4.08-3.86 (m, 9H), 3.84-3.68 (m, 12H), 3.66-3.58 (m, 2H), 3.54-3.48 (m, 1H), 3.00 (t,

2H,  $J = 7.5$  Hz), 2.08 (s, 3H), 2.05 (s, 6H), 1.71-1.65 (m, 2H), 1.62-1.58 (m, 2H), 1.44-1.36 (m, 2H);  $^{13}\text{C}$  NMR (HSQC, 125 MHz,  $\text{D}_2\text{O}$ ):  $\delta$  101.33 (C-1<sup>I</sup>), 99.43 (C-1<sup>IV</sup>), 99.40 (C-1<sup>II</sup>), 98.76 (C-1<sup>III</sup>), 79.05, 77.10, 76.42, 76.26, 75.19, 74.59, 73.74, 73.59, 72.89, 72.86, 72.51, 71.18, 70.63, 70.30, 69.46, 69.29, 68.70, 60.92, 60.70, 60.39, 60.32, 55.39, 53.88, 52.40, 39.46, 28.23, 26.58, 22.28, 22.26, 22.10. HR MALDI-TOF MS:  $m/z$ : calcd for  $\text{C}_{35}\text{H}_{62}\text{N}_4\text{O}_{21}$   $[\text{M}+\text{Na}]^+$ : 897.3804; found: 897.3842.

**Scheme 5.** Synthesis of tetrasaccharide **5**

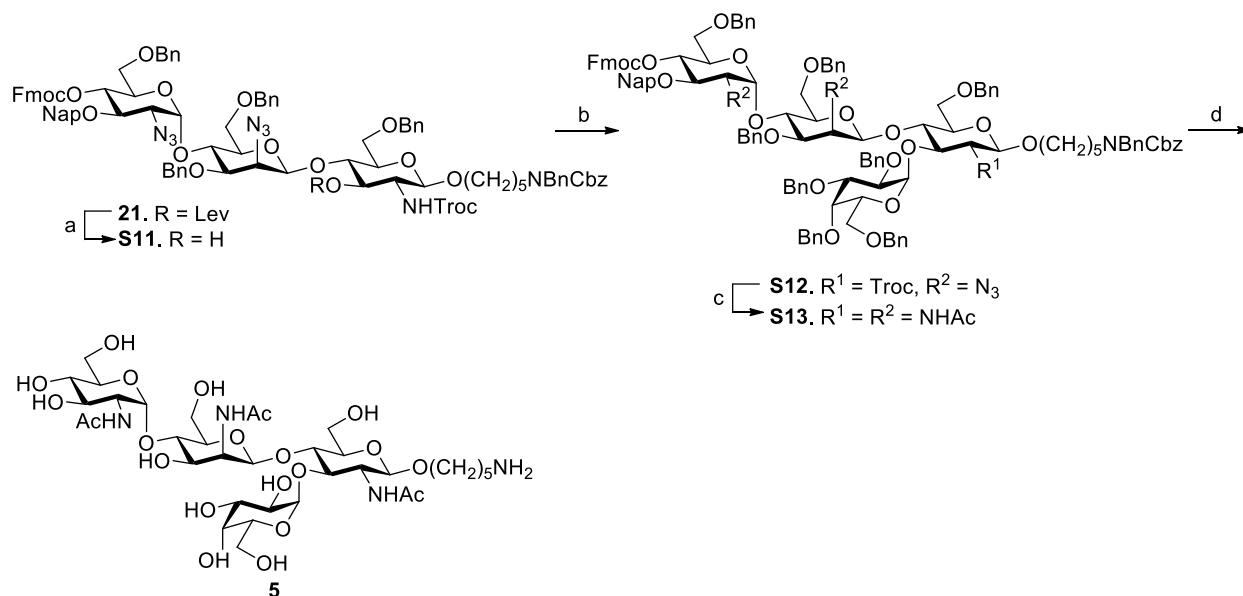

<sup>a</sup>Reagents and conditions: (a)  $\text{H}_2\text{NNH}_2$ , HOAc, DCM/MeOH; (94%); (b) **14**, TMSOTf,  $\text{Et}_2\text{O}/\text{DCM}$ ,  $-55$  °C to  $0$  °C (66%,  $\alpha/\beta > 20/1$ ); (c) Zn, AcOH/Ac<sub>2</sub>O/THF,  $\text{CuSO}_{4(\text{aq})}$  (62%); (d) NaOMe, MeOH/DCM followed by  $\text{Pd}(\text{OH})_2/\text{C}$ ,  $\text{H}_2$ ,  $t\text{BuOH}/\text{AcOH}/\text{H}_2\text{O}$  (78%, 2 steps).

*N*-Benzyl-*N*-benzyloxycarbonyl-5-aminopentyl *O*-[2-azido-6-*O*-benzyl-2-deoxy-4-*O*-(9-fluorenylmethyloxycarbonyl)-3-*O*-(2-methylnaphthyl)- $\alpha$ -D-glucopyranosyl]-(1 $\rightarrow$ 4)-*O*-(2-azido-3,6-di-*O*-benzyl-2-deoxy- $\beta$ -D-mannopyranosyl)-(1 $\rightarrow$ 4)-6-*O*-benzyl-2-deoxy-2-(2,2,2-trichloroethoxy)carbonylamino- $\beta$ -D-glucopyranoside (**S11**). According to general procedure

for deprotection of Lev esters, compound **S11** was prepared from **21** (72.3 mg, 0.0389 mmol) with hydrazine acetate (7.2 mg, 0.078 mmol) in a mixture of MeOH/DCM (3 mL). The resulting yellow oil was purified by flash chromatography over silica gel (EtOAc/hexanes, 2/5, v/v) to give **S11** (64.4 mg, 94%) as an amorphous white solid:  $R_f = 0.37$  (EtOAc/hexanes, 1/2, v/v).  $^1\text{H}$  NMR (500 MHz,  $\text{CDCl}_3$ ):  $\delta$  7.76-7.16 (m, 45H), 5.60 (d, 1H,  $J = 4$  Hz, H-1<sup>III</sup>), 5.42-5.16 (m, 3H, NHTroc and  $\text{NC}[\text{=O}]\text{CH}_2\text{Ph}$ ), 4.95-4.77 (m, 3H, H-4<sup>III</sup> and  $\text{OCH}_2\text{Nap}$ ), 4.72-4.21 (m, 16H, H-1<sup>I</sup>, H-1<sup>II</sup>,  $\text{CH}_2\text{CHFmoc}$ ,  $\text{OCH}_2\text{CCl}_3$ ,  $\text{NCH}_2\text{Ph}$  and four  $\text{OCH}_2\text{Ph}$ ), 4.01 (t, 1H,  $J = 6.8$  Hz,  $\text{CH}_2\text{CHFmoc}$ ), 3.94-3.56 (m, 11H, H-3<sup>I</sup>, H-4<sup>I</sup>, H-6a<sup>I</sup>, H-6e<sup>I</sup>, H-2<sup>II</sup>, H-3<sup>II</sup>, H-4<sup>II</sup>, H-6a<sup>II</sup>, H-6e<sup>II</sup>, H-3<sup>III</sup> and H-5<sup>III</sup>), 3.52-3.18 (m, 10H, H-2<sup>I</sup>, H-5<sup>I</sup>, H-5<sup>II</sup>, H-2<sup>III</sup>, H-6a<sup>III</sup> and H-6e<sup>III</sup> and two  $\text{CH}_2\text{-Linker}$ ), 1.68-1.44 (m, 4H, two  $\text{CH}_2\text{-Linker}$ ), 1.36-1.21 (m, 2H,  $\text{CH}_2\text{-Linker}$ );  $^{13}\text{C}$  NMR (75 MHz,  $\text{CDCl}_3$ ):  $\delta$  154.33, 143.32, 141.49, 138.30, 138.11, 137.85, 137.54, 136.94, 135.10, 133.39, 133.19, 128.85, 128.74, 128.64, 128.48, 128.43, 128.32, 128.22, 128.20, 128.10, 128.03, 127.91, 127.83, 127.50, 127.33, 126.74, 126.27, 126.13, 125.84, 125.13, 125.04, 120.26, 100.87 (C-1<sup>I</sup>), 100.11 (C-1<sup>II</sup>), 98.07 (C-1<sup>III</sup>), 95.84, 82.19 (C-3<sup>I</sup>), 81.95 (C-3<sup>II</sup>), 77.43 (C-3<sup>III</sup>), 75.22 (C-4<sup>III</sup>), 75.03, 74.63, 74.48 (C-5<sup>I</sup> and C-5<sup>II</sup>), 73.81, 73.77, 73.69, 73.63, 72.35 (C-4<sup>I</sup> and C-4<sup>II</sup>), 71.89, 71.32, 70.08, 69.93, 69.79 (C-6<sup>I</sup> and <sup>II</sup>), 69.44 (C-5<sup>III</sup>), 68.72, 68.36 (C-6<sup>III</sup>), 67.36, 62.74 (C-2<sup>III</sup>), 61.20 (C-2<sup>II</sup>), 58.04 (C-2<sup>I</sup>), 50.49, 47.43, 46.83, 46.34, 29.89, 29.16, 28.04, 27.40, 23.29. HR MALDI-TOF MS:  $m/z$ : calcd for  $\text{C}_{95}\text{H}_{97}\text{Cl}_3\text{N}_8\text{O}_{19}$   $[\text{M}+\text{Na}]^+$ : 1781.5833; found: 1781.5855.

***N*-Benzyl-*N*-benzyloxycarbonyl-5-aminopentyl *O*-[2-azido-6-*O*-benzyl-2-deoxy-4-*O*-(9-fluorenylmethyloxycarbonyl)-3-*O*-(2-methylnaphthyl)- $\alpha$ -D-glucopyranosyl]-(1 $\rightarrow$ 4)-*O*-(2-azido-3,6-di-*O*-benzyl-2-deoxy- $\beta$ -D-mannopyranosyl)-(1 $\rightarrow$ 4)-[*O*-(2,3,4,6-tetra-*O*-benzyl- $\alpha$ -D-galactopyranosyl)-(1 $\rightarrow$ 3)]-6-*O*-benzyl-2-deoxy-2-(2,2,2-trichloroethoxy)carbonylamino- $\beta$ -D-glucopyranoside (**S12**).** According to general procedure of TMSOTf-mediated

glycosylation for synthesis of  $\alpha$ -anomers, compound **S12** was prepared from a mixture of the acceptor **S11** (72.5 mg, 0.0412 mmol) and trichloroacetimidate **14** (70.4 mg, 0.103 mmol), 4 Å molecular sieves (220 mg) in a mixture of Et<sub>2</sub>O/DCM (4 mL) with catalytic TMSOTf (3.8  $\mu$ L, 0.0206 mmol). The reaction time was 1.5 h. The resulting yellow oil, a separable mixture of  $\alpha$ - and  $\beta$ -anomer ( $\alpha/\beta > 20/1$ ), was purified by flash chromatography over silica gel (EtOAc/hexanes, 2/5, v/v) to give **S12** (62.1 mg, 66% of  $\alpha$ -anomer after purification) as an amorphous white solid:  $R_f = 0.31$  (EtOAc/hexanes, 2/5, v/v). <sup>1</sup>H NMR (500 MHz, CDCl<sub>3</sub>):  $\delta$  7.77-7.14 (m, 45H), 6.30 (br s, 1H, *NHTroc*), 5.65 (d, 1H,  $J = 3.5$  Hz, H-1<sup>III</sup>), 5.25 (br s, 1H, H-1<sup>IV</sup>), 5.19 (d, 2H,  $J = 13$  Hz, NC[=O]CH<sub>2</sub>Ph), 5.01 (t, 1H,  $J = 9.8$  Hz, H-4<sup>III</sup>), 4.92-4.38 (m, 23H, H-1<sup>II</sup>, OCH<sub>2</sub>Nap, OCH<sub>2</sub>CCl<sub>3</sub>, NCH<sub>2</sub>Ph and eight OCH<sub>2</sub>Ph), 4.33 (d, 1H,  $J = 6.5$  Hz, H-1<sup>I</sup>), 4.28-4.17 (m, 3H, H-3<sup>I</sup> and CH<sub>2</sub>CHFmoc), 4.08-3.92 (m, 7H, H-4<sup>I</sup>, H-2<sup>II</sup>, H-4<sup>II</sup>, H-2<sup>IV</sup>, H-4<sup>IV</sup>, H-5<sup>IV</sup> and CH<sub>2</sub>CHFmoc), 3.91-3.56 (m, 11H, H-2<sup>I</sup>, H-5<sup>I</sup>, H-6a<sup>I</sup>, H-6e<sup>I</sup>, H-6a<sup>II</sup>, H-6e<sup>II</sup>, H-3<sup>III</sup>, H-5<sup>III</sup>, H-3<sup>IV</sup>, H-6a<sup>IV</sup> and H-6e<sup>IV</sup>), 3.48 (br s, 1H, H-3<sup>II</sup>), 3.40-3.17 (m, 8H, H-5<sup>II</sup>, H-2<sup>III</sup>, H-6a<sup>III</sup> and H-6e<sup>III</sup> and two CH<sub>2</sub>-Linkers), 1.56-1.40 (m, 4H, two CH<sub>2</sub>-Linkers), 1.36-1.17 (m, 2H, CH<sub>2</sub>-Linkers); <sup>13</sup>C NMR (150 MHz, CDCl<sub>3</sub>):  $\delta$  156.86, 156.31, 154.29, 154.21, 143.38, 143.36, 141.45, 139.03, 138.70, 138.49, 138.17, 137.93, 136.91, 135.20, 133.38, 133.16, 128.75, 128.72, 128.58, 128.57, 128.56, 128.49, 128.47, 128.43, 128.39, 128.33, 128.31, 128.25, 128.18, 128.10, 128.04, 128.01, 127.99, 127.93, 127.91, 127.80, 127.79, 127.72, 127.64, 127.45, 127.35, 127.30, 126.67, 126.21, 126.06, 125.82, 125.15, 125.08, 120.21, 120.20, 101.05 (C-1<sup>I</sup>), 98.45 (C-1<sup>IV</sup>), 97.90 (C-1<sup>III</sup>), 97.76 (C-1<sup>II</sup>), 96.13, 82.78, 79.24, 77.88, 76.14, 75.95, 75.30, 75.18, 74.92, 74.81, 74.64, 74.42, 73.79, 73.75, 73.68, 73.08, 72.73, 71.80, 71.09, 70.06, 69.96, 69.83, 69.57, 68.26, 67.32, 62.90, 60.48, 55.38, 50.70, 50.40, 47.37, 46.82, 46.38, 29.87, 29.40, 28.11, 27.64, 23.38. HR MALDI-TOF MS: m/z: calcd for C<sub>129</sub>H<sub>131</sub>Cl<sub>3</sub>N<sub>8</sub>O<sub>24</sub> [M+Na]<sup>+</sup>: 2303.8239; found: 2303.8261.



**5-Aminopentyl O-(2-acetamido-2-deoxy- $\alpha$ -D-glucopyranosyl)-(1 $\rightarrow$ 4)-O-(2-acetamido-2-deoxy- $\beta$ -D-mannopyranosyl)-(1 $\rightarrow$ 4)-[O-( $\alpha$ -D-galactopyranosyl)-(1 $\rightarrow$ 3)]-2-acetamido-2-deoxy- $\beta$ -D-glucopyranoside (5).** According to general procedure for reduction of azido and Troc groups, compound **S13** was prepared from **S12** (35.5 mg, 0.0156 mmol) with zinc metal powder (51 mg, 0.78 mmol) in AcOH/Ac<sub>2</sub>O/THF (5 mL) and saturated CuSO<sub>4(aq)</sub> (0.2 mL). The resulting yellow oil was purified by flash chromatography over silica gel (MeOH/DCM, 1/30, v/v) to give **S13** (21.0 mg, 62%) as an amorphous white solid:  $R_f$  = 0.33 (MeOH/DCM, 1/15, v/v). HR MALDI-TOF MS: m/z: calcd for C<sub>132</sub>H<sub>140</sub>N<sub>4</sub>O<sub>25</sub> [M+Na]<sup>+</sup>: 2203.9704; found: 2203.9753. According to general procedure for ester and carbamate deprotection, deprotected compound was prepared from **S13** (21.0 mg, 9.63  $\mu$ mol) with NaOMe in a methanolic solution (0.10 mL, 1.0 M, 0.10 mmol) in a mixture of MeOH/DCM (4 mL). According to general procedure for hydrogenolysis, compound **5** was prepared from the crude product of previous step with Pd(OH)<sub>2</sub>/C (50 mg, 20 wt.%, Degussa type) in a mixture of <sup>t</sup>BuOH/AcOH/H<sub>2</sub>O (4 mL). Compound **5** (6.6 mg, 78% over 2 steps) was obtained as an amorphous white solid. <sup>1</sup>H NMR (500 MHz, D<sub>2</sub>O):  $\delta$  5.62 (d, 1H,  $J$  = 4 Hz, H-1<sup>IV</sup>) 5.32 (d, 1H,  $J$  = 4 Hz, H-1<sup>III</sup>), 4.92 (s, 1H, H-1<sup>II</sup>), 4.58-4.52 (m, 2H, H-1<sup>I</sup>, H-2<sup>II</sup>), 4.12-3.99 (m, 3H), 3.97-3.72 (m, 18H), 3.68-3.51 (m, 4H), 3.03 (t, 2H,  $J$  = 7.5 Hz), 2.11 (s, 3H), 2.05-2.04 (two s, 6H), 1.73-1.67 (m, 2H), 1.65-1.60 (m, 2H), 1.45-1.38 (m, 2H); <sup>13</sup>C NMR (HSQC, 125 MHz, D<sub>2</sub>O):  $\delta$  101.14 (C-1<sup>I</sup>), 98.72 (C-1<sup>IV</sup>), 98.38 (C-1<sup>II</sup>), 97.92 (C-1<sup>III</sup>), 78.86, 75.66, 75.13, 73.19, 72.76, 71.30, 70.93, 70.69, 70.37, 70.02, 69.49, 69.24, 68.85, 60.80, 60.72, 60.69, 60.45, 54.90, 53.96, 53.91, 39.52, 28.16, 26.84, 22.41, 22.33, 22.15. HR MALDI-TOF MS: m/z: calcd for C<sub>35</sub>H<sub>62</sub>N<sub>4</sub>O<sub>21</sub> [M+Na]<sup>+</sup>: 897.3804; found: 897.3839.

**Scheme S6. Synthesis of oligosaccharides 6 and 7**

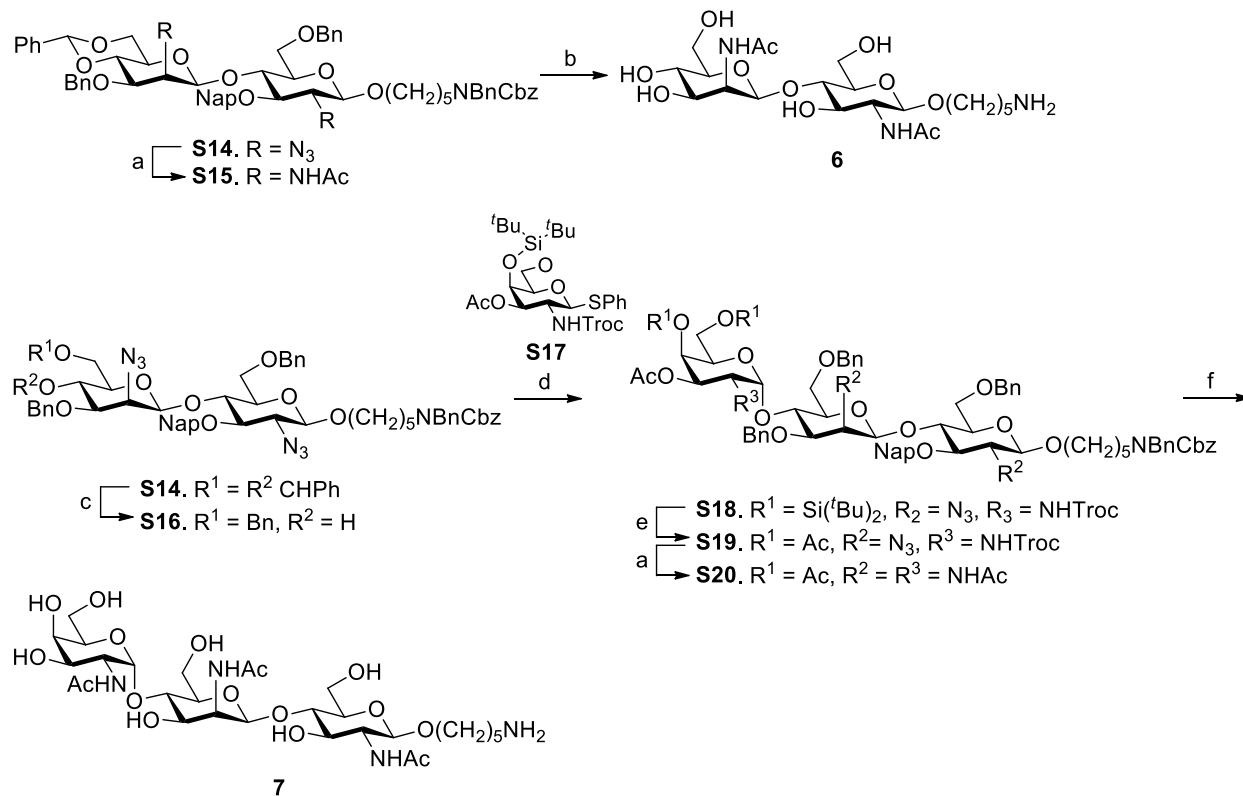

Reagents and conditions: (a) Zn, AcOH/Ac<sub>2</sub>O/THF, CuSO<sub>4(aq)</sub> (82% for **S15**, 69% for **S20**); (b) Pd(OH)<sub>2</sub>/C, H<sub>2</sub>, <sup>t</sup>BuOH/AcOH/H<sub>2</sub>O (76%) (c) Et<sub>3</sub>SiH, TfOH, DCM, 4 Å MS, -78° C to -40° C (74%) (d) NIS, TMSOTf, DCM, 0° C (70%); (e) HF·Py, THF followed by Ac<sub>2</sub>O, Py (88%, 2 steps); (f) NaOMe, MeOH/DCM followed by Pd(OH)<sub>2</sub>/C, H<sub>2</sub>, <sup>t</sup>BuOH/AcOH/H<sub>2</sub>O (71%, 2 steps).

**5-Aminopentyl O-(2-acetamido-2-deoxy-β-D-mannopyranosyl)-(1→4)-2-acetamido-2-deoxy-β-D-glucopyranoside (6).** According to general procedure for reduction of azido and Troc groups, compound **S15** was prepared from **S14**<sup>5</sup> (49.0 mg, 0.0441 mmol) with zinc metal

power (143 mg, 2.20 mmol) in AcOH/Ac<sub>2</sub>O/THF (12 mL) and saturated CuSO<sub>4(aq)</sub> (0.2 mL). The resulting yellow oil was purified by flash chromatography over silica gel (MeOH/DCM, 1/30, v/v) to give **S15** (41.3 mg, 82%) as an amorphous white solid: *R<sub>f</sub>* = 0.35 (MeOH/DCM, 1/15, v/v). HR MALDI-TOF MS: *m/z*: calcd for C<sub>68</sub>H<sub>75</sub>N<sub>3</sub>O<sub>13</sub> [M+Na]<sup>+</sup>: 1164.5198; found: 1164.5220.

According to general procedure for hydrogenolysis, compound **6** was prepared from **S15** with

Pd(OH)<sub>2</sub>/C (100 mg, 20 wt.%, Degussa type) in a mixture of <sup>t</sup>BuOH/AcOH/H<sub>2</sub>O (10 mL). Compound **6** (14.0 mg, 76%) was obtained as an amorphous white solid. <sup>1</sup>H NMR (500 MHz, D<sub>2</sub>O): δ 4.92 (s, 1H, H-1<sup>II</sup>), 4.58 (d, 1H, *J* = 4 Hz, H-2<sup>II</sup>), 4.52 (d, 1H, *J* = 6.5 Hz, H-1<sup>I</sup>), 3.95-3.82 (m, 5H, H-6e<sup>I</sup>, H-3<sup>II</sup>, H-6a<sup>II</sup>, H-6e<sup>II</sup> and CHH-Linker), 3.77-3.72 (m, 4H, H-2<sup>I</sup>, H-3<sup>I</sup>, H-4<sup>I</sup> and H-6a<sup>I</sup>), 3.64-3.60 (m, 1H, CHH-Linker), 3.57-3.46 (m, 3H, H-5<sup>I</sup>, H-4<sup>II</sup> and H-5<sup>II</sup>), 3.01 (t, 2H, *J* = 8.3 Hz, CH<sub>2</sub>-Linker), 2.09 (s, 3H), 2.06 (s, 3H), 1.73-1.66 (m, 2H, CH<sub>2</sub>-Linker), 1.65-1.59 (m, 2H, CH<sub>2</sub>-Linker), 1.45-1.40 (m, 2H, CH<sub>2</sub>-Linker); <sup>13</sup>C NMR (HSQC, 125 MHz, D<sub>2</sub>O): δ 103.79 (C-1<sup>I</sup>), 102.11 (C-1<sup>II</sup>), 81.59 (C-4<sup>I</sup>), 79.22 (C-5<sup>II</sup>), 77.23 (C-5<sup>I</sup>), 75.01 (C-3<sup>I</sup>), 74.77 (C-3<sup>II</sup>), 72.88, 69.32 (C-4<sup>II</sup>), 63.00 (C-6<sup>I</sup> and <sup>II</sup>), 58.25 (C-2<sup>I</sup>), 55.90 (C-2<sup>II</sup>), 42.13, 30.82, 29.11, 25.03, 24.81, 24.77. HR MALDI-TOF MS: *m/z*: calcd for C<sub>21</sub>H<sub>39</sub>N<sub>3</sub>O<sub>11</sub> [M+Na]<sup>+</sup>: 532.2482; found: 532.2521.

***N*-Benzyl-*N*-benzyloxycarbonyl-5-aminopentyl *O*-(2-azido-3,6-di-*O*-benzyl-2-deoxy-β-D-mannopyranosyl)-(1→4)-2-azido-6-*O*-benzyl-2-deoxy-3-*O*-(2-methylnaphthyl)-β-D-glucopyranoside (S16).** According to general procedure for reductive opening of a 4,6-benzylidene, compound **S16** was prepared from a mixture of compound **S14**<sup>5</sup> (265 mg, 0.239 mmol) and 4 Å molecular sieves (400 mg) in DCM (7.9 mL) with triethylsilane (95 μL, 0.59 mmol) and triflic acid (46 μL, 0.52 mmol). The reaction was warmed to -40 °C over a period of 1 h. The resulting yellow oil was purified by flash chromatography over silica gel (EtOAc/hexanes, 1/2, v/v) to give **S16** (196 mg, 74%) as an amorphous white solid: *R<sub>f</sub>* = 0.31 (EtOAc/hexanes, 1/2, v/v). <sup>1</sup>H NMR (500 MHz, CDCl<sub>3</sub>): δ 7.84-7.11 (m, 32H), 5.18-5.14 (m, 3H, NC[=O]CH<sub>2</sub>Ph and OCHHNap), 4.96 (d, 1H, *J* = 11.5 Hz, OCHHNap), 4.66 (d, 1H, *J* = 12 Hz, OCHHNap), 4.59 (s, 1H, H-1<sup>II</sup>), 4.56-4.43 (m, 5H, NCH<sub>2</sub>Ph and three protons from OCH<sub>2</sub>Ph), 4.21-4.16 (m, 2H, OCH<sub>2</sub>Ph), 3.95 (t, 1H, *J* = 9.3 Hz, H-4<sup>I</sup>), 3.87-3.84 (m, 1H, CHH-Linker), 3.80-3.68 (m, 4H, H-6a<sup>I</sup>, H-6e<sup>I</sup>, H-2<sup>II</sup> and H-4<sup>II</sup>), 3.49-3.37 (m, 6H, H-2<sup>I</sup>, H-3<sup>I</sup>, H-5<sup>I</sup>, H-6a<sup>II</sup>, H-6e<sup>II</sup> and CHH-Linker),

3.28-3.13 (m, 4H, H-3<sup>II</sup>, H-5<sup>II</sup> and CH<sub>2</sub>-Linker), 2.80 (s, 1H, hydroxyl proton), 1.68-1.46 (m, 4H, two CH<sub>2</sub>-Linker); 1.42-1.26 (m, 2H, CH<sub>2</sub>-Linker); <sup>13</sup>C NMR (75 MHz, CDCl<sub>3</sub>): δ 156.89, 156.45, 138.02, 137.81, 137.76, 136.91, 136.18, 133.37, 133.05, 128.66, 128.63, 128.54, 128.48, 128.42, 128.10, 128.07, 128.01, 127.95, 127.92, 127.83, 127.78, 127.71, 127.61, 127.38, 126.63, 126.21, 126.07, 125.83, 102.19 (C-1<sup>I</sup>), 99.56 (C-1<sup>II</sup>), 81.25 (C-3<sup>I</sup>), 80.42 (C-3<sup>II</sup>), 77.02 (C-4<sup>I</sup>), 75.05, 74.51 (C-5<sup>I</sup>), 74.34 (C-5<sup>II</sup>), 73.73, 73.60, 72.20, 70.94 (C-6<sup>II</sup>), 69.98, 69.09 (C-4<sup>II</sup>), 68.63 (C-6<sup>I</sup>), 67.24, 66.24 (C-2<sup>I</sup>), 61.59 (C-2<sup>II</sup>), 50.60, 50.34, 47.20, 46.26, 29.27, 27.93, 27.50, 23.27. HR MALDI-TOF MS: m/z: calcd for C<sub>64</sub>H<sub>69</sub>N<sub>7</sub>O<sub>11</sub> [M+Na]<sup>+</sup>: 1134.4953; found: 1134.4979.

***N*-Benzyl-*N*-benzyloxycarbonyl-5-aminopentyl *O*-[3-*O*-acetyl-4,6-*O*-di-*tert*-butylsilylene-2-deoxy-2-(2,2,2-trichloroethoxy)carbonylamino- $\alpha$ -D-galactopyranosyl]-(1 $\rightarrow$ 4)-*O*-(2-azido-3,6-di-*O*-benzyl-2-deoxy- $\beta$ -D-mannopyranosyl)-(1 $\rightarrow$ 4)-2-azido-6-*O*-benzyl-2-deoxy-3-*O*-(2-methylnaphthyl)- $\beta$ -D-glucopyranoside (S18).** A mixture of the glycosyl acceptor **S16** (92.5 mg, 0.0833 mmol) and donor **S17**<sup>6</sup> (62.7 mg, 0.10 mmol), 4 Å molecular sieves (250 mg) in DCM (3 mL) was stirred under an atmosphere of Ar for 1 h. The reaction was cooled (-20 °C) and NIS (34 mg, 0.15 mmol) was added followed by the addition of TMSOTf (4.0  $\mu$ L, 0.022 mmol). After stirring for 1.5 h, the reaction was quenched by the addition of pyridine (0.1 mL). The mixture was filtered, and the filtrate (100 mL) was washed with 10% Na<sub>2</sub>S<sub>2</sub>O<sub>3</sub> (80 mL) and brine (80 mL). The organic phase was dried (MgSO<sub>4</sub>), filtered and the filtrate was concentrated under reduced pressure. The resulting yellow oil was purified by flash chromatography over silica gel (EtOAc/hexanes, 1/4, v/v) to give **S18** (95.0 mg, 70%) as an amorphous white solid: *R*<sub>f</sub> = 0.33 (EtOAc/hexanes, 2/5, v/v). <sup>1</sup>H NMR (500 MHz, CDCl<sub>3</sub>): δ 7.82-7.06 (m, 32H), 6.21 (d, 1H, *J* = 9.5 Hz, *NHTroc*), 5.20-5.12 (m, 4H, H-1<sup>III</sup>, NC[=O]CH<sub>2</sub>Ph and OCHHNap), 5.00 (d, 1H, *J* = 11.5 Hz, OCHHNap), 4.87 (d, 1H, *J* = 12.5 Hz, OCHHPH), 4.77 (dd, 1H, *J* = 2.5 Hz and 11 Hz,

H-3<sup>III</sup>), 4.69-4.33 (m, 11H, H-1<sup>II</sup>, H-2<sup>III</sup>, H-4<sup>III</sup>, OCH<sub>2</sub>CCl<sub>3</sub>, NCH<sub>2</sub>Ph and four proton from OCH<sub>2</sub>Ph), 4.22-4.17 (m, 2H, H-1<sup>I</sup> and OCHHPH), 3.97-3.83 (m, 5H, H-4<sup>I</sup>, H-6a<sup>I</sup>, H-6e<sup>I</sup>, H-4<sup>II</sup> and CHH-Linker), 3.72 (s, 3H, H-2<sup>II</sup>, H-6a<sup>III</sup> and H-6e<sup>III</sup>), 3.46-3.19 (m, 10H, H-2<sup>I</sup>, H-3<sup>I</sup>, H-5<sup>I</sup>, H-3<sup>II</sup>, H-6a<sup>II</sup>, H-6e<sup>II</sup>, H-5<sup>III</sup> and three protons from CH<sub>2</sub>-Linker), 2.64 (m, 1H, H-5<sup>II</sup>), 2.08 (s, 3H), 1.66-1.48 (m, 4H, two CH<sub>2</sub>-Linker); 1.42-1.28 (m, 2H, CH<sub>2</sub>-Linker), 1.03 (s, 9H), 1.00 (s, 9H); <sup>13</sup>C NMR (75 MHz, CDCl<sub>3</sub>): δ 171.30, 156.87, 156.41, 154.48, 138.20, 138.09, 137.16, 136.42, 136.19, 133.35, 133.03, 129.00, 128.76, 128.70, 128.62, 128.45, 128.39, 128.12, 128.08, 128.04, 127.99, 127.86, 127.63, 127.60, 127.45, 126.41, 126.21, 126.06, 125.93, 102.33 (C-1<sup>I</sup>), 100.43 (C-1<sup>III</sup>), 99.34 (C-1<sup>II</sup>), 95.84, 80.96 (C-3<sup>I</sup>), 79.80 (C-3<sup>II</sup>), 77.44 (C-4<sup>I</sup>), 77.03 (C-5<sup>II</sup>), 75.63, 74.99, 74.78 (C-5<sup>I</sup>), 74.66, 74.34, 73.82, 73.68 (C-4<sup>II</sup>), 73.33, 71.63 (C-3<sup>III</sup>), 70.97, 70.47 (C-4<sup>III</sup>), 70.09, 68.83 (C-6<sup>II and III</sup>), 68.37 (C-5<sup>III</sup>), 67.31, 66.88 (C-6<sup>I</sup>), 66.42 (C-2<sup>I</sup>), 60.78 (C-2<sup>II</sup>), 50.68, 50.41, 49.65 (C-2<sup>III</sup>), 47.23, 46.32, 29.85, 29.35, 27.69, 27.42, 27.31, 23.43, 23.35, 21.13, 20.88. HR MALDI-TOF MS: m/z: calcd for C<sub>83</sub>H<sub>99</sub>Cl<sub>3</sub>N<sub>8</sub>O<sub>18</sub>Si [M+Na]<sup>+</sup>: 1651.5810; found: 1651.5842.

***N*-Benzyl-*N*-benzyloxycarbonyl-5-aminopentyl *O*-[3,4,6-tri-*O*-acetyl-2-deoxy-2-(2,2,2-trichloroethoxy)carbonylamino- $\alpha$ -D-galactopyranosyl]-(1 $\rightarrow$ 4)-*O*-(2-azido-3,6-di-*O*-benzyl-2-deoxy- $\beta$ -D-mannopyranosyl)-(1 $\rightarrow$ 4)-2-azido-6-*O*-benzyl-2-deoxy-3-*O*-(2-methylnaphthyl)- $\beta$ -D-glucopyranoside (S19).** To a stirred and cooled (0° C) solution of **S18** (88 mg, 0.054 mmol) in THF (3 mL) was added HF·Py (0.5 mL) under an atmosphere of Ar. After stirring at room temperature for 5 h, the mixture was diluted with DCM (100 mL) and washed with saturated NaHCO<sub>3</sub> (2  $\times$  80 mL), brine (80 mL). The organic layer was dried (MgSO<sub>4</sub>), filtered and the filtrate was concentrated under reduced pressure. The crude product was dissolved in pyridine (2 mL) and acetic anhydride (0.1 mL, 1 mmol) was added. After stirring for 12 h, the reaction mixture was diluted with DCM (100 mL) and washed with

saturated NaHCO<sub>3</sub> (2 × 80 mL) and brine (80 mL). The organic phase was dried (MgSO<sub>4</sub>), filtered and the filtrate was concentrated under reduced pressure. The resulting yellow oil was purified by flash chromatography over silica gel (EtOAc/hexanes, 1/2, v/v) to give **S19** (74.8 mg, 88% over 2 steps) an amorphous white solid: *R<sub>f</sub>* = 0.29 (EtOAc/hexanes, 1/2, v/v). <sup>1</sup>H NMR (500 MHz, CDCl<sub>3</sub>): δ 7.79-7.14 (m, 32H), 6.59 (d, 1H, *J* = 9.5 Hz, *NHTroc*), 5.29 (d, 1H, *J* = 2.5 Hz, H-4<sup>III</sup>), 5.18-5.14 (m, 4H, H-1<sup>III</sup>, NC[=O]CH<sub>2</sub>Ph and OCHHNap), 5.03 (dd, 1H, *J* = 3.3 Hz and 11.3 Hz, H-3<sup>III</sup>), 4.97 (d, 1H, *J* = 12 Hz, OCHHNap), 4.85 (d, 1H, *J* = 12 Hz, OCHHPh), 4.67 (d, 2H, *J* = 12 Hz, OCHHPh and OCHHCCl<sub>3</sub>), 4.52-4.36 (m, 7H, H-1<sup>II</sup>, OCHHCCl<sub>3</sub>, three protons from OCH<sub>2</sub>Ph and NCH<sub>2</sub>Ph), 4.30-4.21 (m, 3H, H-1<sup>I</sup>, H-2<sup>III</sup> and OCHHPh), 4.01-3.92 (m, 4H, H-4<sup>I</sup>, H-4<sup>II</sup>, H-5<sup>III</sup> and H-6e<sup>III</sup>), 3.88-3.84 (m, 2H, H-6a<sup>III</sup> and CHH-Linker), 3.78 (br d, 1H, *J* = 2.5 Hz, H-2<sup>II</sup>), 3.75-3.70 (m, 2H, H-6a<sup>I</sup> and H-6e<sup>I</sup>), 3.54-3.37 (m, 6H, H-2<sup>I</sup>, H-3<sup>I</sup>, H-5<sup>I</sup>, H-6a<sup>II</sup>, H-6e<sup>II</sup> and CHH-Linker), 3.26-3.22 (m, 3H, H-3<sup>II</sup>, CH<sub>2</sub>-Linker), 2.77-2.75 (m, 1H, H-5<sup>II</sup>), 2.14 (s, 3H), 1.98 (s, 3H), 1.88 (s, 3H), 1.67-1.47 (m, 4H, two CH<sub>2</sub>-Linker); 1.42-1.26 (m, 2H, CH<sub>2</sub>-Linker); <sup>13</sup>C NMR (75 MHz, CDCl<sub>3</sub>): δ 207.05, 170.61, 170.42, 170.38, 156.88, 156.35, 154.56, 138.24, 138.09, 138.02, 136.96, 136.12, 133.36, 133.05, 129.12, 128.81, 128.74, 128.70, 128.61, 128.56, 128.43, 128.10, 128.07, 128.04, 127.99, 127.94, 127.84, 127.62, 127.52, 127.45, 126.45, 126.23, 126.03, 125.96, 102.33 (C-1<sup>I</sup>), 100.70 (C-1<sup>III</sup>), 99.40 (C-1<sup>II</sup>), 95.80, 80.75 (C-3<sup>I</sup>), 78.84 (C-3<sup>II</sup>), 77.13 (C-4<sup>I</sup>), 75.66 (C-5<sup>II</sup>), 75.06, 74.80 (C-4<sup>II</sup>), 74.65, 74.37, 73.82 (C-5<sup>I</sup>), 73.27, 70.60, 70.10, 68.99 (C-6<sup>I</sup>), 68.88 (C-3<sup>III</sup>), 68.38 (C-6<sup>II</sup>), 67.99 (C-5<sup>III</sup>), 67.49 (C-4<sup>III</sup>), 67.30, 66.44 (C-2<sup>I</sup>), 62.20 (C-6<sup>III</sup>), 60.50 (C-2<sup>II</sup>), 50.68 (C-2<sup>III</sup>), 50.41, 47.23, 46.30, 31.08, 29.86, 29.35, 28.00, 27.58, 23.35, 20.88, 20.74. HR MALDI-TOF MS: *m/z*: calcd for C<sub>79</sub>H<sub>87</sub>Cl<sub>3</sub>N<sub>8</sub>O<sub>20</sub> [M+Na]<sup>+</sup>: 1595.5000; found: 1595.5023.

**5-Aminopentyl *O*-(2-acetamido-2-deoxy- $\alpha$ -D-galactopyranosyl)-(1 $\rightarrow$ 4)-*O*-(2-acetamido-2-deoxy- $\beta$ -D-mannopyranosyl)-(1 $\rightarrow$ 4)-2-acetamido-2-deoxy- $\beta$ -D-glucopyranoside (7).**

According to general procedure for reduction of azido and Troc groups, compound **S20** was prepared from **S19** (35.2 mg, 0.0224 mmol) with zinc metal powder (73 mg, 1.1 mmol) in AcOH/Ac<sub>2</sub>O/THF (7 mL) and saturated CuSO<sub>4(aq)</sub> (0.2 mL). The resulting yellow oil was purified by flash chromatography over silica gel (MeOH/DCM, 1/30, v/v) to give **S20** (22.7 mg, 69%) as an amorphous white solid:  $R_f = 0.32$  (MeOH/DCM, 1/15, v/v). HR MALDI-TOF MS:  $m/z$ : calcd for C<sub>82</sub>H<sub>96</sub>N<sub>4</sub>O<sub>21</sub> [M+Na]<sup>+</sup>: 1495.6465; found: 1495.6479. According to general procedure for ester and carbamate deprotection, deprotected compound was prepared from **S20** (22.7 mg, 0.0154 mmol) with NaOMe in a methanolic solution (0.16 mL, 1.0 M, 0.16 mmol) in a mixture of MeOH/DCM (4 mL). According to general procedure for hydrogenolysis, compound **7** was prepared from the crude product of previous step with Pd(OH)<sub>2</sub>/C (50 mg, 20 wt.%, Degussa type) in a mixture of *t*-BuOH/AcOH/H<sub>2</sub>O (5 mL). Compound **7** (8.3 mg, 76% over 2 steps) was obtained as an amorphous white solid. <sup>1</sup>H NMR (500 MHz, D<sub>2</sub>O):  $\delta$  5.32 (d, 1H,  $J = 4$  Hz, H-1<sup>III</sup>), 4.92 (s, 1H, H-1<sup>II</sup>), 4.55-4.51 (m, 2H, H-1<sup>I</sup> and H-2<sup>II</sup>), 4.21 (dd, 1H,  $J = 4.3$  Hz and 11.3 Hz, H-2<sup>III</sup>), 4.09 (dd, 1H,  $J = 4.8$  Hz and 9.3 Hz, H-3<sup>II</sup>), 4.03-4.01 (m, 2H, H-4<sup>III</sup> and H-5<sup>III</sup>), 3.96-3.88 (m, 5H, H-6e<sup>I</sup>, H-6a<sup>II</sup>, H-6e<sup>II</sup>, H-3<sup>III</sup> and CHHLinker), 3.79-3.70 (m, 7H, H-2<sup>I</sup>, H-3<sup>I</sup>, H-4<sup>I</sup>, H-6a<sup>I</sup>, H-4<sup>II</sup>, H-6a<sup>III</sup> and H-6e<sup>III</sup>), 3.64-3.52 (m, 3H, H-5<sup>I</sup>, and H-5<sup>II</sup> and CHHLinker), 3.01 (t, 2H,  $J = 7.8$  Hz, CH<sub>2</sub>-Linker), 2.09 (s, 3H), 2.06 (s, 6H), 1.75-1.66 (m, 2H, CH<sub>2</sub>-Linker), 1.65-1.59 (m, 2H, CH<sub>2</sub>Linker), 1.45-1.39 (m, 2H, CH<sub>2</sub>Linker); <sup>13</sup>C NMR (HSQC, 125 MHz, D<sub>2</sub>O):  $\delta$  101.34 (C-1<sup>I</sup>), 99.41 (C-1<sup>II</sup>), 98.49 (C-1<sup>III</sup>), 79.14 (C-4<sup>I</sup>), 75.38 (C-5<sup>I</sup>), 74.61 (C-5<sup>II</sup>), 73.24 (C-3<sup>I</sup>), 72.91 (C-3<sup>II</sup>), 72.50 (C-4<sup>II</sup>), 71.88 (C-5<sup>III</sup>), 70.32, 68.62 (C-4<sup>III</sup>), 67.64 (C-3<sup>III</sup>), 61.38 (C-6<sup>III</sup>), 60.74 (C-6<sup>II</sup>), 60.29 (C-6<sup>I</sup>), 55.38 (C-2<sup>I</sup>), 53.84 (C-2<sup>II</sup>), 49.95 (C-2<sup>III</sup>), 39.48, 28.24, 26.55, 22.28,

22.24, 22.15. HR MALDI-TOF MS: m/z: calcd for C<sub>29</sub>H<sub>52</sub>N<sub>4</sub>O<sub>16</sub> [M+Na]<sup>+</sup>: 735.3276; found: 735.3301.

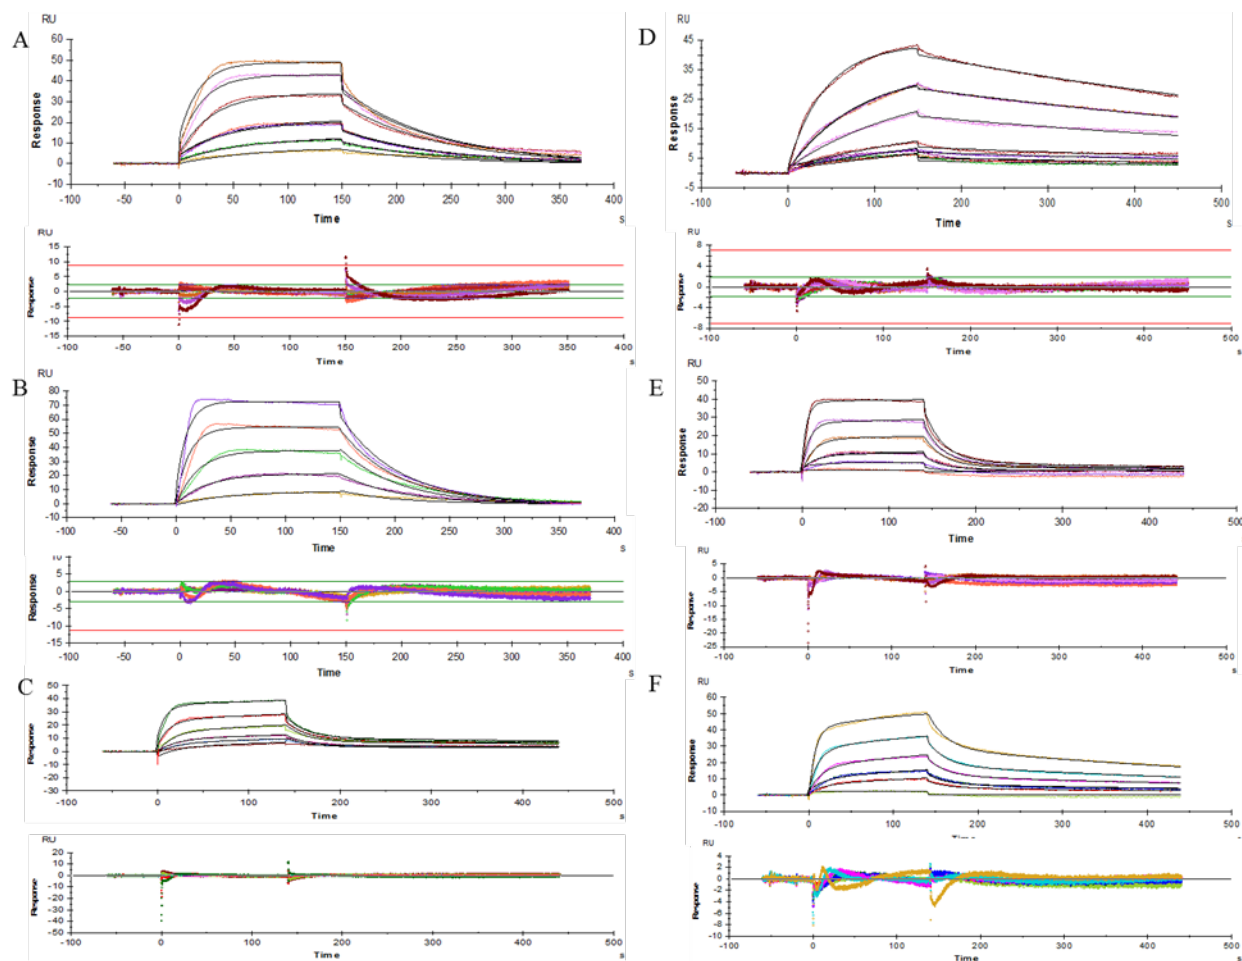

**Figure S2.** Sensorgrams and corresponding residual plots of the concentration-dependent kinetic analysis for the binding of compounds **1** and **3-7** with immobilized C-terminal PlyL (3000 Ru). A) **1** at concentrations from the bottom to top of 6.25, 12.5, 25, 50, 80 and 100  $\mu$ M, fitting with 1:1 binding model. B) **3** at concentrations from the bottom to top of 0.2, 1, 2, 4 and 5  $\mu$ M, fitting with 1:1 binding model. C) **4** at concentrations from the bottom to top of 15.6, 62.5, 125, 250, 500 and 1000  $\mu$ M, fitting with two-state binding model. D) **5** at concentrations from the bottom to top of 3.12, 6.25, 12.5, 25, 50 and 100  $\mu$ M, fitting with 1:1 binding model. E) **6** and F) **7** at concentrations from the bottom to top of 7.8, 31.2, 62.5, 125, 250 and 500  $\mu$ M, fitting with two-state binding model.



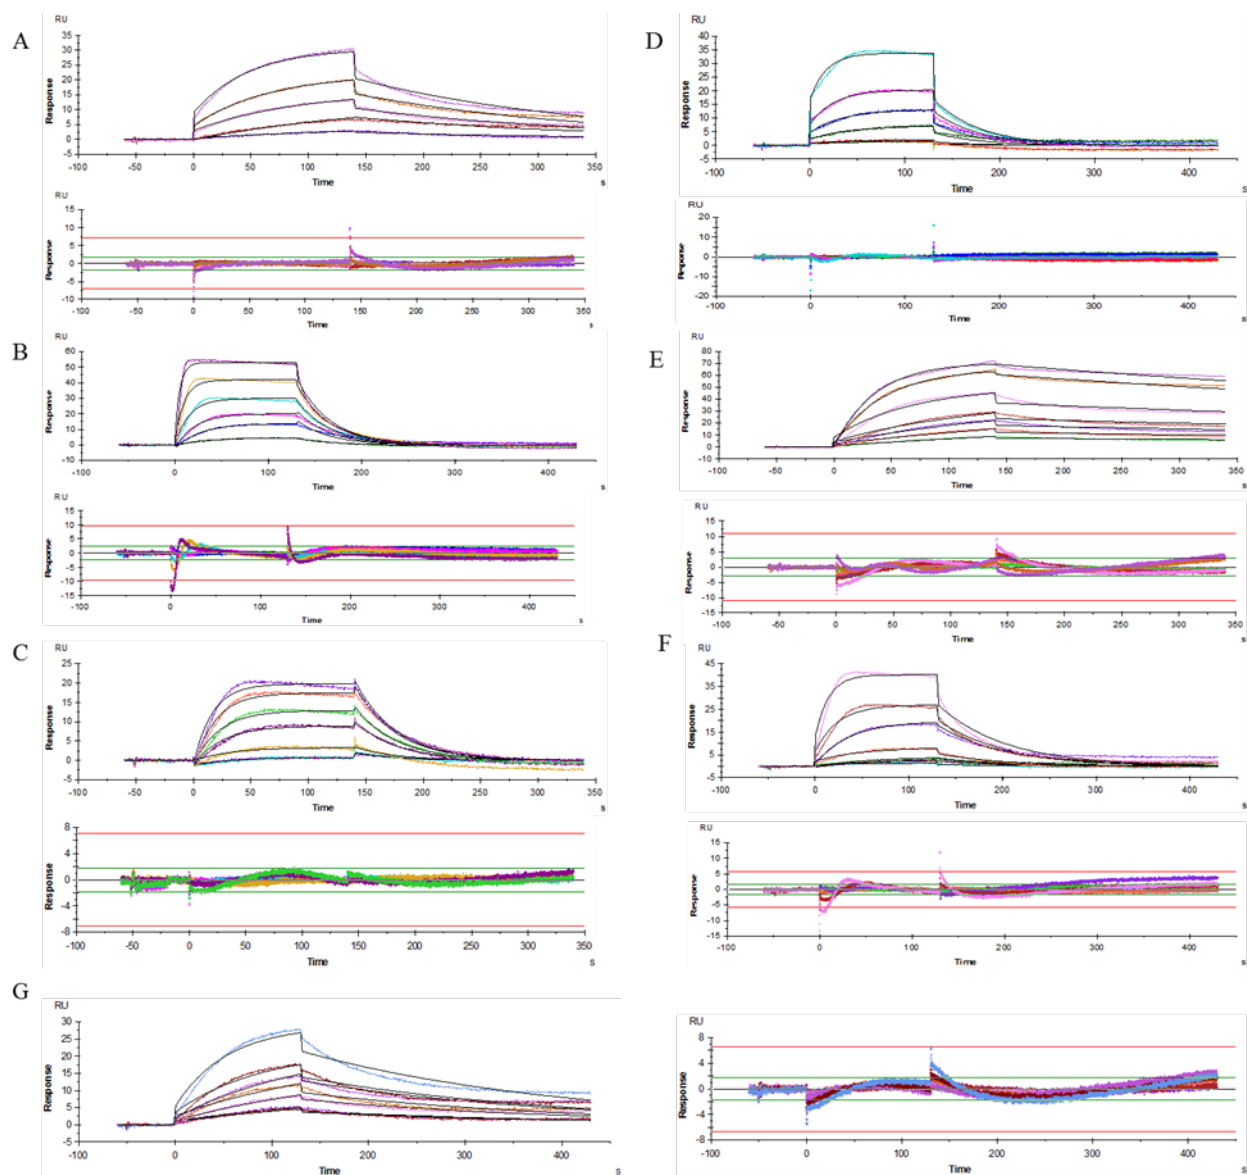

**Figure S3.** Sensorgrams and corresponding residual plots of the concentration-dependent kinetic analysis for the binding of compounds **1-7** with immobilized C-terminal PlyG (3500 Ru). A) **1** at concentrations from the bottom to top of 3.12, 6.25, 30, 50, 80  $\mu\text{M}$ , fitting with 1:1 binding model. B) **2** at concentrations from the bottom to top of 0.78, 3.12, 6.25, 12.5, 25 and 50  $\mu\text{M}$ , fitting with 1:1 binding model. C) **3** at concentrations from the bottom to top of 0.1, 0.5, 1.5, 2, 3 and 4  $\mu\text{M}$ , fitting with 1:1 binding model. D) **4** at concentrations from the bottom to top of 3.9, 7.8, 31.2, 62.5, 125, and 250  $\mu\text{M}$ , fitting with two-state binding model. E) **5** at concentrations from the bottom to top of 3.12, 6.25, 12.5, 25, 50, 80 and 100  $\mu\text{M}$ , fitting with 1:1 binding model. F) **6** at concentrations from the bottom to top of 1.56, 3.12, 6.25, 25, 50, 100 and 200  $\mu\text{M}$ , fitting with two-state binding model. G) **7** at concentrations from the bottom to top of 1.56, 3.12, 6.25, 12.5 and 50  $\mu\text{M}$ , fitting with two-state binding model.

References:

1. Maiti, K. K. et. al. *Eur. J. Org. Chem.* **2010**, 80-91.
2. Arungundram, S. et. al. *J. Am. Chem. Soc.* **2009**, *131*, 17394-17405.
3. Gregg, P. J. et. al. *Tetrahedron* **1997**, *53*, 17727-11734.
4. Noti, C et. al. *Chem. Eur. J.* **2006**, *12*, 8664-8686.
5. Vasan, M. et. al. *ChemBioChem.* **2008**, *9*, 1716-1720.
6. Imamura, A. et. al. *Tetrahedron Lett.* **2003**, *44*, 6725-6728.



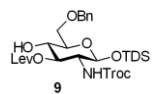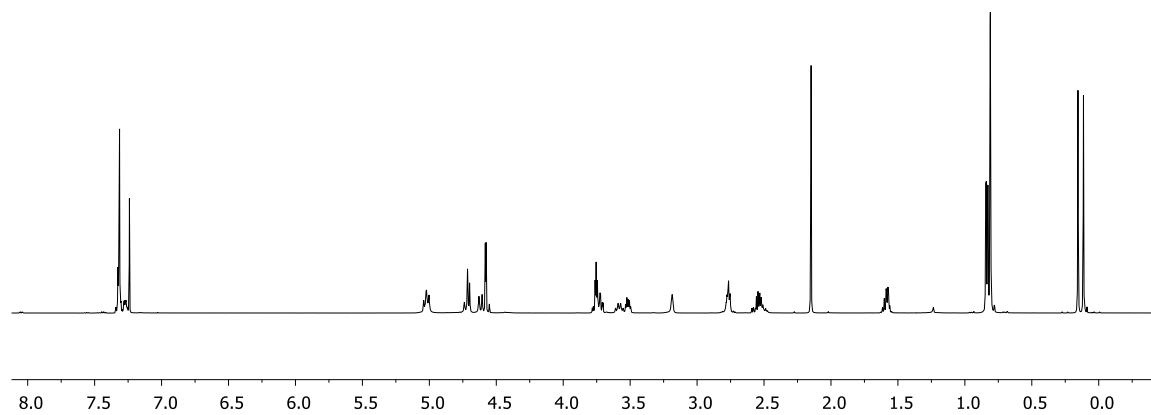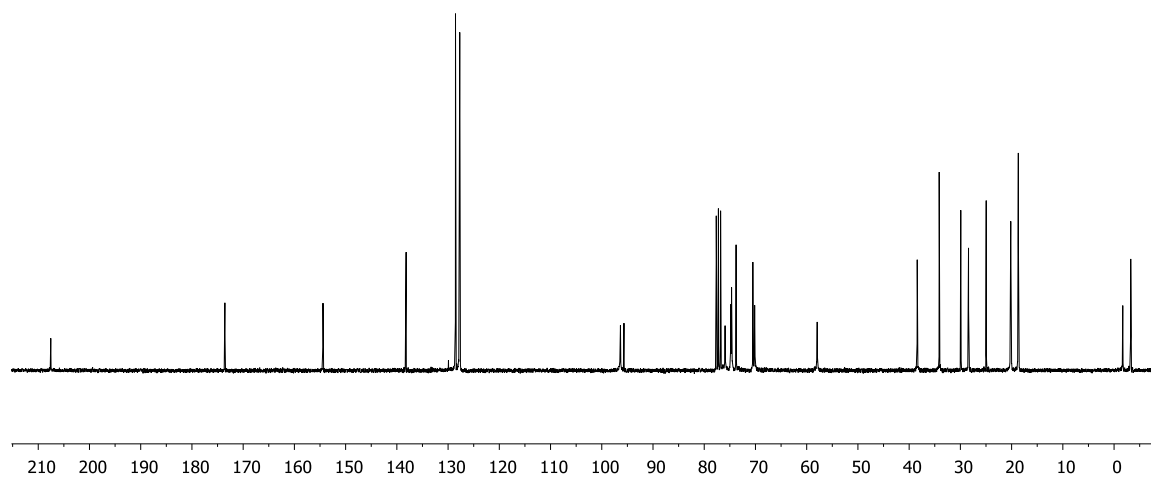

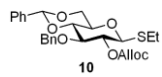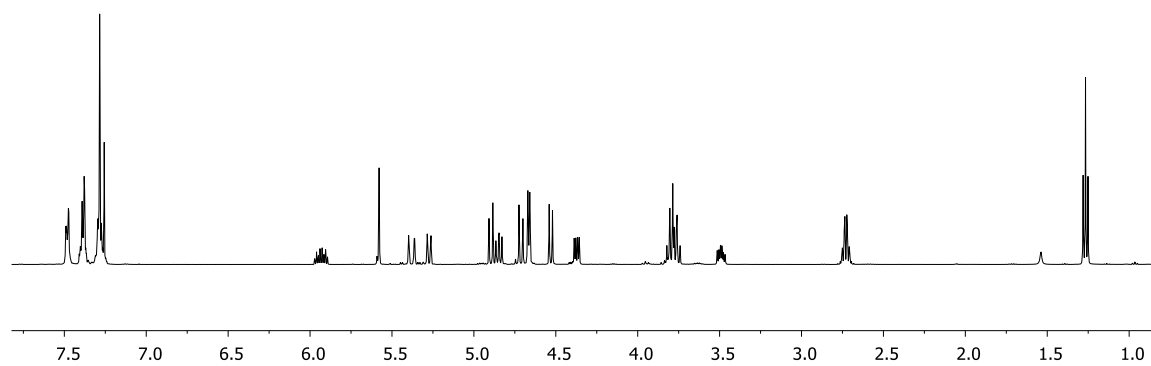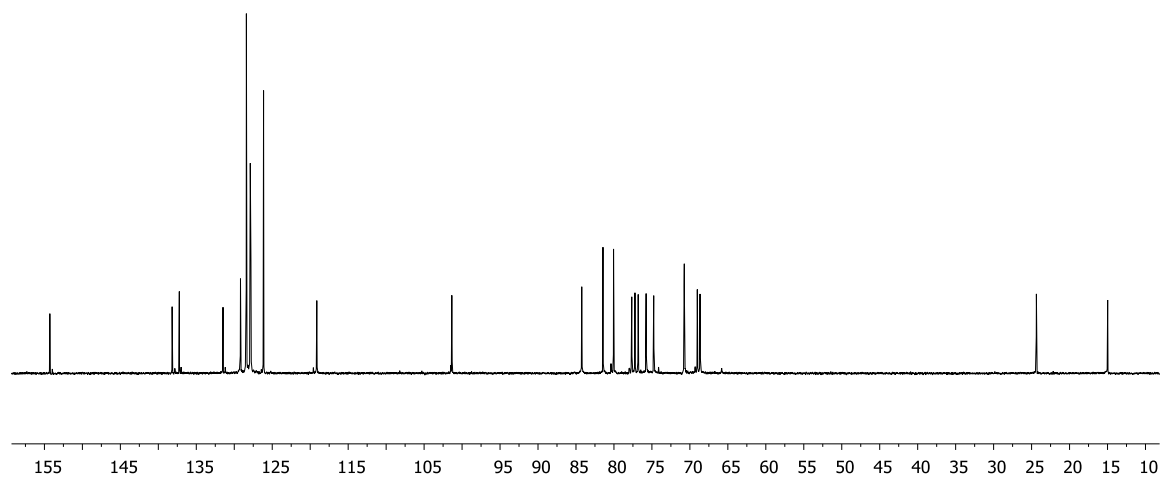

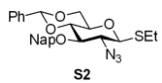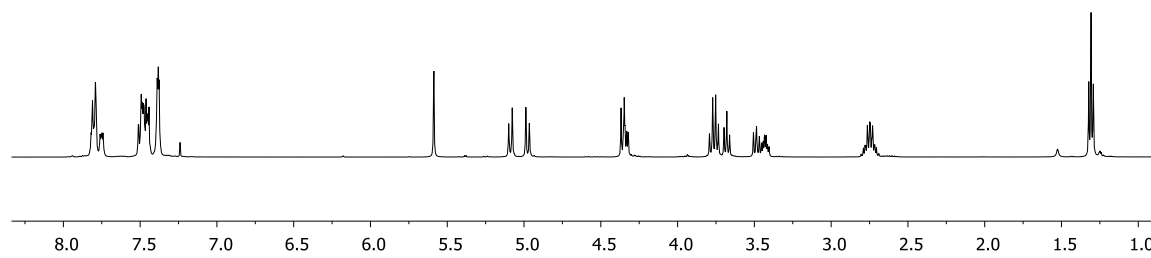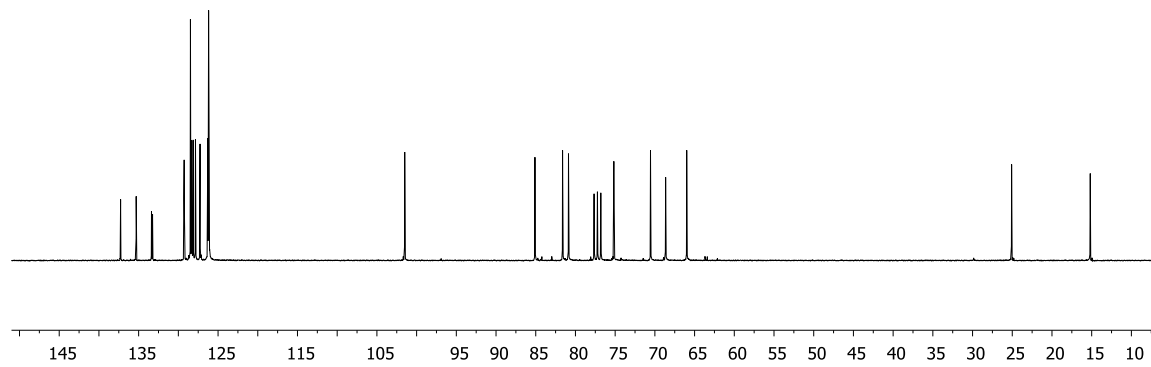

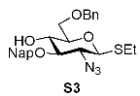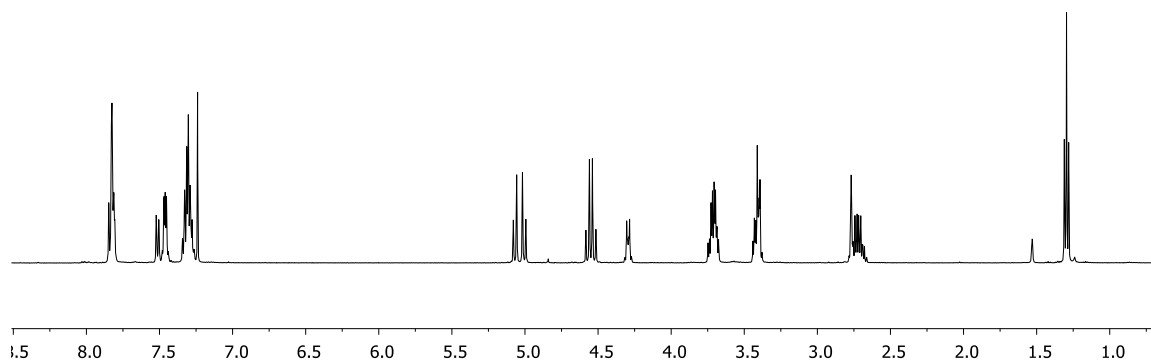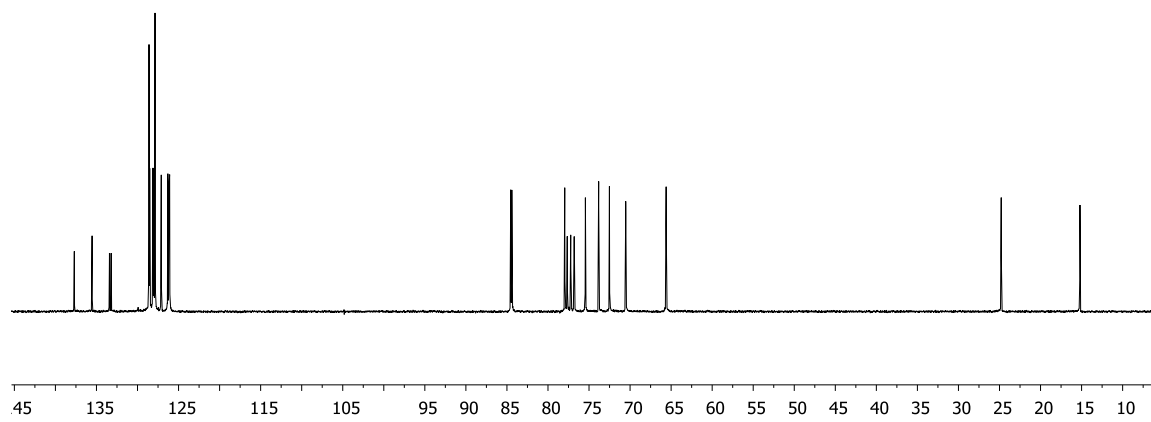

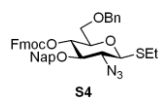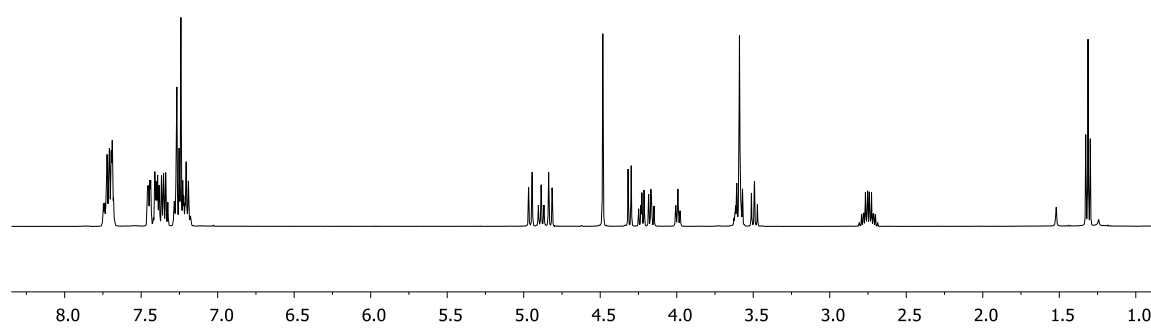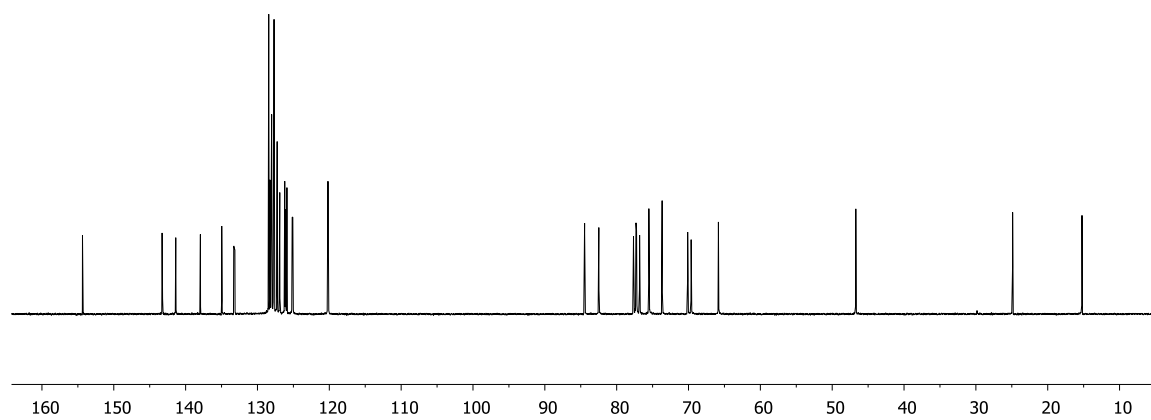



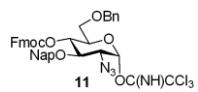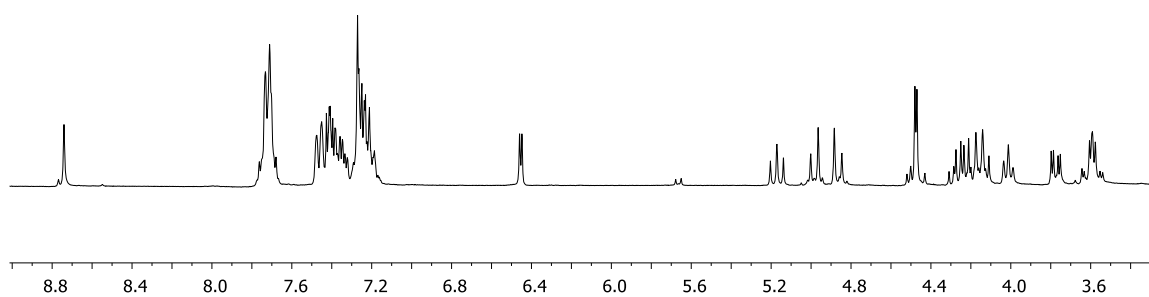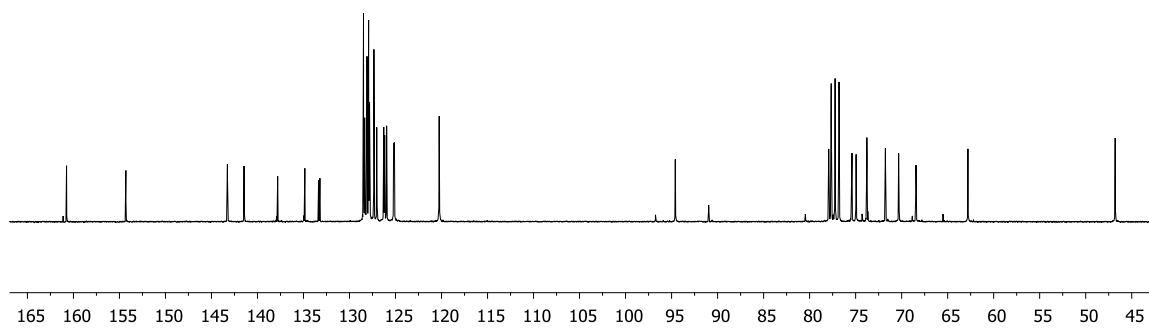



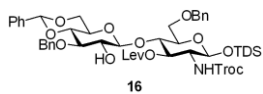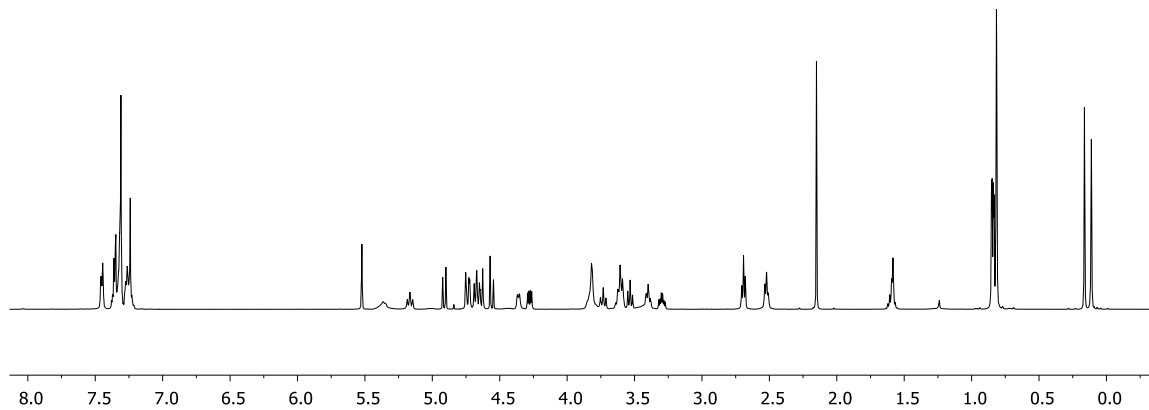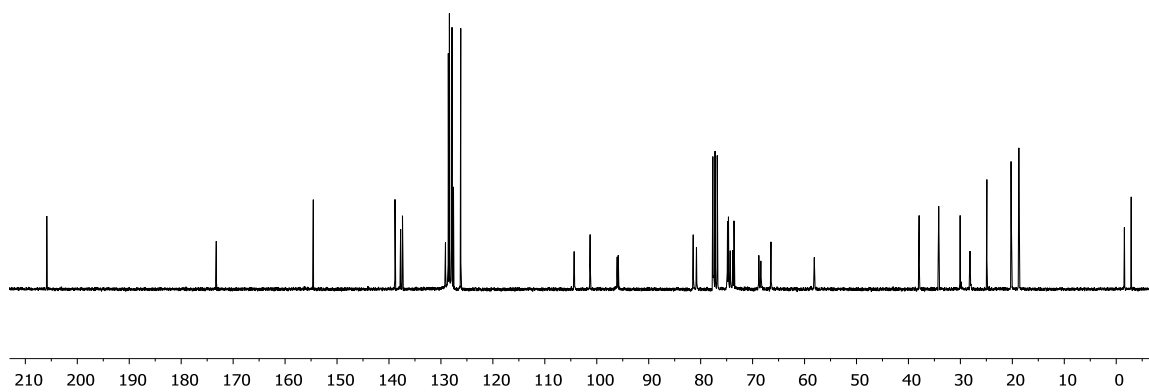





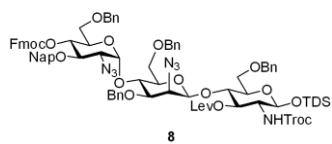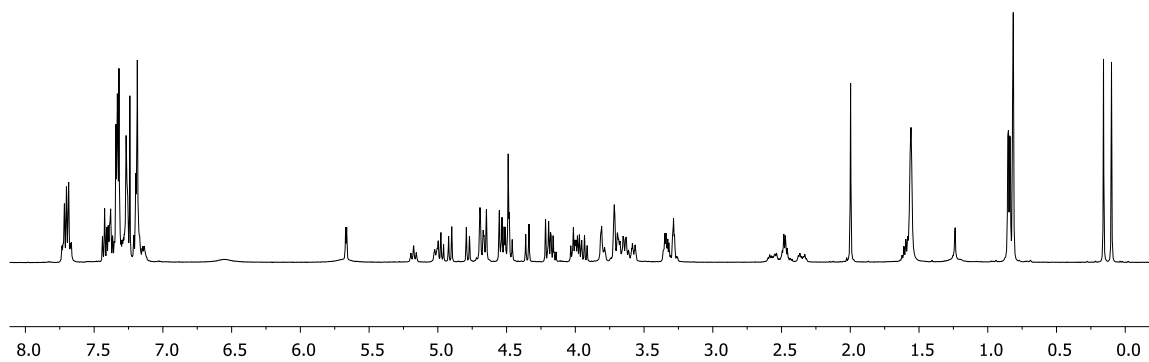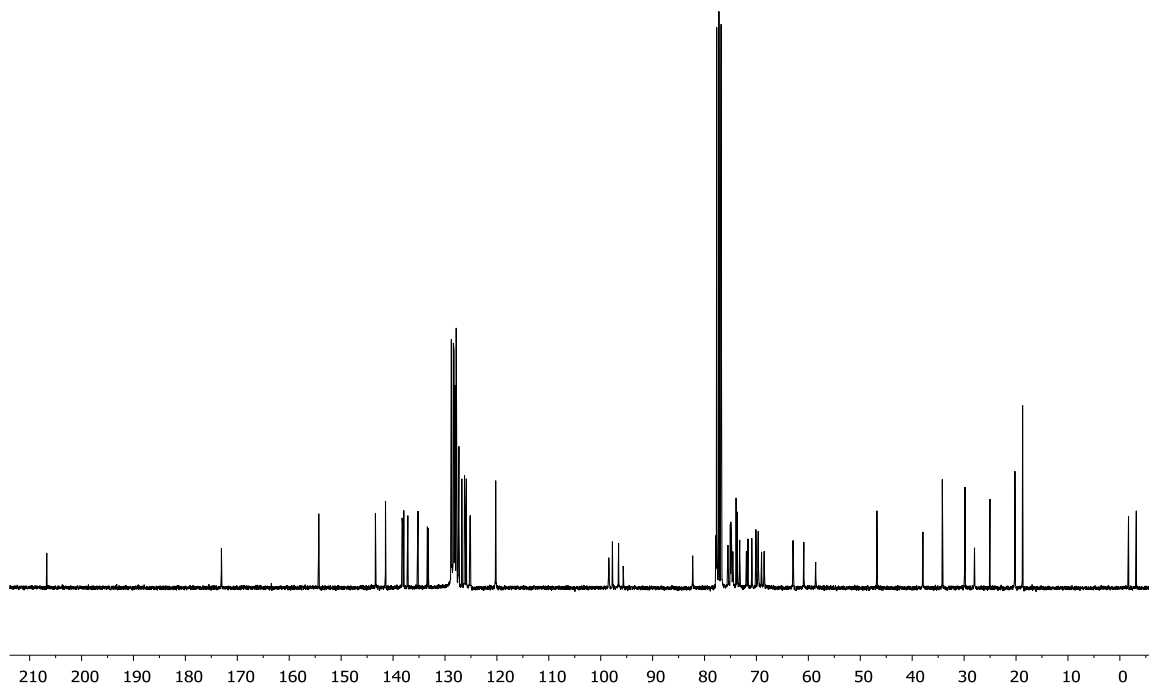

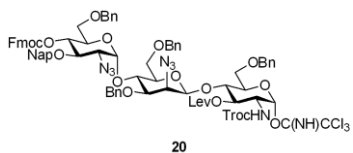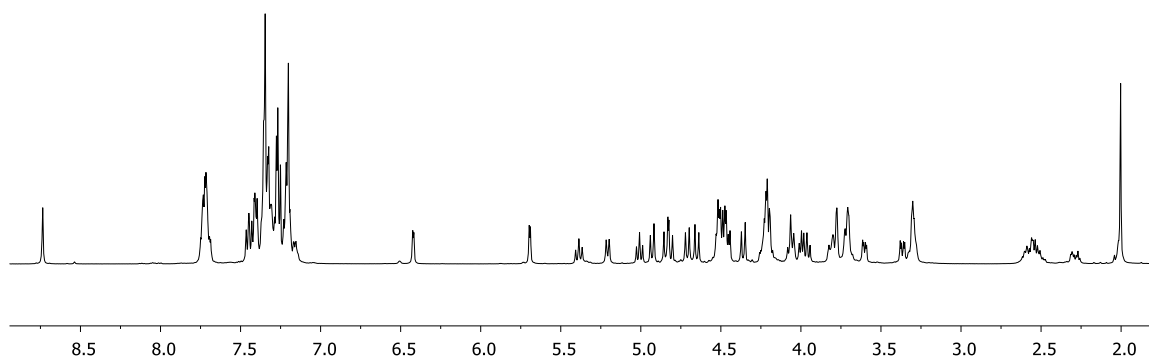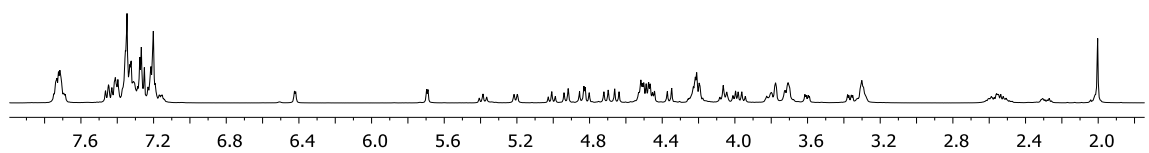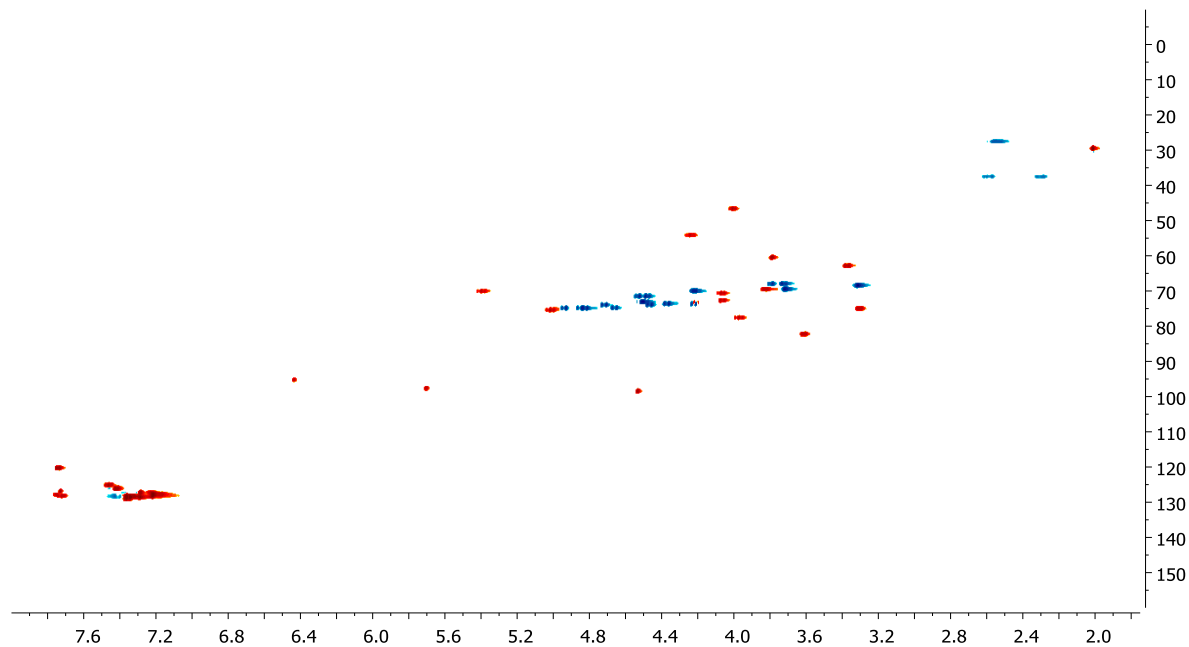







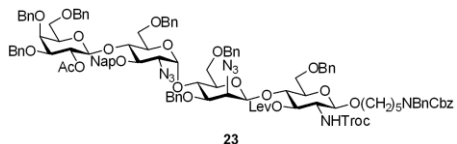

23

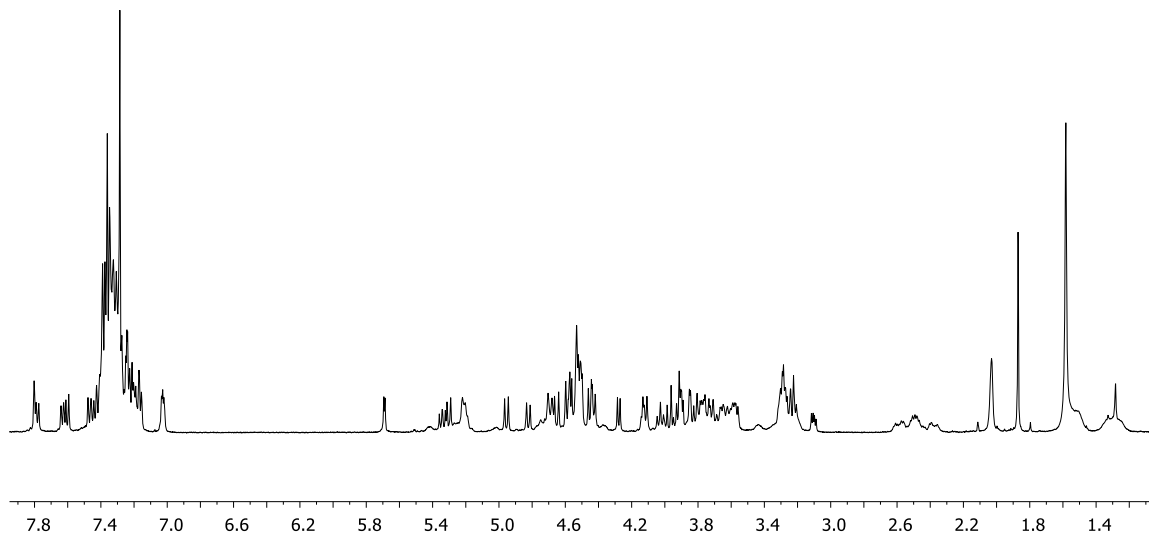

file: Tetra-de-Fmoc\_Carbon\_20100814\_01

lse Sequence: s2pul

solvent: cdc13

emp. 25.0 C / 298.1 K

erator: kaifor

le: Tetra-de-Fmoc\_Carbon\_20100814\_01

DVA-500 "nmr1"

slax. delay 1.000 sec

ulse 45.0 degrees

sq. time 1.300 sec

idth 36764.7 Hz

1000 repetitions

SERVE c13, 150.8012757 MHz

COUPLE H1, 599.7292832 MHz

ower 35 dB

ontinuously on

ALTZ-16 modulated

TA PROCESSING

ine broadening 0.5 Hz

size 131072

tal time 13 hr, 28 min, 31 sec

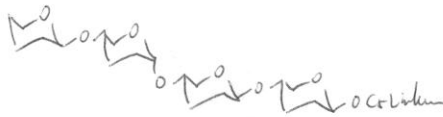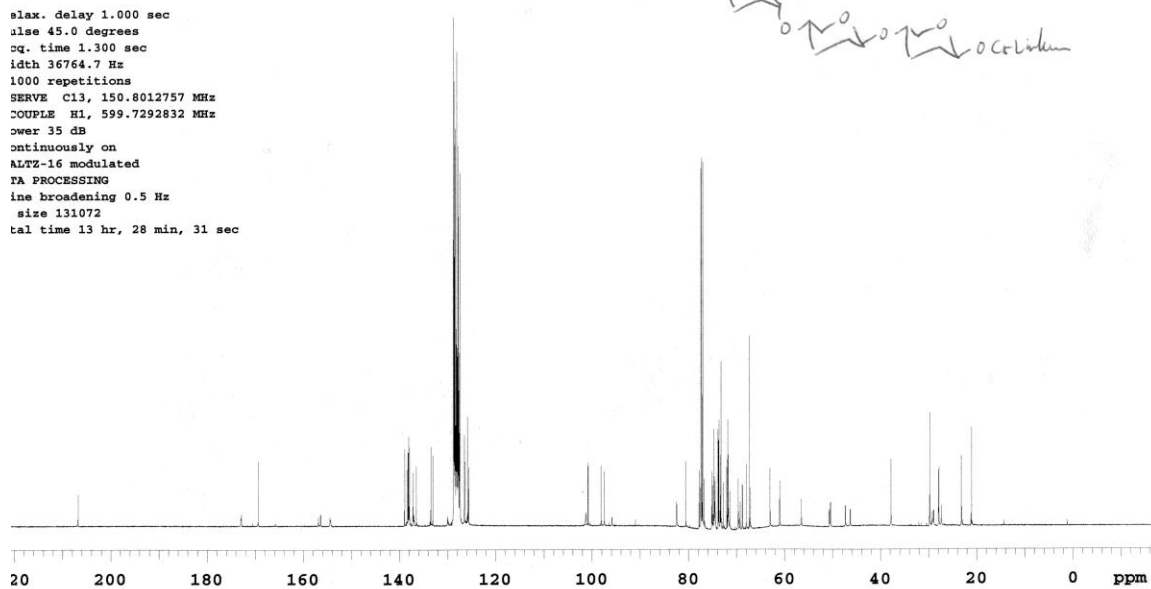

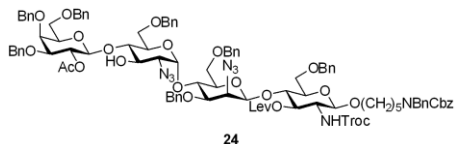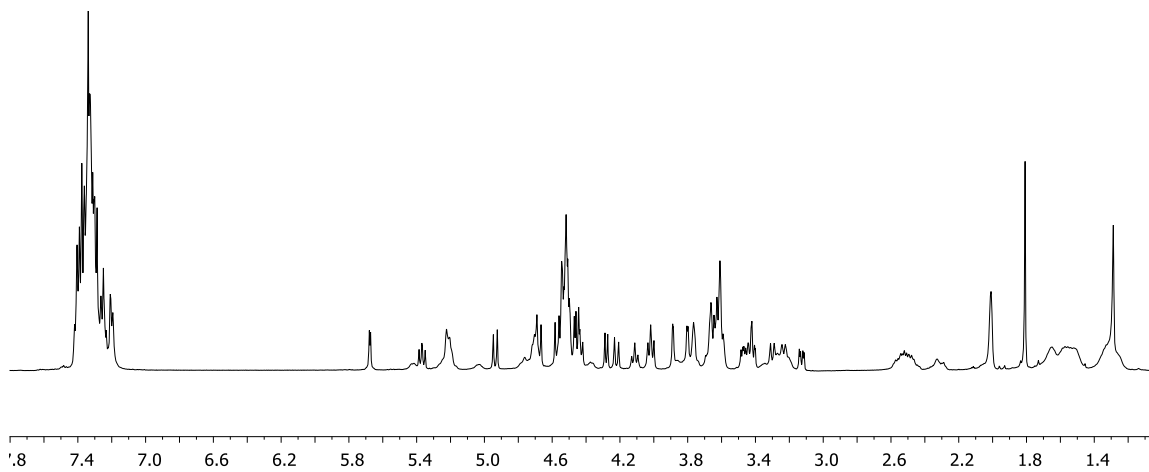

```

.le: Tetra-deFmoc-acceptor_Carbon_20101116_01
.se Sequence: s2pul
.lvent: cdcl3
.mp. 25.0 C / 298.1 K
.rator: kaifor
.e: Tetra-deFmoc-acceptor_Carbon_20101116_01
VA-500 "nmr1"

.lax. delay 1.000 sec
.lse 45.0 degrees
.q. time 1.300 sec
.dth 36764.7 Hz
.000 repetitions
.ERVE C13, 150.8012667 MHz
.OUPLE H1, 599.7292832 MHz
.ver 35 dB
.ntinuously on
.LTZ-16 modulated
.A PROCESSING
.ne broadening 0.5 Hz
.size 131072
.al time 12 hr, 50 min, 1 sec
  
```

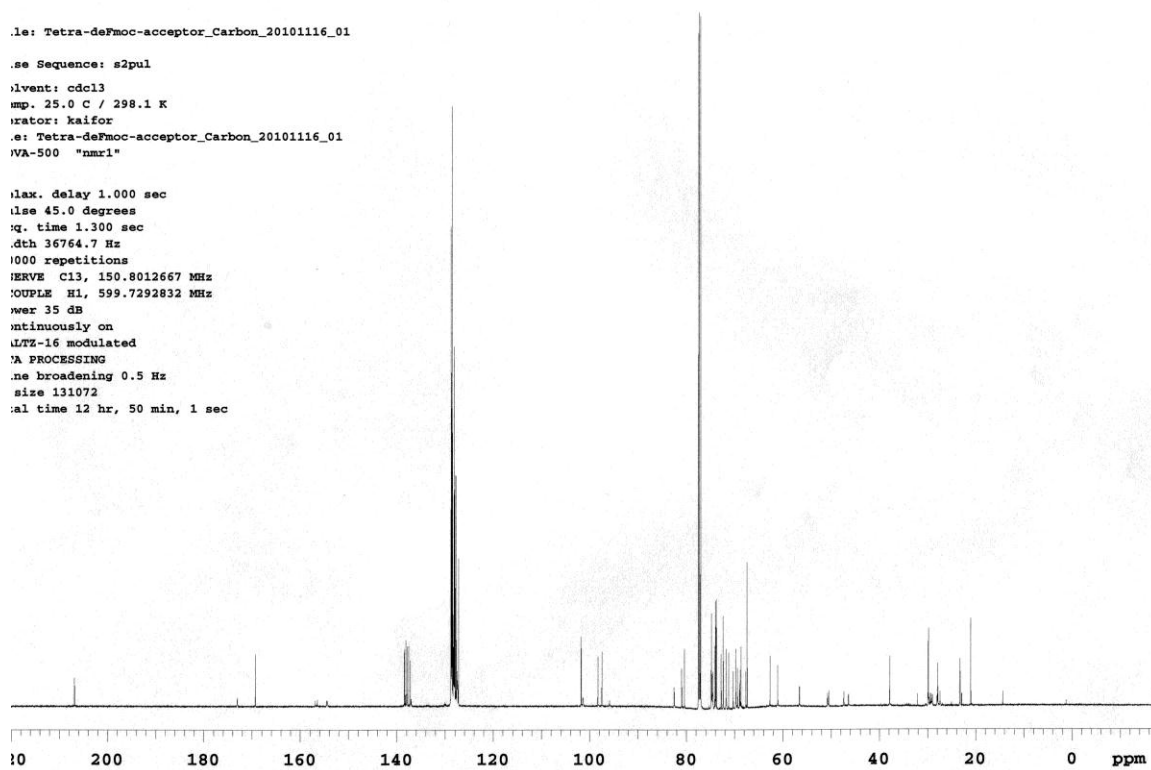

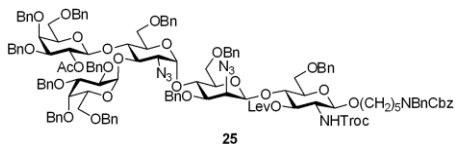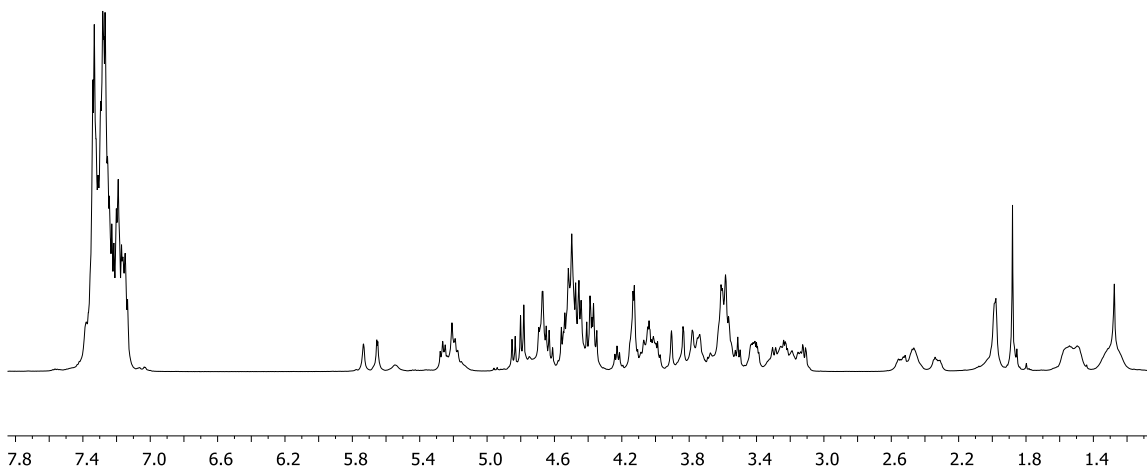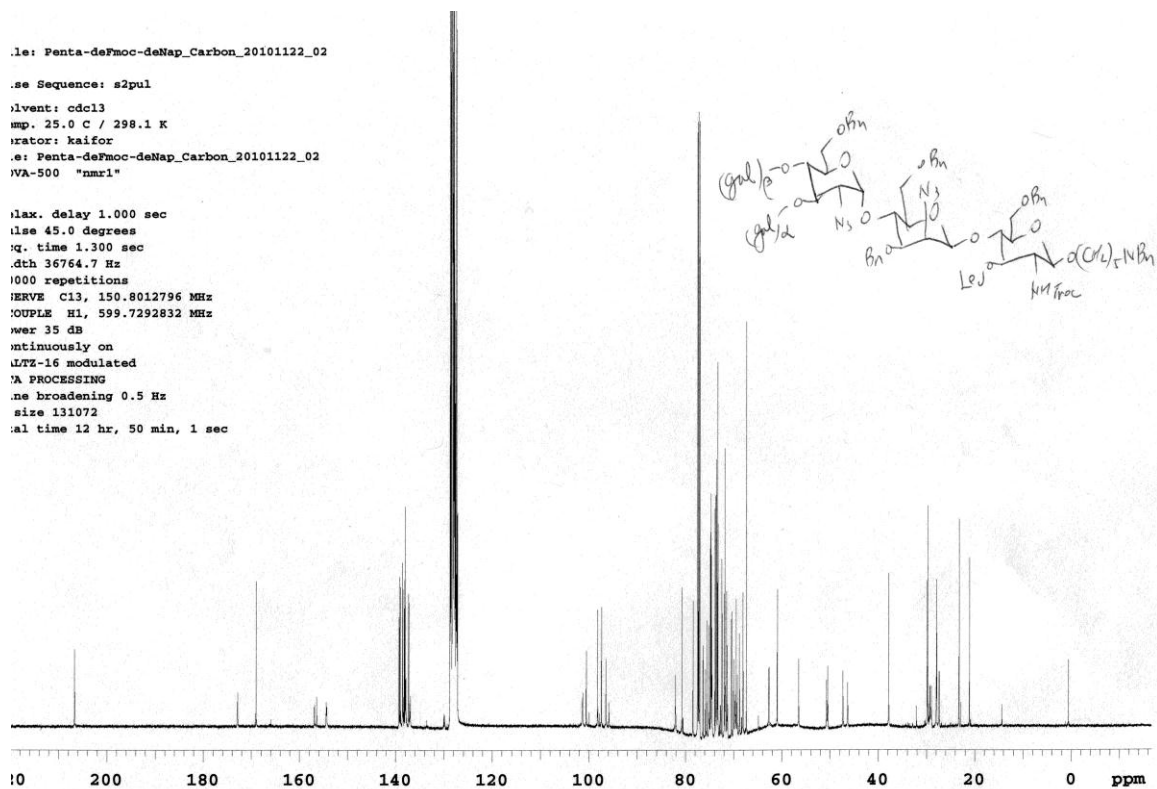

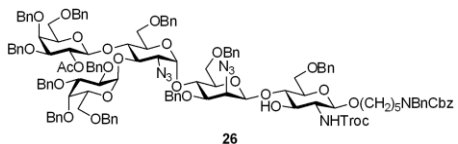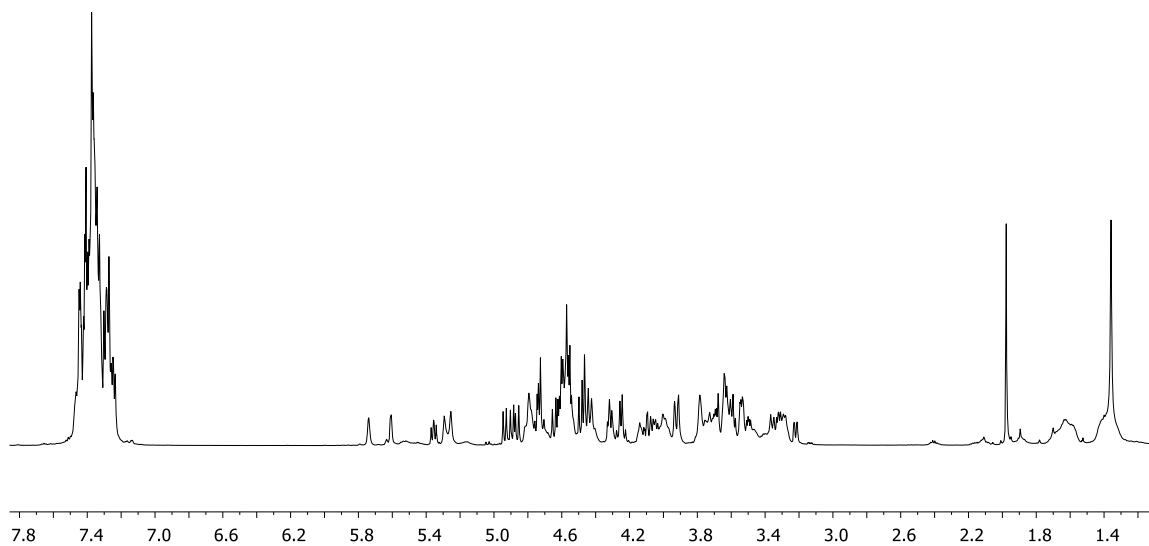

1e: Penta-deFmoc-deNap-acceptor\_Carbon\_20101128\_01  
 se Sequence: s2pul  
 lvent: cdcl3  
 mp. 25.0 C / 298.1 K  
 rator: kaifor  
 e: Penta-deFmoc-deNap-acceptor\_Carbon\_20101128\_01  
 VA-500 "nmr1"

lax. delay 1.000 sec  
 lse 45.0 degrees  
 q. time 1.300 sec  
 dth 36764.7 Hz  
 000 repetitions  
 ERVE C13, 150.8012779 MHz  
 OUPLE H1, 599.7292832 MHz  
 wer 35 dB  
 ntinuously on  
 LTF-16 modulated  
 A PROCESSING  
 ne broadening 0.5 Hz  
 size 131072  
 al time 12 hr, 50 min, 1 sec

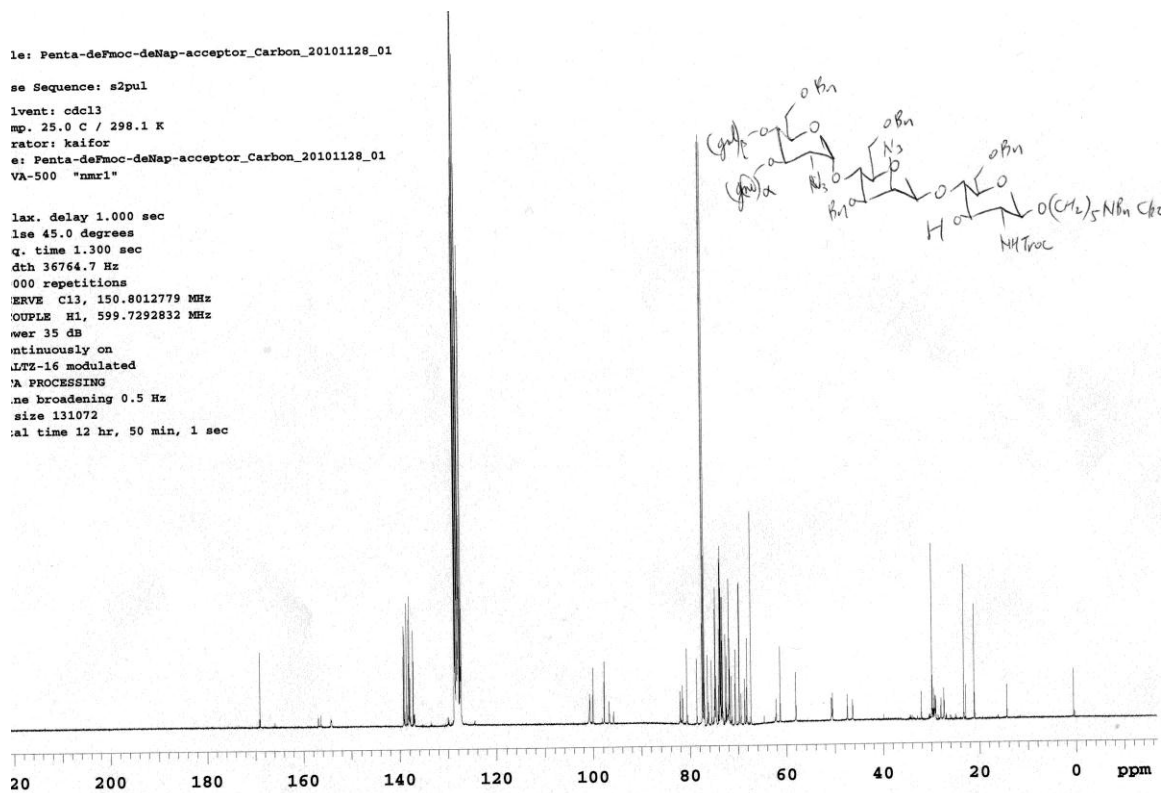

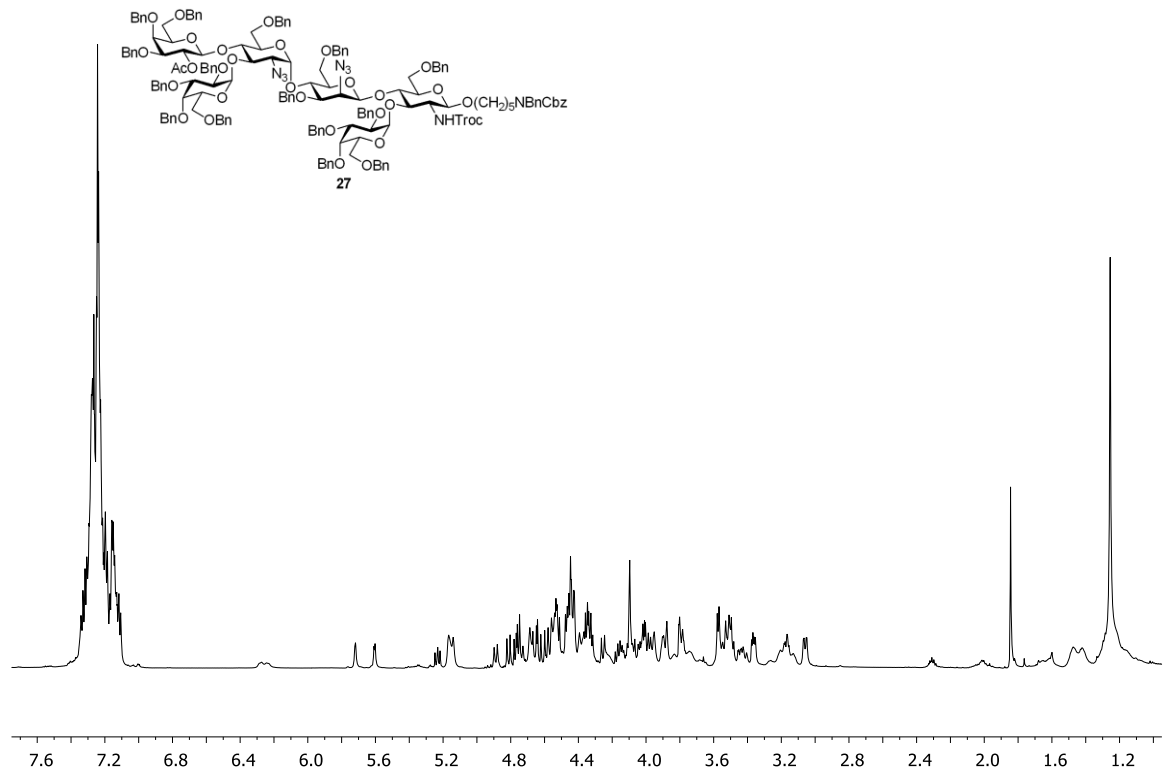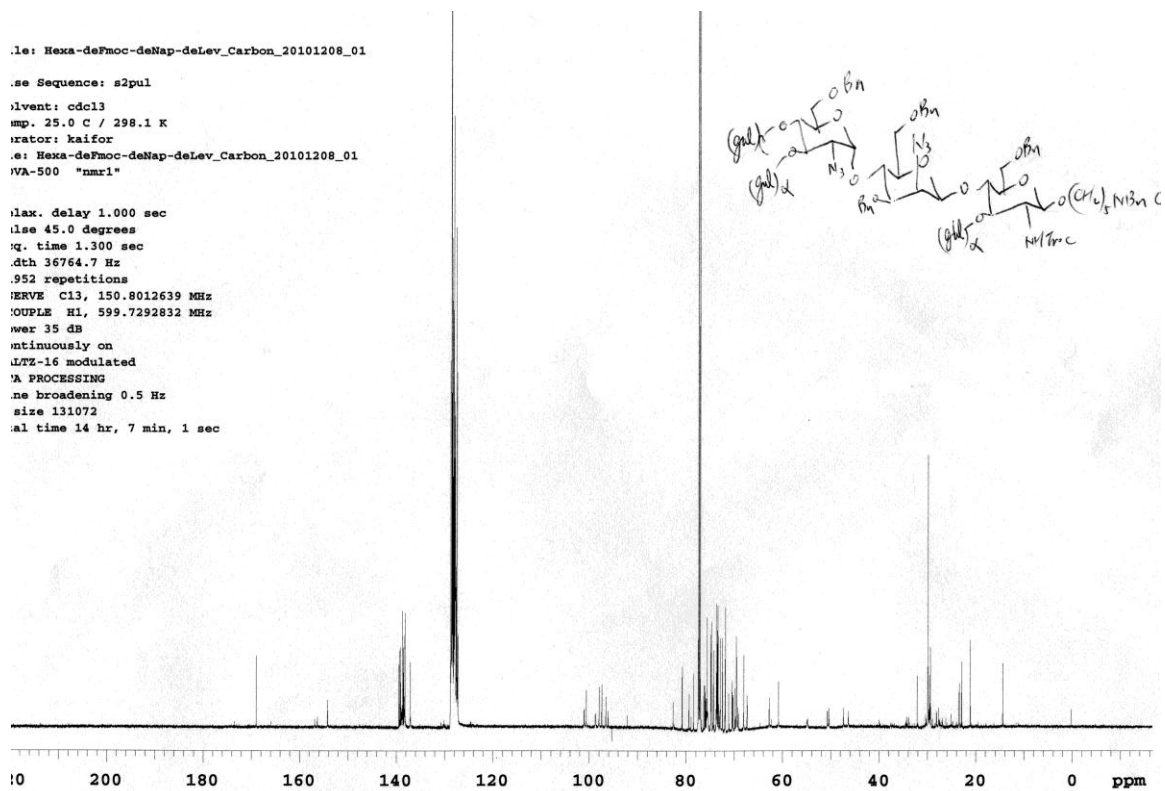

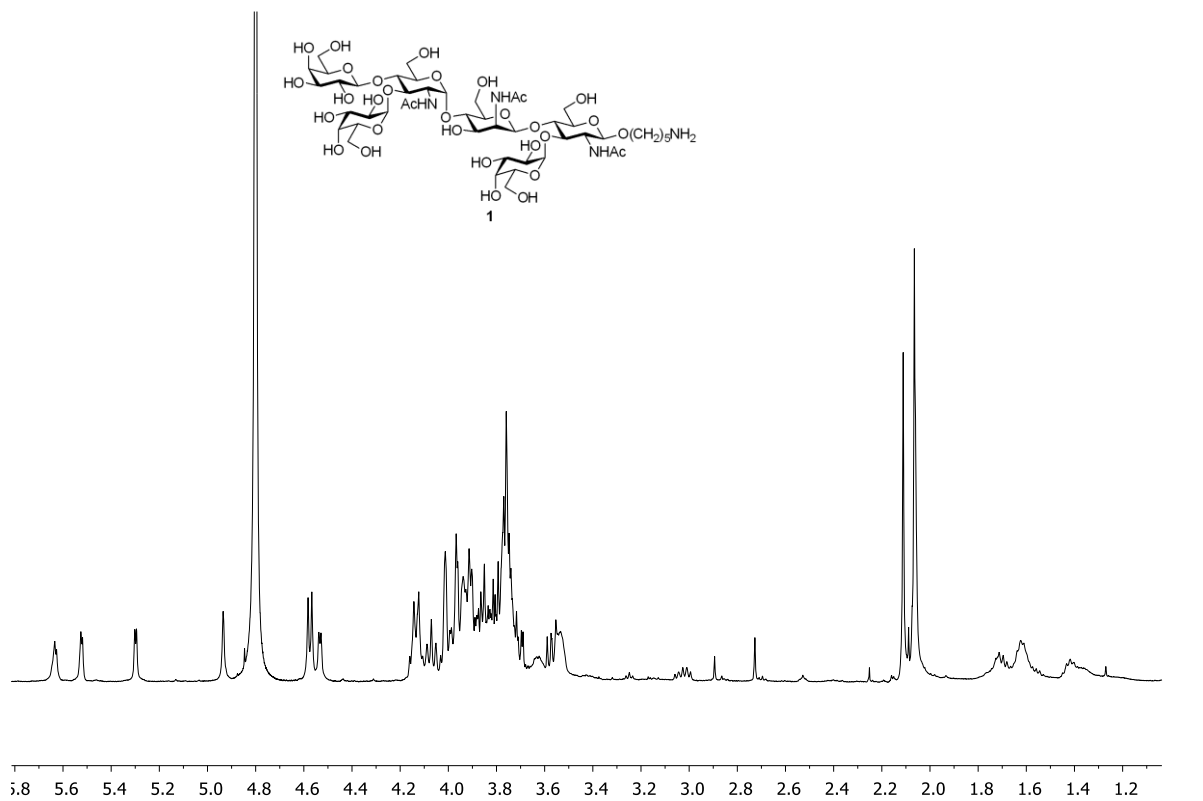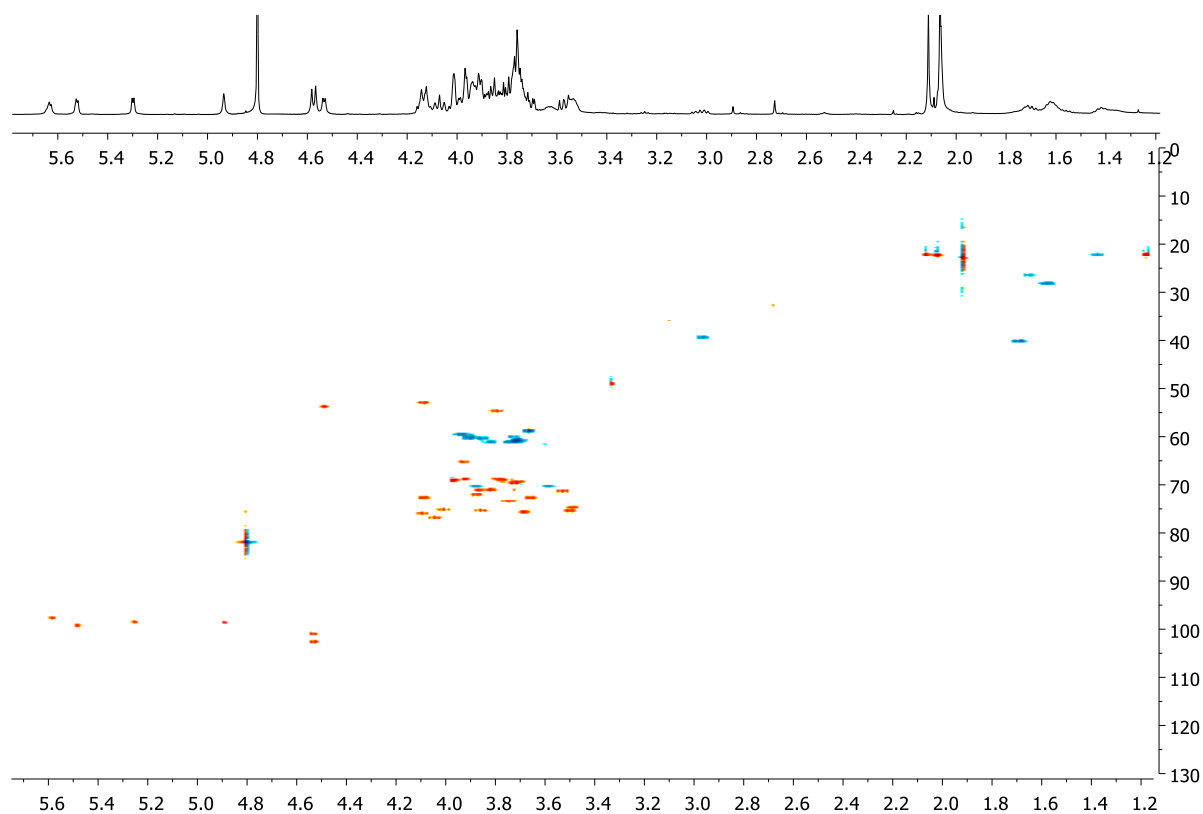

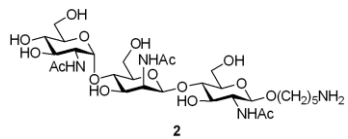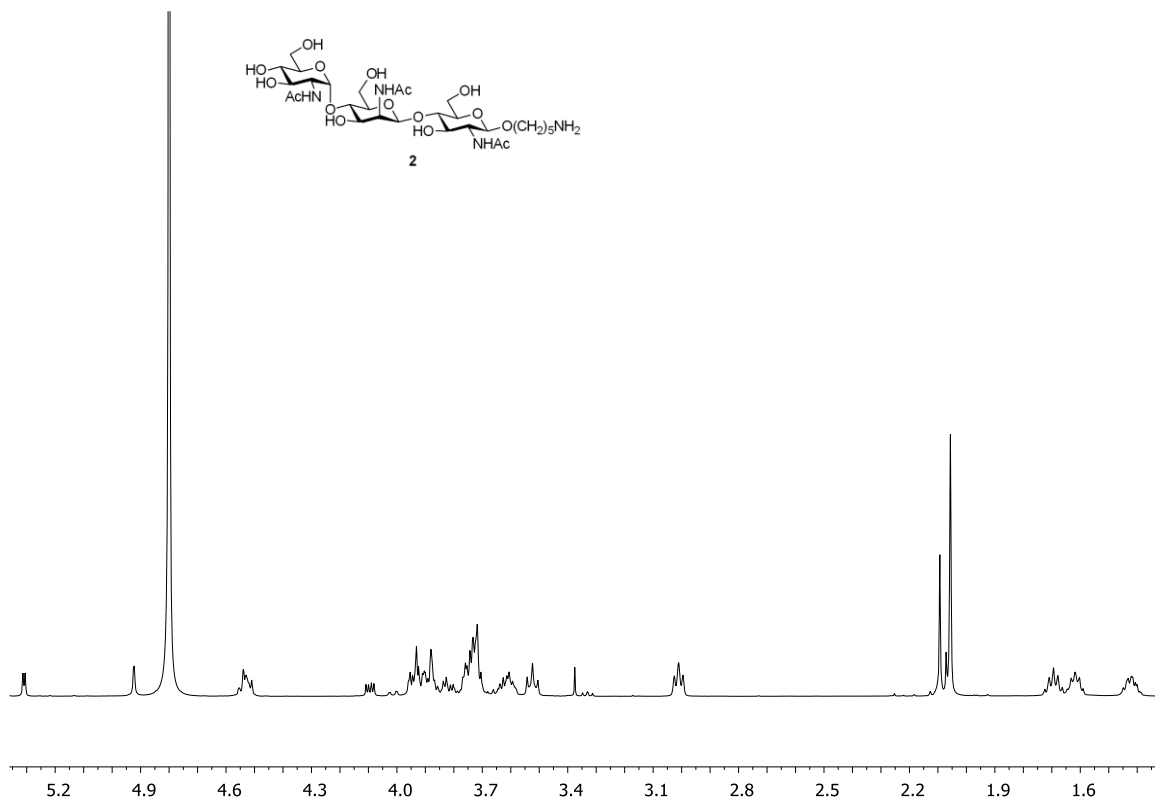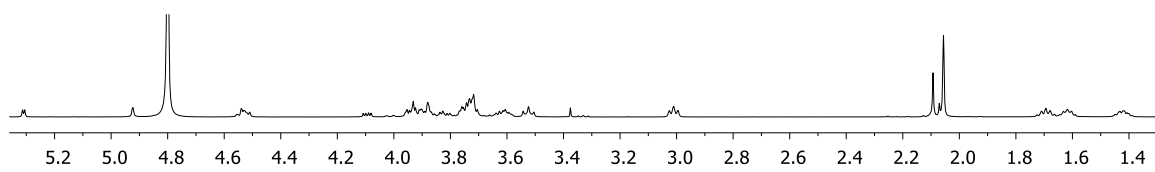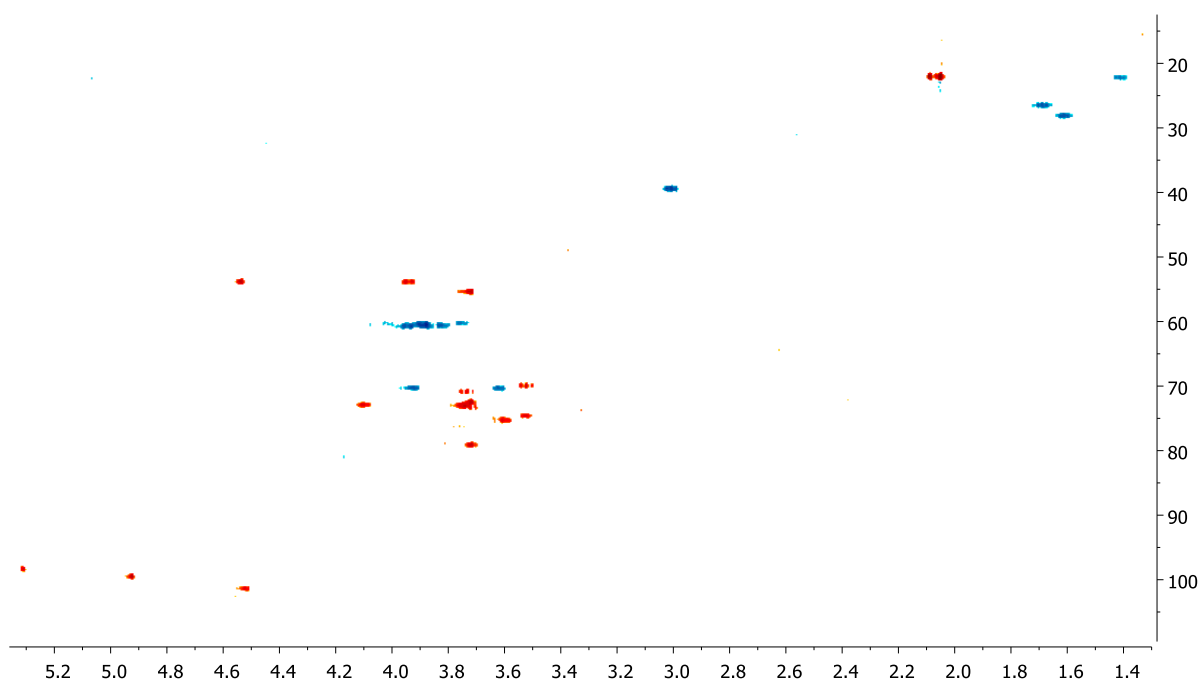



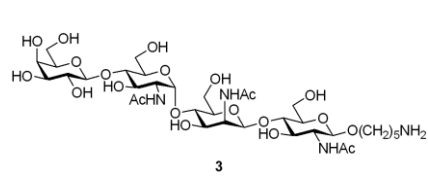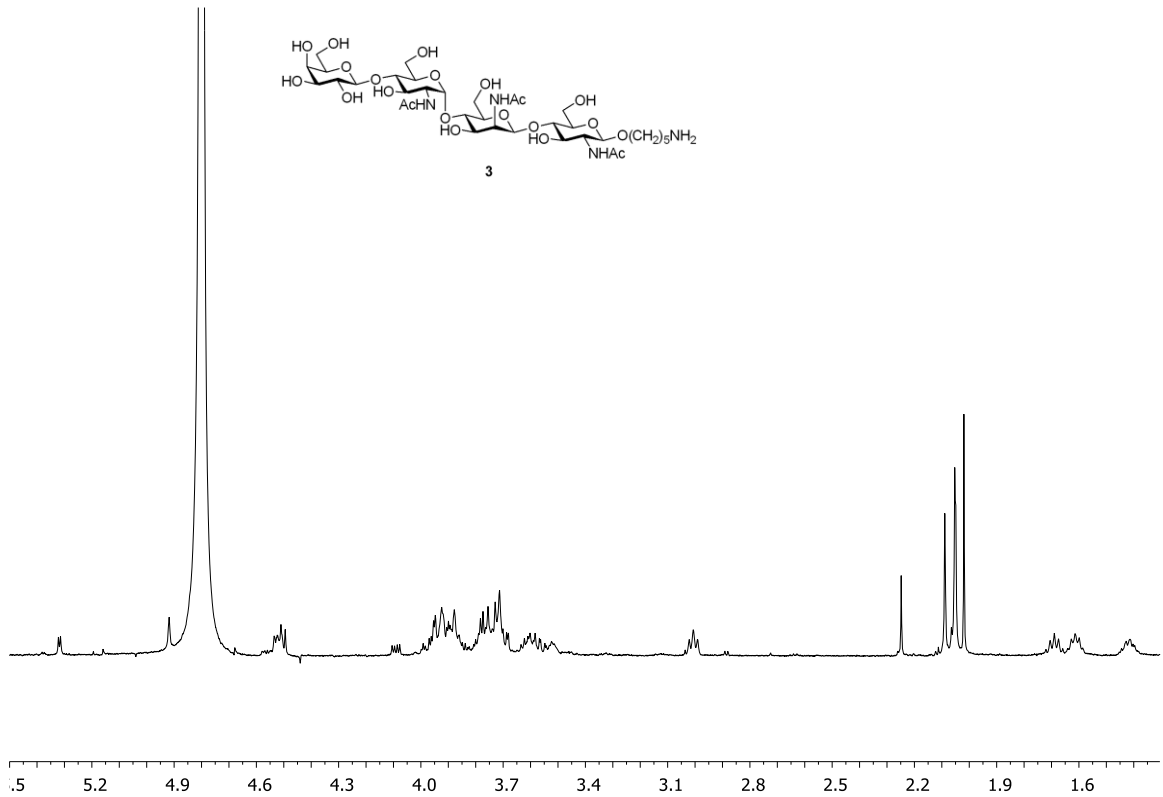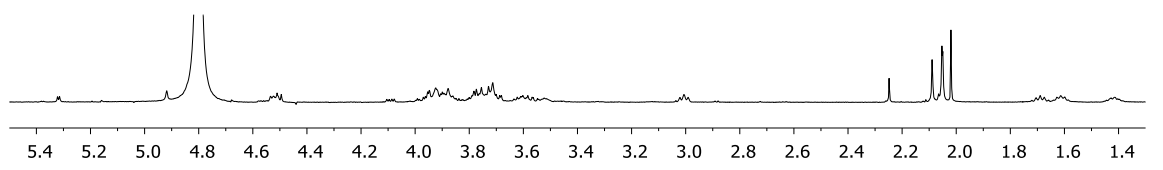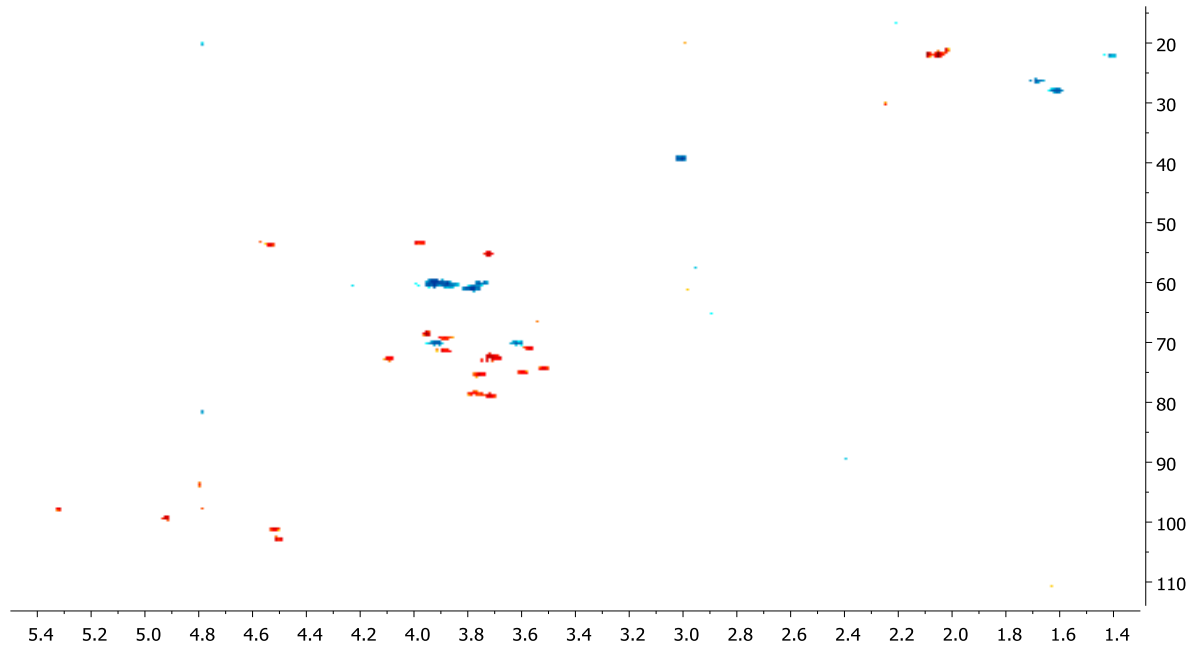

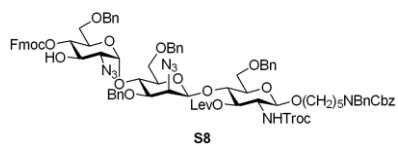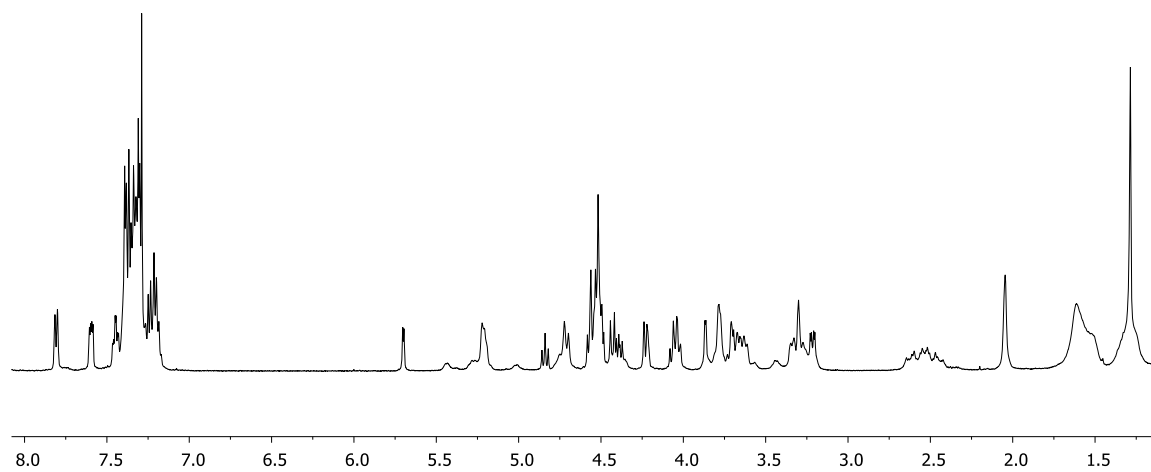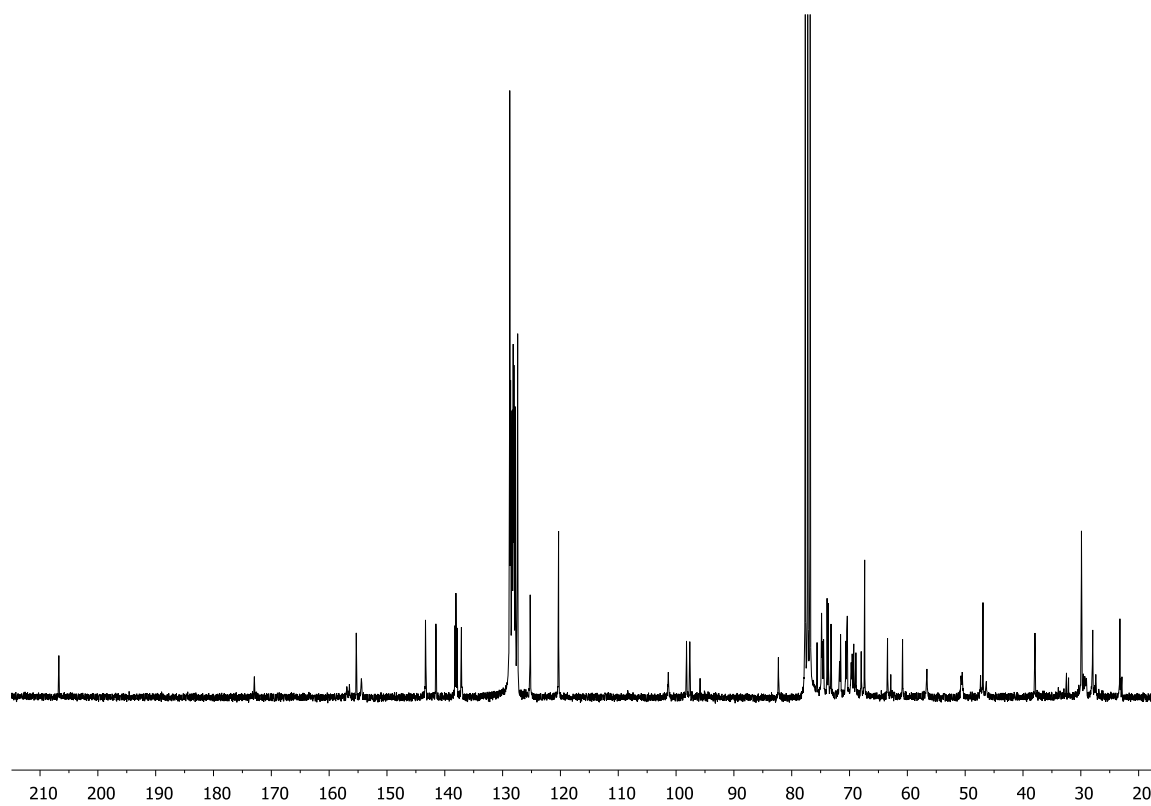

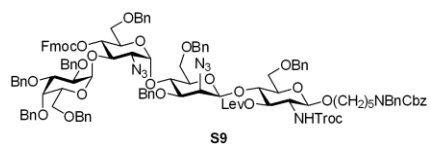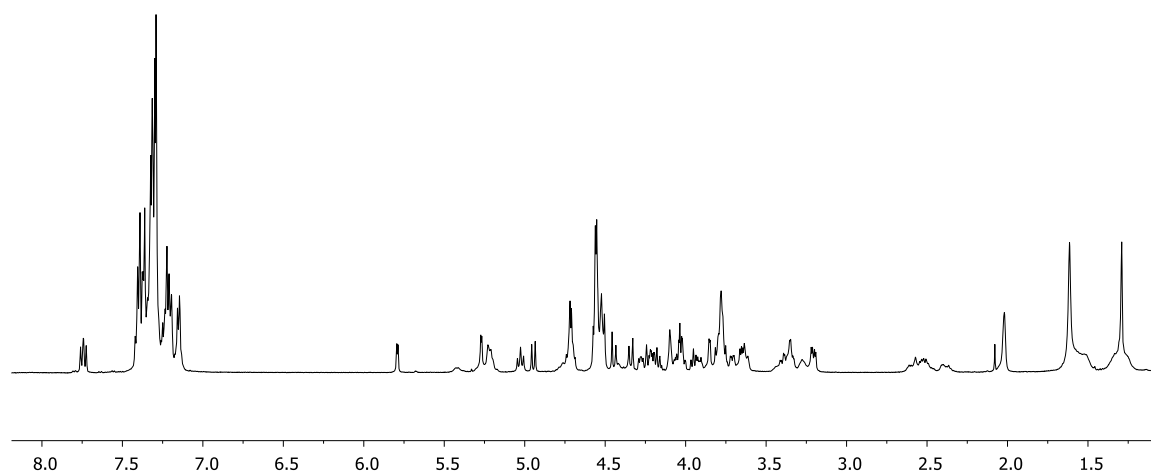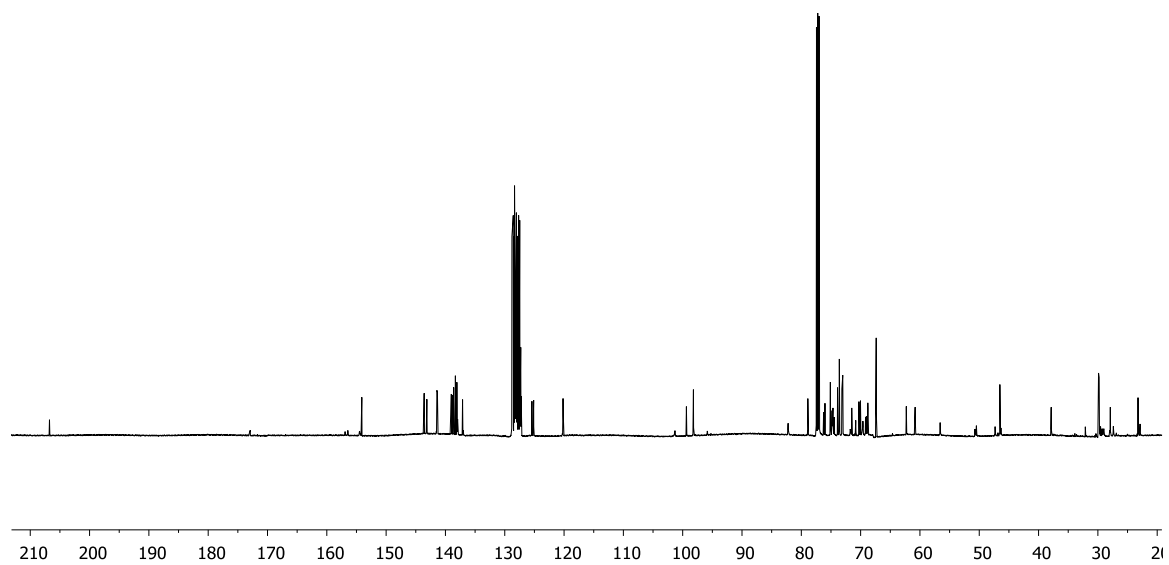

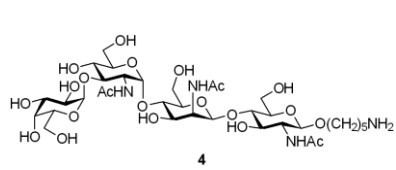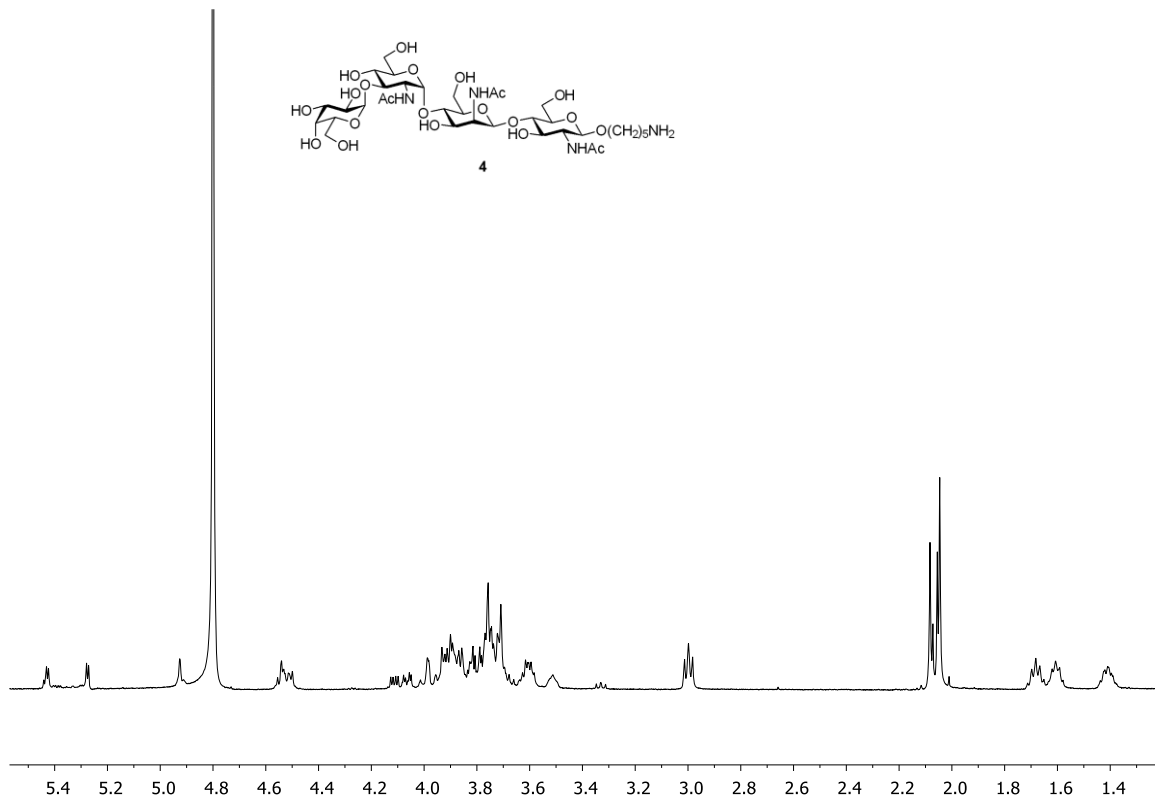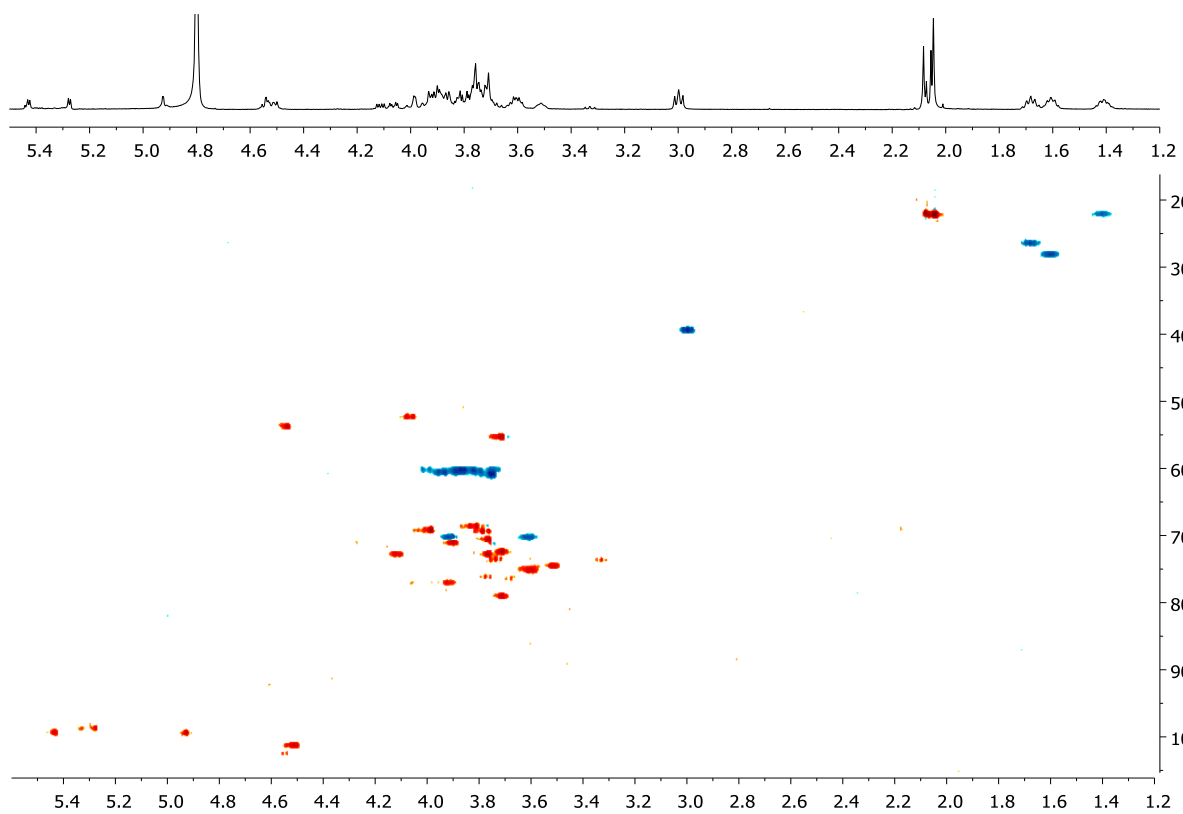

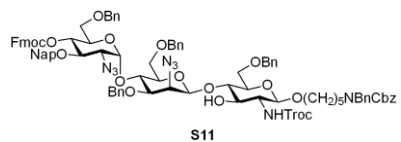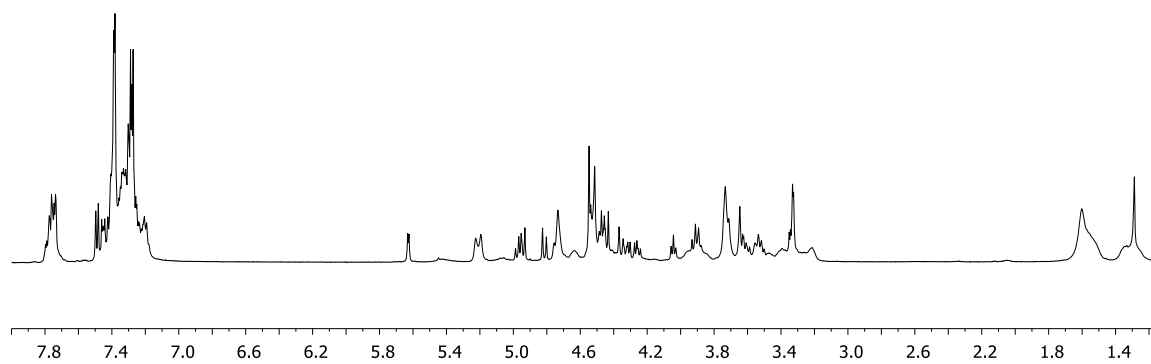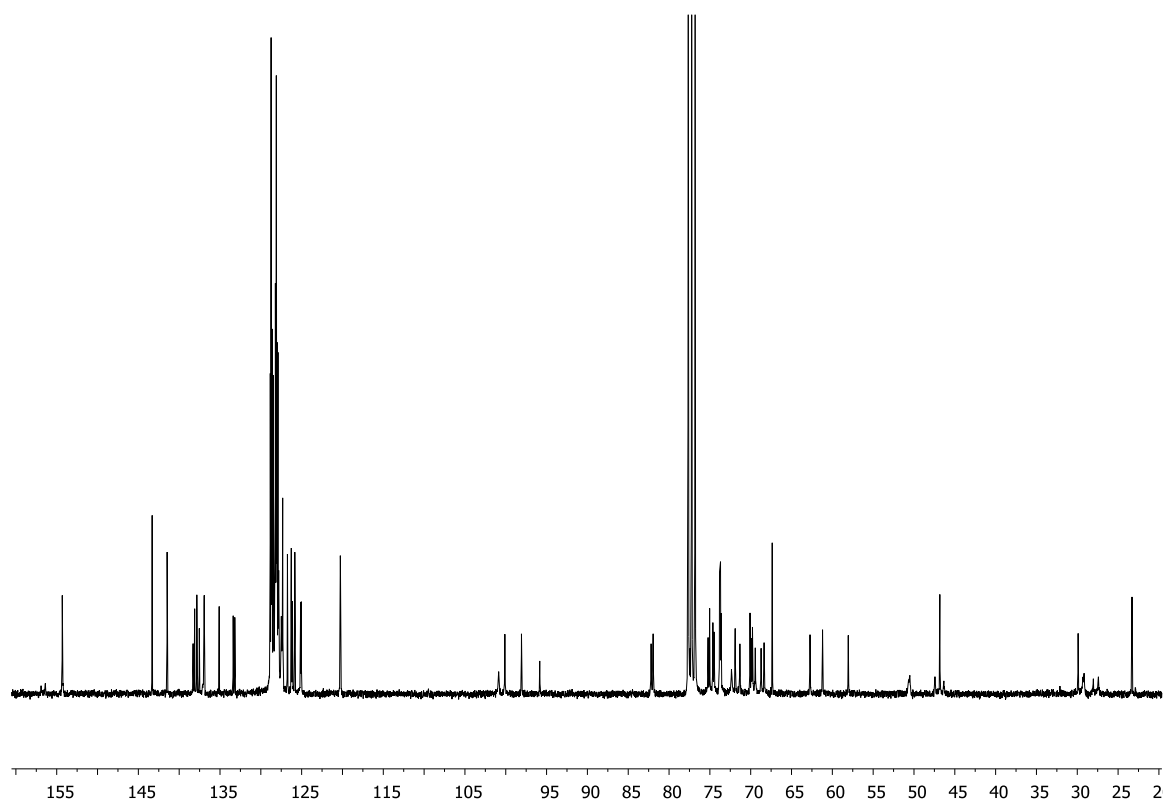

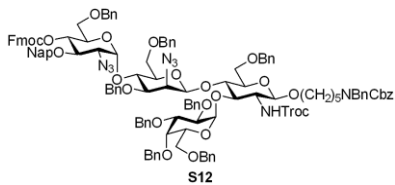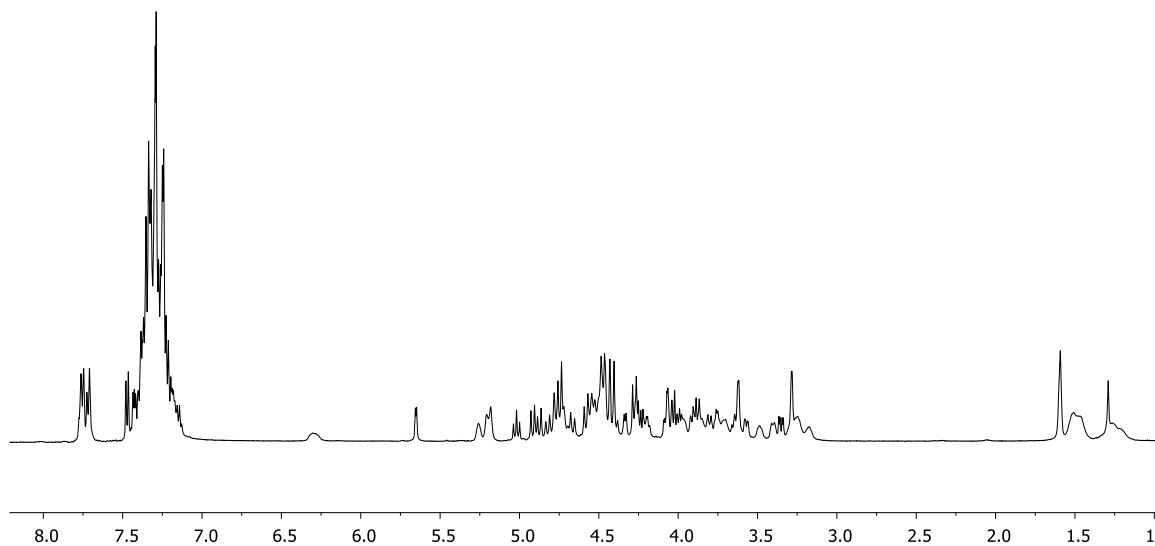

file: Tetra-de-Lev-C-5-Linker\_Carbon\_20100829\_01

lse Sequence: s2pul

olvent: cdcl3

emp. 30.0 C / 303.1 K

erator: kaifor

le: Tetra-de-Lev-C-5-Linker\_Carbon\_20100829\_01

OVA-500 "nmr1"

elax. delay 1.000 sec

ulse 45.0 degrees

cq. time 1.300 sec

idth 36764.7 Hz

832 repetitions

SERVE C13, 150.8012689 MHz

COUPLE H1, 599.7292832 MHz

over 35 dB

continuously on

ALTZ-16 modulated

TA PROCESSING

line broadening 0.5 Hz

size 131072

tal time 15 hr, 24 min, 1 sec

*Handwritten note:*  
  
 gal α.

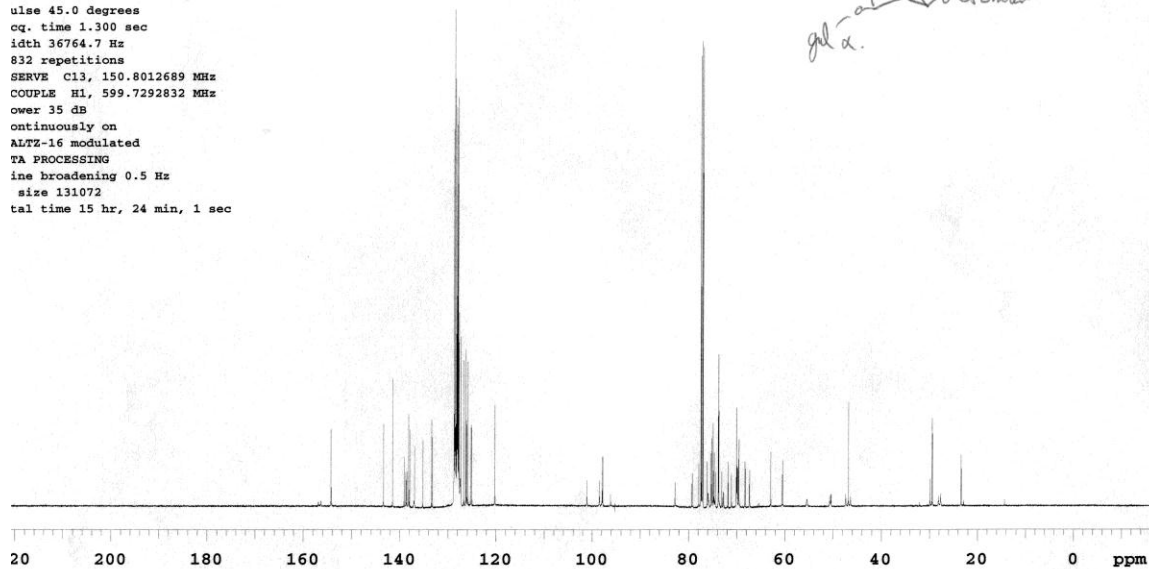

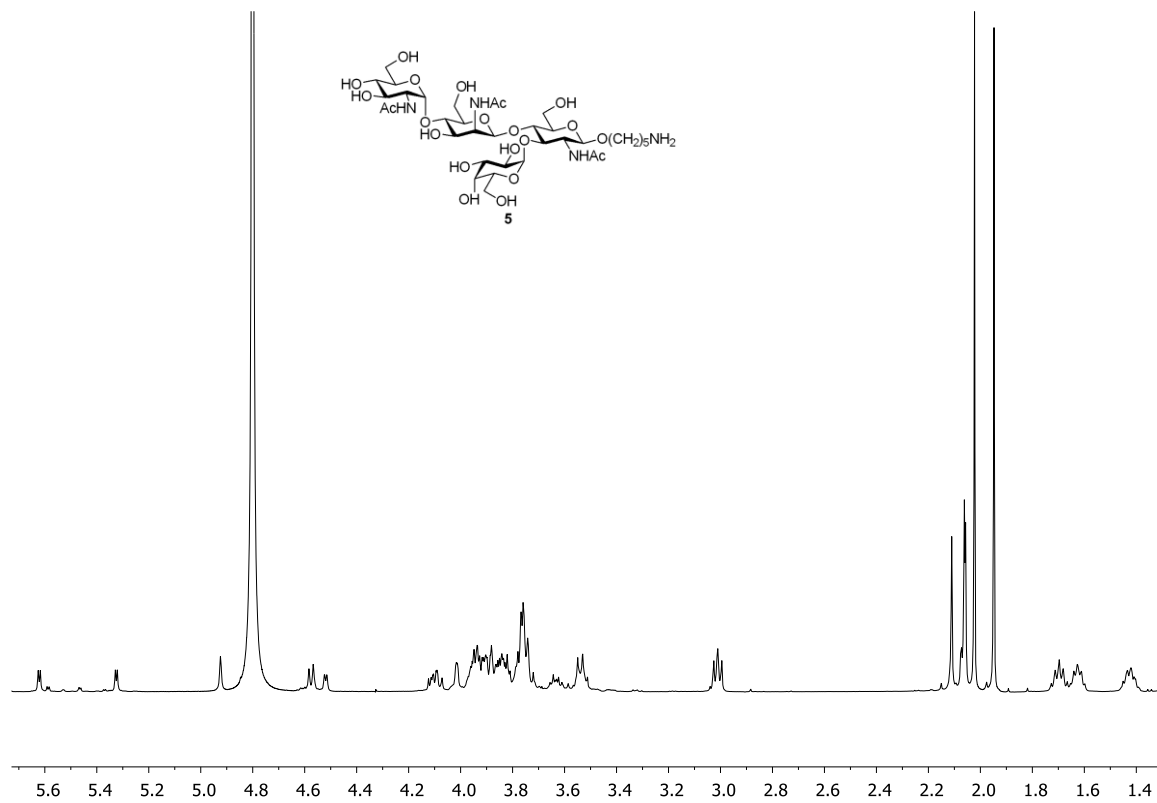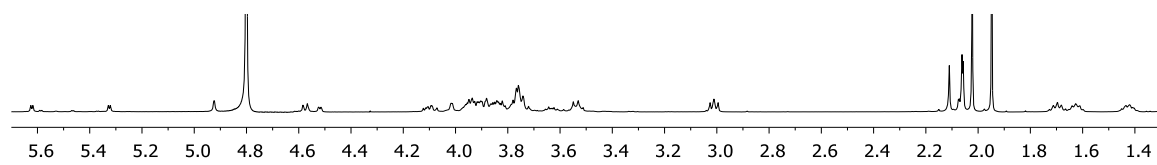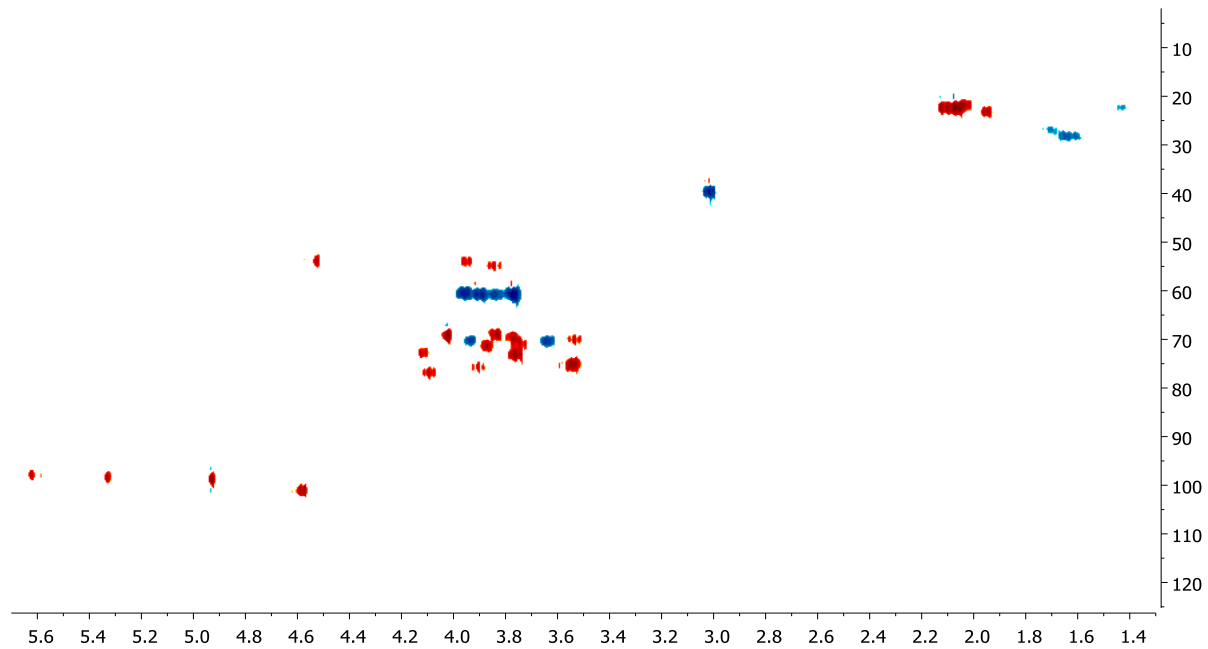

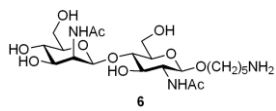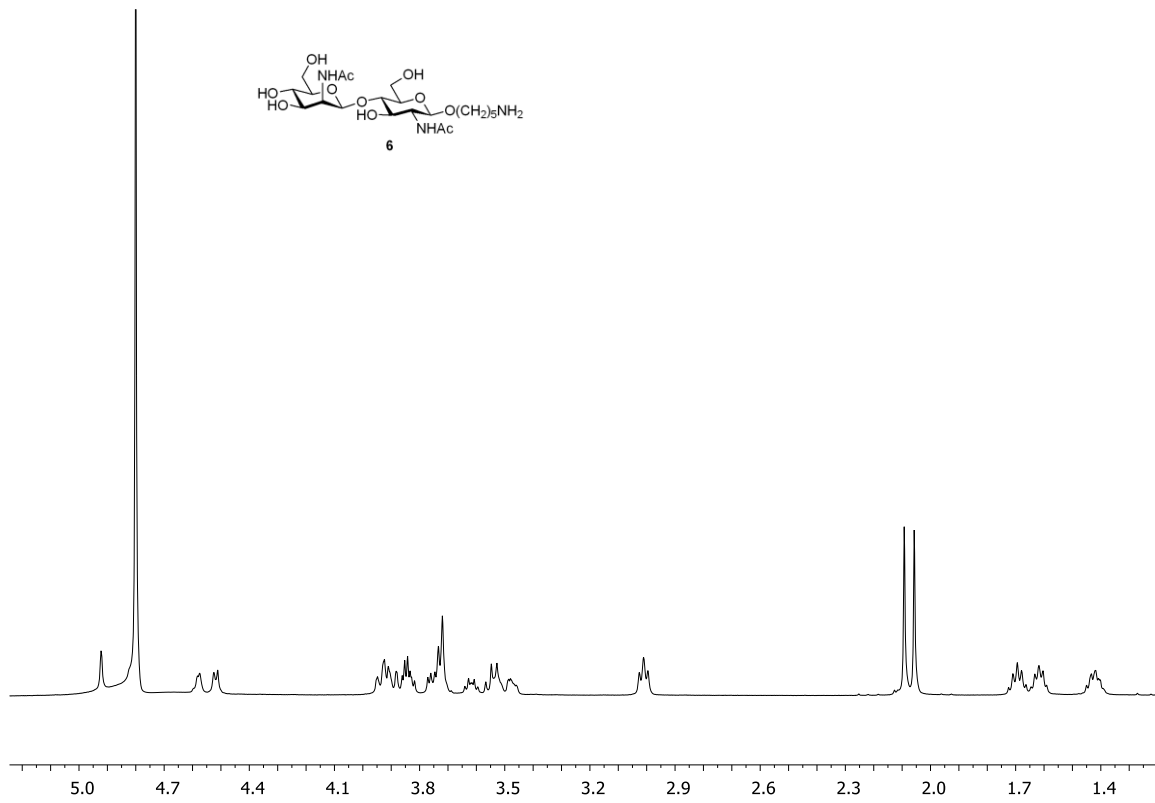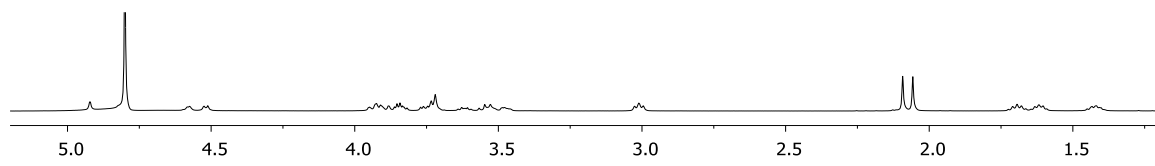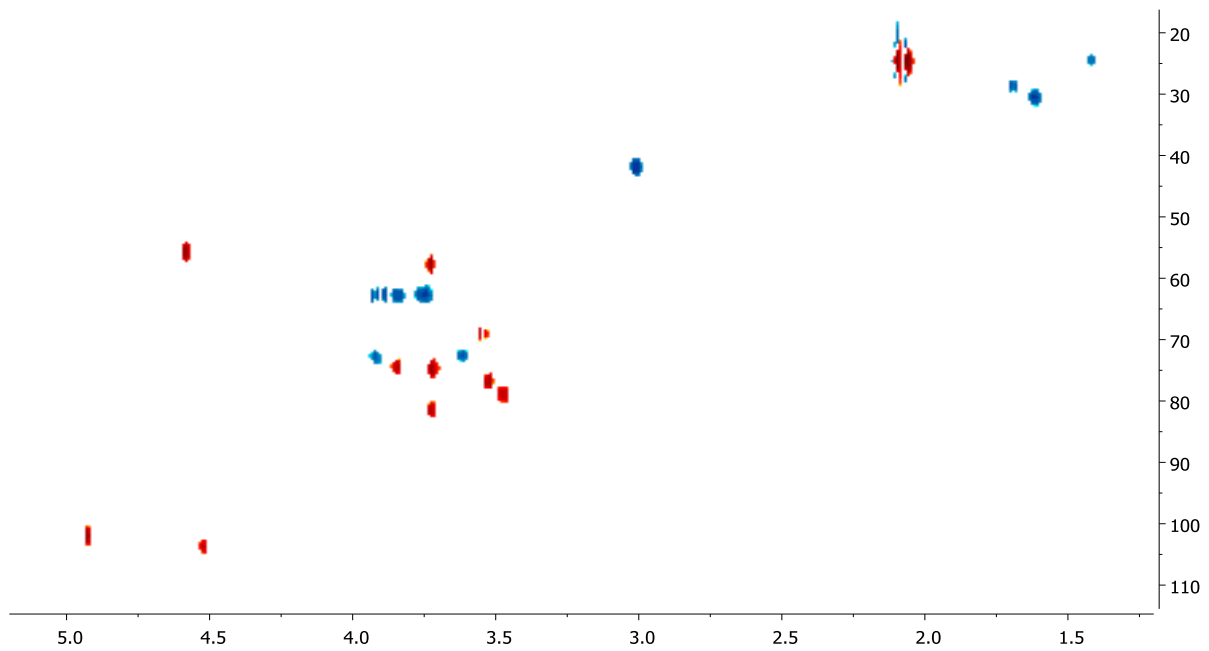



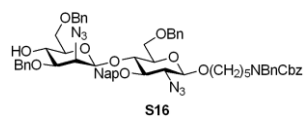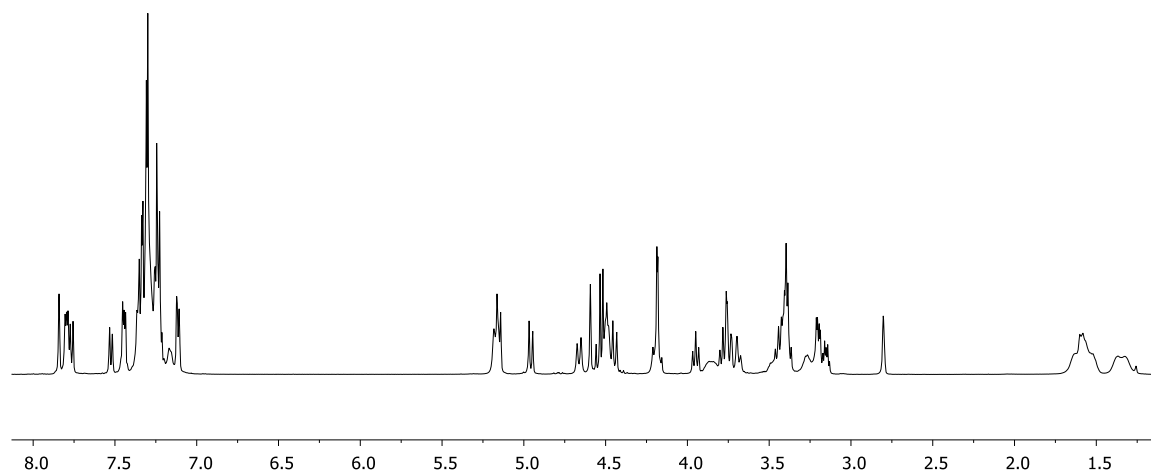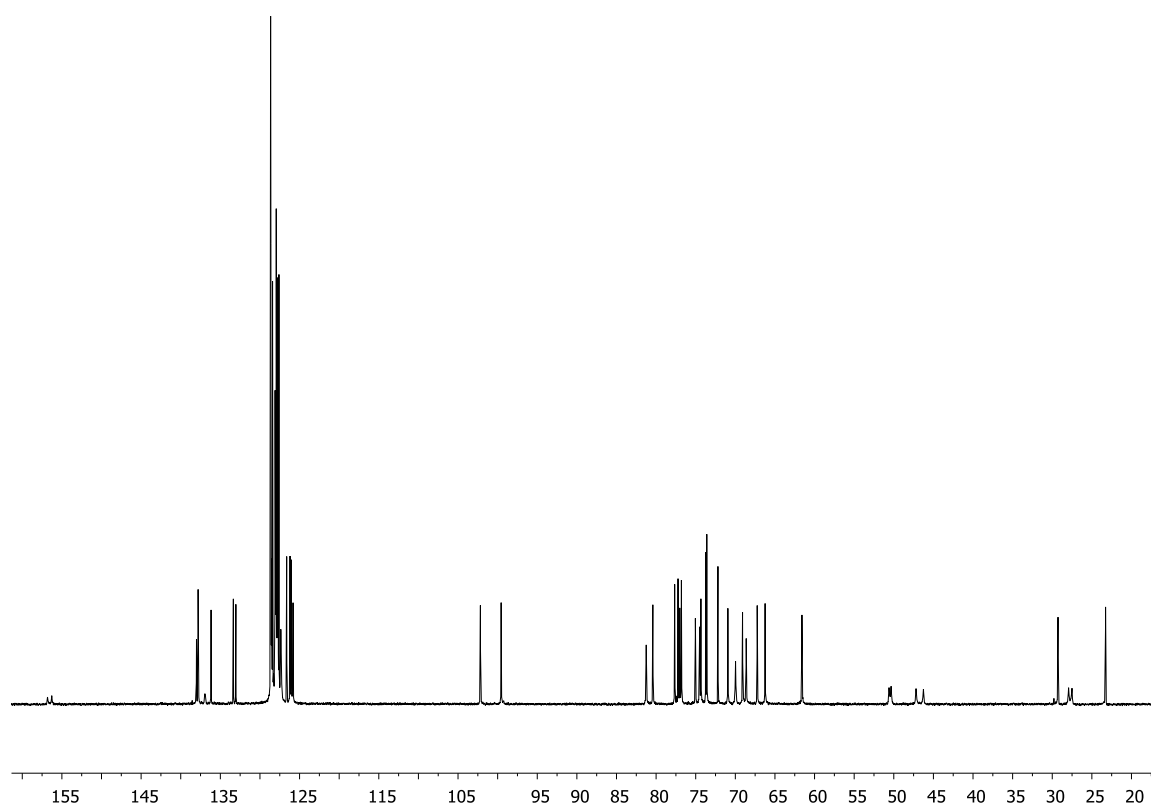





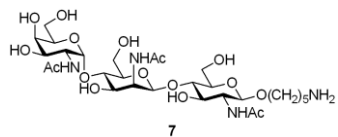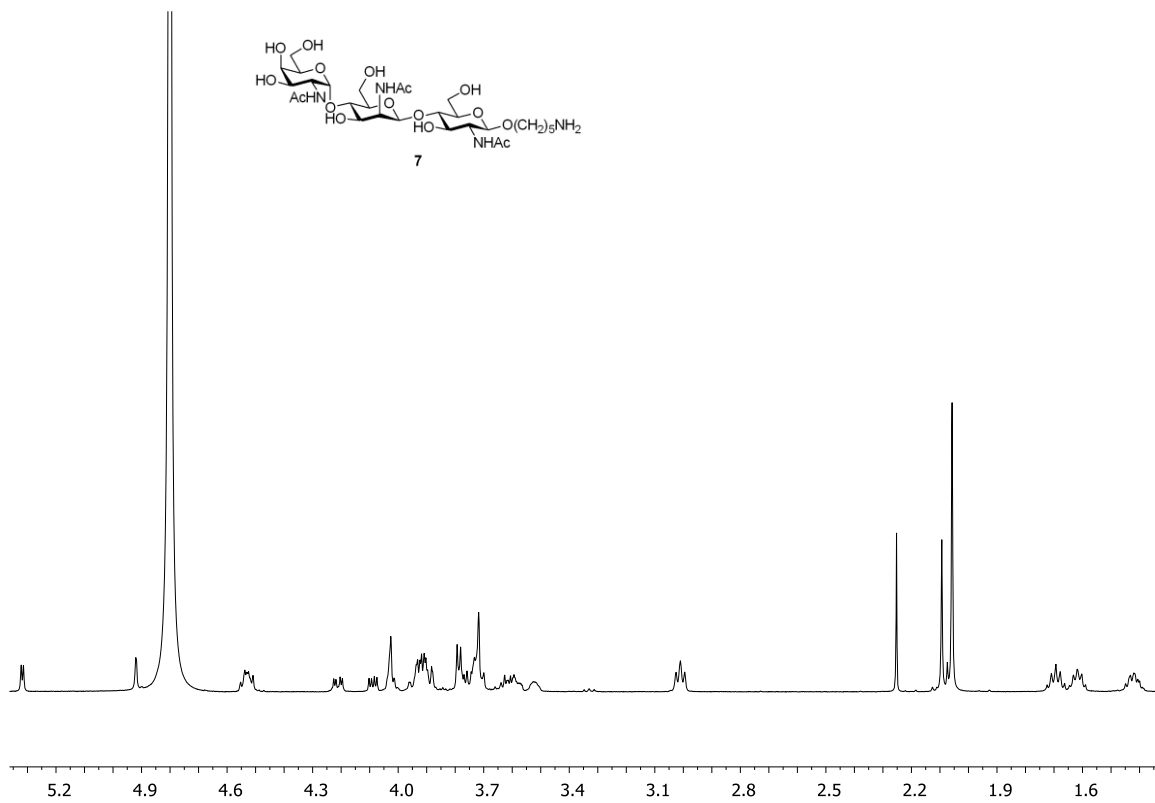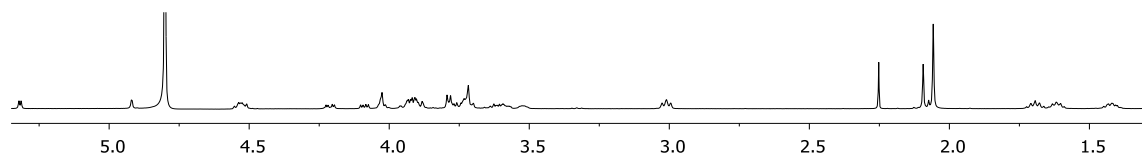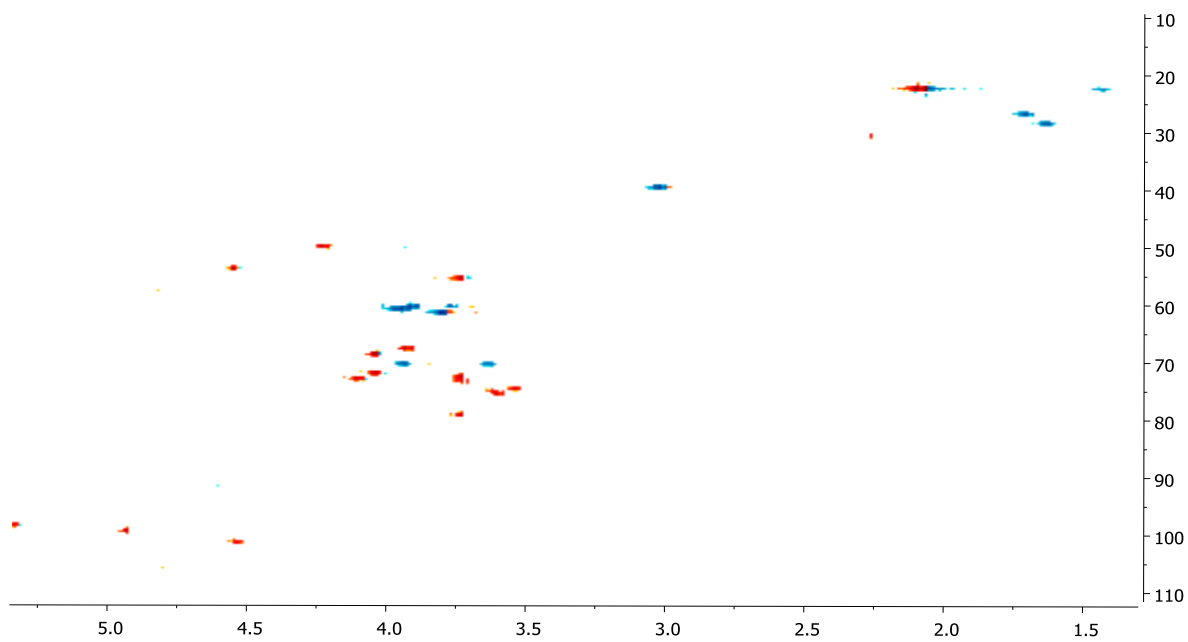

Supplement: NIHMS406087-supplement-1_si_001.pdf [file NIHMS406087-supplement-1_si_001.pdf]
